1 **Phage infection mediates inhibition of bystander bacteria**

2

3 Anushila Chatterjee<sup>a\*</sup>, Julia L. E. Willett<sup>b\*</sup>, Gary M. Dunny<sup>b</sup>, Breck A. Duerkop<sup>a,#</sup>

4

5 <sup>a</sup>Department of Immunology and Microbiology, University of Colorado School of Medicine, Aurora,  
6 CO, USA, 80045. <sup>b</sup>Department of Microbiology and Immunology, University of Minnesota Medical  
7 School, Minneapolis, MN, USA, 55455.

8

9 #Correspondence: Breck A. Duerkop [breck.duerkop@cuanschutz.edu](mailto:breck.duerkop@cuanschutz.edu)

10 \*A.C. and J.L.E.W. contributed equally to this work.

11

12

13 Running title: Phage induced T7SS promotes antibacterial antagonism

14

15 Key words: bacteriophages, *Enterococcus*, antibiotic resistance, phage–bacteria interactions,  
16 bacterial secretion systems, type VII secretion, contact-dependent antagonism

17

18

19

20

21

22

23

24

25

26

27 **Abstract**

28 Bacteriophages (phages) are being considered as potential alternative therapeutics for the  
29 treatment of multidrug resistant bacterial infections. Considering most phages have a narrow host-  
30 range, the generally accepted dogma is that therapeutic phages will have a marginal impact on  
31 bacterial strains outside of their intended target bacterium. We have discovered that lytic phage  
32 infection induces transcription of type VIIIb secretion system (T7SS) genes in the pathobiont  
33 *Enterococcus faecalis*. Phage induction of T7SS genes mediates cell contact dependent  
34 antagonism of diverse Gram positive bystander bacteria. This phage induced T7SS antagonism  
35 is attributed to cell membrane damage. Phage driven T7SS antagonism of neighboring cells is  
36 abrogated by deleting *essB*, a T7SS structural component that is required for secretion of T7SS  
37 toxic substrates. Expression of a predicted immunity gene in bystander bacteria confers protection  
38 against T7SS mediated inhibition, implicating an upstream LXG domain toxin in intraspecies  
39 antagonism. Additionally, phage induction of T7SS gene expression requires IreK, a  
40 Serine/Threonine PASTA kinase. Phage induction of T7SS antimicrobial activity signals through  
41 a non-canonical IreK stress response pathway. Our findings highlight how phage infection of a  
42 target bacterium can unintentionally affect neighboring bystander bacteria. Furthermore, our work  
43 indicates that before phages become a standard of care in the clinic, we must clearly understand  
44 how bacteria respond to phage infection and what, if any, collateral effects phage therapy may  
45 have on non-target bacteria, such as the microbiota.

46

47

48

49

50

51

52

## 53 Introduction

54 Enterococci constitute a minor component of the healthy human microbiota (1). Enterococci,  
55 including *Enterococcus faecalis*, are also nosocomial pathogens that cause a variety of diseases,  
56 including sepsis, endocarditis, surgical-site, urinary tract and mixed bacterial infections (2, 3).  
57 Over recent decades, enterococci have acquired extensive antibiotic resistance traits, including  
58 resistance to “last-resort” antibiotics such as vancomycin, daptomycin, and linezolid (4-8).  
59 Following antibiotic therapy, multi-drug resistant (MDR) enterococci can outgrow to become a  
60 dominant member of the intestinal microbiota, resulting in intestinal barrier invasion and blood  
61 stream infection (7, 9). The ongoing evolution of MDR enterococci in healthcare settings (4-6, 10,  
62 11) and their ability to transmit antibiotic resistance among diverse bacteria (9, 12-15), emphasize  
63 the immediate need for novel therapeutic approaches to control enterococcal infections.

64 Viruses that infect and kill bacteria (bacteriophages or phages) are receiving attention for their  
65 use as antibacterial agents (16). Recent studies have demonstrated the efficacy of anti-  
66 enterococcal phages in murine models of bacteremia (17-19) and the administration of phages to  
67 reduce *E. faecalis* burden in the intestine gives rise to phage resistant isolates that are  
68 resensitized to antibiotics (20). Considering phages are highly specific for their target bacterium,  
69 coupled with the self-limiting nature of their host-dependent replication, suggests that unlike  
70 antibiotics which have broad off-target antimicrobial activity, phages are likely to have nominal  
71 impact on bacteria outside of their intended target strain (21-23). However, our understanding of  
72 how phages interact with bacteria and the bacterial response to phage infection is limited.

73 While studying the transcriptional response of phage infected *E. faecalis* cells, we discovered  
74 that phage infection induced the expression of genes involved in the biosynthesis of a type VIIb  
75 secretion system (T7SS) (24). Firmicutes, including the enterococci, harbor diverse T7SS genes  
76 encoding transmembrane and cytoplasmic proteins involved in the secretion of protein substrates  
77 (25), and T7SSs promote antagonism of non-kin bacterial cells through contact-dependent  
78 secretion of antibacterial effectors and/or toxins (26, 27). The antibacterial activity of T7SSs from

79 *Staphylococcus* and *Streptococcus* are well characterized (25) but T7SS-mediated antibacterial  
80 antagonism has not been described in *Enterococcus*. The environmental cues and regulatory  
81 pathways that govern T7SS expression and activity are poorly understood, although recent  
82 studies indicate that exposure to serum and membrane stresses triggered by pulmonary  
83 surfactants, fatty acids and phage infection stimulate T7SS gene expression (24, 28-31). This  
84 motivated us to determine if phage induced T7SS gene expression in *E. faecalis* results in the  
85 inhibition of non-kin bacterial cells that are not phage targets (bystanders). We discovered that  
86 phage infected *E. faecalis* produces potent T7SS antibacterial activity against bystander bacteria.  
87 Expression of a T7SS antitoxin (immunity factor) gene in bystander cells confers protection  
88 against phage mediated T7SS inhibition. Additionally, we discovered that membrane stress during  
89 phage infection induces transcription of T7SS genes via a non-canonical IreK signaling pathway.  
90 To our knowledge, the enterococcal T7SS is the only example of secretion system induction  
91 during phage infection. These data shed light on how phage infection of a cognate bacterial host  
92 can influence polymicrobial interactions and raises the possibility that phages may impose  
93 unintended compositional shifts among bystander bacteria in the microbiota during phage  
94 therapy.

95

## 96 **Results**

### 97 **Phage mediated induction of *E. faecalis* T7SS leads to interspecies antagonism.**

98 A hallmark feature of phage therapy is that because phages often have a narrow host range,  
99 they will not influence the growth of non-susceptible bacteria occupying the same niche (22). We  
100 discovered that infection of *E. faecalis* OG1RF by phage VPE25, induces the expression of T7SS  
101 genes (24). The *E. faecalis* OG1RF T7SS locus is absent in the commonly studied vancomycin-  
102 resistant strain V583, despite conservation of flanking genes (Fig. 1A) (32, 33). Homologs of the  
103 *E. faecalis* T7SS gene *exsA* are found throughout three of the four *Enterococcus* species groups  
104 (34), including *Enterococcus faecium*, suggesting a wide distribution of T7SS loci in enterococci

105 (Fig. S1). *In silico* analyses predict that the *E. faecalis* T7SS locus encodes multiple WXG100  
106 family effectors and LXG family polymorphic toxins (27, 35). Hence, we hypothesized that  
107 induction of T7SS genes during phage infection and consequently the heightened production of  
108 T7SS substrates would indirectly influence the growth of non-kin phage-resistant bacterial cells.

109 To investigate if T7SS factors produced during phage infection of *E. faecalis* OG1RF interferes  
110 with the growth of phage-resistant bystander bacteria, we generated a strain with an in-frame  
111 deletion in the T7SS gene *essB*, encoding a transmembrane protein involved in the transport of  
112 T7SS substrates (36). The *essB* mutant is equally susceptible to phage VPE25 infection  
113 compared to wild type *E. faecalis* OG1RF (Fig. S2). We performed co-culture experiments where  
114 phage susceptible wild type *E. faecalis* OG1RF or  $\Delta$ *essB* were mixed with a phage resistant  
115 bystander, a strain of *E. faecalis* V583 deficient in the production the VPE25 receptor ( $\Delta$ *pip*<sub>V583</sub>)  
116 (37), at a ratio of 1:1 in the absence and presence of phage VPE25 (multiplicity of infection [MOI]  
117 = 0.01) (Fig. 1B). Since the *E. faecalis* V583 genome does not contain T7SS genes, this strain  
118 should lack immunity to T7SS antagonism (33). The viability of *E. faecalis*  $\Delta$ *pip*<sub>V583</sub>, was reduced  
119 nearly 100-fold when co-cultured with *E. faecalis* OG1RF in the presence of phage VPE25 (Fig.  
120 1C). However, growth inhibition of *E. faecalis*  $\Delta$ *pip*<sub>V583</sub> was abrogated during co-culture with phage  
121 infected *E. faecalis*  $\Delta$ *essB*. Phage induced T7SS antagonism could be restored by  
122 complementation (Fig. 1C), indicating that inhibition of phage resistant *E. faecalis*  $\Delta$ *pip*<sub>V583</sub> is T7SS  
123 dependent.

124 T7SS encoded antibacterial toxins secreted by Gram positive bacteria influence intra- and  
125 interspecies antagonism (26, 27). While a nuclease toxin produced by *Staphylococcus aureus*  
126 targets a closely related *S. aureus* strain (26), *Streptococcus intermedius* exhibits T7SS  
127 dependent antagonism against a wide-array of Gram positive bacteria (27). To determine the  
128 target range of *E. faecalis* OG1RF T7SS antibacterial activity, we measured the viability of a panel  
129 of VPE25 resistant Gram positive and Gram negative bacteria in our co-culture assay (Fig. 1B).  
130 Growth inhibition of the distantly related bacterial species *E. faecium* and Gram positive bacteria

131 of diverse genera, including *S. aureus* and *Listeria monocytogenes*, occurred following co-culture  
132 with phage infected wild type *E. faecalis* OG1RF but not the  $\Delta$ essB mutant (Fig. 1D). In contrast,  
133 Gram positive streptococci were unaffected (Fig. 1D). Similarly, phage induced T7SS activity did  
134 not inhibit any Gram negative bacteria tested (Fig. 1D). Collectively, these results show that phage  
135 predation of *E. faecalis* promotes T7SS inhibition of diverse bystander bacteria.

136

### 137 **Molecular basis of *E. faecalis* phage-triggered T7SS antagonism**

138 Our data demonstrate that induction of *E. faecalis* OG1RF T7SS genes during phage infection  
139 hinder the growth of select non-kin bacterial species. Antibacterial toxins deployed by Gram  
140 negative bacteria via type VI secretion and Gram positive T7SS require physical contact between  
141 cells to achieve antagonism (26, 27, 38, 39). Therefore, we investigated if growth inhibition of  
142 bystander bacteria is contingent upon direct interaction with phage infected *E. faecalis* using a  
143 trans-well assay (27). We added unfiltered supernatants from wild type *E. faecalis* OG1RF and  
144  $\Delta$ essB mutant cultures grown for 24 hrs in the presence and absence of phage VPE25 (MOI =  
145 0.01) to the top of a trans well and deposited phage resistant *E. faecalis*  $\Delta$ pip<sub>V583</sub> in the bottom of  
146 the trans well. The 0.4  $\mu$ m membrane filter that separates the two wells is permeable to proteins  
147 and solutes but prevents bacterial translocation. Supernatant from phage infected wild type *E.*  
148 *faecalis* OG1RF did not inhibit *E. faecalis*  $\Delta$ pip<sub>V583</sub> (Fig. 2A) indicating that T7SS mediated growth  
149 interference relies on cell to cell contact. To exclude the possibility that T7SS substrates might  
150 adhere to the 0.4  $\mu$ m membrane filter in the trans-well assay, we administered unfiltered culture  
151 supernatants directly to *E. faecalis*  $\Delta$ pip<sub>V583</sub> cells ( $5 \times 10^5$  CFU/well) at a ratio of 1:10 and monitored  
152 growth over a period of 10 hours. Growth kinetics of *E. faecalis*  $\Delta$ pip<sub>V583</sub> remained similar  
153 irrespective of the presence or absence of conditioned supernatant from wild type *E. faecalis*  
154 OG1RF or  $\Delta$ essB mutant cultures (Fig. 2B), further supporting the requirement of contact-  
155 dependent engagement of phage mediated T7SS inhibition.

156 We discovered that *E. faecalis* OG1RF inhibits proliferation of non-kin bacterial cells through  
157 increased expression of T7SS genes in response to phage infection, but the toxic effectors are  
158 unknown. LXG domain containing toxins are widespread in bacteria with a diverse range of  
159 predicted antibacterial activities (40, 41). The OG1RF T7SS locus encodes two LXG-domain  
160 proteins, expressed from OG1RF\_11109 and OG1RF\_11121 (Fig. 3A). Polymorphic toxin  
161 systems in Gram negative and Gram positive bacteria can encode “orphan” toxins in addition to  
162 the primary secreted effectors (42). To identify putative orphan effectors, we aligned  
163 OG1RF\_11109 and OG1RF\_11121 with downstream genes in the T7SS locus. OG1RF\_11109  
164 shared conserved sequence with OG1RF\_11111 and OG1RF\_11113, and OG1RF\_11121 had  
165 homology to OG1RF\_11123 (Fig 3A). Homologs to these putative orphan toxins are found as full-  
166 length LXG proteins in *E. faecalis* and *Listeria sp.* (Fig. S3), suggesting they are bonafide T7SS  
167 effectors. Interestingly, we identified an additional LXG gene product, OG1RF\_12414, in a distal  
168 locus that is again notably absent from V583 (Fig. S4A and S4B). Although none of the five  
169 putative toxins in the T7SS locus have recognizable C-terminal domains, OG1RF\_12414 has  
170 predicted structural homology to Tne2, a T6SS effector with NADase activity from *Pseudomonas*  
171 *protegens* (Fig. S4C) (43). Additionally, we identified numerous C-terminal domains in LXG  
172 proteins distributed throughout *Enterococcus* (Fig. S5). These include EndoU and Ntox44  
173 nuclease domains (40, 44, 45), which have been characterized in effectors produced by other  
174 polymorphic toxin systems.

175 Polymorphic toxins are genetically linked to cognate immunity proteins that neutralize  
176 antagonistic activity and prevent self-intoxication (40, 45, 46). Each of the five putative toxins in  
177 the OG1RF T7SS locus is encoded directly upstream of a small protein that could function in  
178 immunity. Whitney *et al.* demonstrated that the cytoplasmic antagonistic activity of *S. intermedius*  
179 LXG toxins TelA and TelB in *E. coli* can be rescued by co-expression of the corresponding  
180 immunity factors (27). Therefore, we examined if OG1RF\_11110, 11112, or 11122, confer  
181 immunity to *E. faecalis*  $\Delta pip_{V583}$  during phage infection of *E. faecalis* OG1RF. Constitutive

182 expression of OG1RF\_11122, and not OG1RF\_11110 or 11112, partially neutralized phage  
183 induced T7SS antagonism (Fig. 3B), confirming an essential role for the OG1RF\_11122 gene  
184 product in immunity, and suggesting that OG1RF\_11121 is at least partly responsible for T7SSb  
185 mediated intra-species antagonism.

186

### 187 **Sub-lethal antibiotic stress promotes T7SS dependent antagonism**

188 Considering two genetically distinct phages trigger the induction of T7SS genes in *E. faecalis*  
189 (24), we reasoned that T7SS induction could be a result of phage mediated cellular damage and  
190 not specifically directed by a phage encoded protein. Antibiotics elicit a range of damage induced  
191 stress responses in bacteria (47-49), therefore, we investigated the effects of subinhibitory  
192 concentrations of antibiotics on T7SS expression in *E. faecalis*.

193 To investigate the influence of sublethal antibiotic concentrations on *E. faecalis* OG1RF T7SS  
194 transcription, we determined the minimum inhibitory concentrations (MIC) of ampicillin,  
195 vancomycin, and daptomycin (Fig.S6A-S6C) and monitored T7SS gene expression in *E. faecalis*  
196 OG1RF cells treated with a sub-lethal dose of antibiotic (50% of the MIC). We found that bacterial  
197 T7SS genes were significantly upregulated in the presence of the cell membrane targeting  
198 antibiotic, daptomycin, relative to the untreated control (Fig. 4A). In contrast, the cell wall  
199 biosynthesis inhibitors ampicillin and vancomycin either did not induce or had a minor impact on  
200 T7SS mRNA levels, respectively (Fig. 4A). Additionally, induction of T7SS transcription occurred  
201 when bacteria are challenged with a sub-inhibitory concentration of the DNA targeting antibiotics  
202 ciprofloxacin and mitomycin C (Fig. 4B, Fig. S6D-S6E). Collectively, these data show that T7SS  
203 induction in *E. faecalis* occurs in response to cell envelope and DNA stress.

204 We next assessed the influence of daptomycin driven T7SS induction on inter-enterococcal  
205 antagonism. Since T7SS expression is less robust in the presence of daptomycin compared to  
206 phage infection (24), a 10:1 ratio of daptomycin treated *E. faecalis* OG1RF was required for  
207 growth inhibition of *E. faecalis*  $\Delta pip_{V583}$  during co-culture (Fig. 4C). Consistent with our previous



208 results, daptomycin induced T7SS inhibition of *E. faecalis*  $\Delta pip_{V583}$  was contact dependent (Fig.  
209 4D). To facilitate T7SS mediated contact-dependent killing of the target strain during daptomycin  
210 exposure, we performed the inhibition assay on nutrient agar plates. The sub-inhibitory  
211 concentration of daptomycin (2.5  $\mu\text{g/ml}$ ) used in liquid culture was toxic to the cells on agar plates,  
212 so we lowered the daptomycin concentration to 0.5  $\mu\text{g/ml}$  to prevent drug toxicity in the agar-  
213 based antagonism assay. Plating T7SS producing *E. faecalis* OG1RF cells and *E. faecalis*  
214  $\Delta pip_{V583}$  bystander cells at a ratio of 10:1 resulted in ~10-fold inhibition of bystander growth (Fig.  
215 4E). These data show that in addition to phages, antibiotics can be sensed by *E. faecalis* thereby  
216 inducing T7SS antagonism of non-kin bacterial cells. These data also suggest that the magnitude  
217 of T7SS gene expression is directly related to the potency of T7SS inhibition.

218

### 219 **IreK facilitates T7SS expression in phage infected *E. faecalis* OG1RF via a non-canonical** 220 **signaling pathway**

221 Having established that phage and daptomycin mediated membrane damage stimulates  
222 heightened *E. faecalis* OG1RF T7SS gene expression and antagonistic activity, we next sought  
223 to identify the genetic determinants that sense this damage and promote T7SS transcription. Two-  
224 component systems, LiaR/S and CroS/R, and the PASTA kinase family protein IreK are well-  
225 characterized modulators of enterococcal cell envelope homeostasis and antimicrobial tolerance  
226 (50-52). Aberrant cardiolipin microdomain remodeling in the bacterial cell membrane in the  
227 absence of the LiaR response regulator results in daptomycin hypersensitivity and virulence  
228 attenuation (53). CroS/R signaling and subsequent modulation of gene expression govern cell  
229 wall integrity and promote resistance to cephalosporins, glycopeptides and beta-lactam  
230 antibiotics (54-56). The *ireK* encoded transmembrane Ser/Thr kinase regulates cell wall  
231 homeostasis, antimicrobial resistance, and contributes to bacterial fitness during long-term  
232 colonization of the intestinal tract (51, 57, 58). Recently it has been shown that direct cross-talk

233 between IreK and the CroS/R system positively impacts enterococcal cephalosporin resistance  
234 (59).

235 Wild type *E. faecalis* OG1RF, an *ireK* in-frame deletion mutant (51) and transposon (Tn)  
236 insertion mutants of *liaR*, *liaS*, *croR*, and *croS* (60) all display similar growth kinetics in the  
237 absence of phage VPE25 infection (Fig. S7A). Although *croR*-Tn and *croS*-Tn exhibit reductions  
238 in the plaquing efficiency of VPE25 particles, none of these genetic elements of enterococcal cell  
239 wall homeostasis and antibiotic resistance were required for VPE25 infection (Fig. S7B). We  
240 queried the expression levels of T7SS genes in these isogenic mutants during phage VPE25  
241 infection (MOI = 1). T7SS gene expression was not enhanced in the  $\Delta ireK$  mutant during phage  
242 infection (Fig. 5A), whereas *liaR*-Tn, *liaS*-Tn, *croR*-Tn, and *croS*-Tn produced heightened levels  
243 of T7SS transcripts similar to the wild type *E. faecalis* OG1RF compared to the uninfected controls  
244 (Fig. S8A-S8F). A sub-lethal concentration of the cephalosporin ceftriaxone did not induce T7SS  
245 gene expression (Fig. S9), indicating that expression of T7SS genes following phage mediated  
246 membrane damage signals through a pathway that is distinct from the IreK response to  
247 cephalosporin stress. Additionally, the  $\Delta ireK$  mutant phenocopies the  $\Delta essB$  mutant strain in the  
248 interbacterial antagonism co-culture assay, wherein the  $\Delta ireK$  mutant is unable to mediate phage  
249 induced T7SS dependent killing of the phage resistant *E. faecalis*  $\Delta pip_{V583}$  non-kin cells (Fig. 5B).  
250 Collectively, these results indicate that IreK senses phage mediated membrane damage  
251 promoting T7SS transcription independent of the CroS/R pathway.

252

## 253 Discussion

254 Despite the fact that bacteria exist in complex microbial communities and engage in social  
255 interactions (61, 62), phage predation studies have primarily been performed in monoculture (24,  
256 63-65). Studies report phage-mediated effects on non-target bacteria linked to interbacterial  
257 interactions and evolved phage tropism for non-cognate bacteria (66-68), whereas other studies  
258 have identified minimal changes in microbiota diversity during phage therapy (66, 69).

259 Our results extend previous work that observed the induction of *E. faecalis* OG1RF T7SS  
260 gene expression in response to phage infection (24). By using an *in vitro* antibacterial antagonism  
261 assay, we discovered that phage predation of *E. faecalis* OG1RF has an inhibitory effect on non-  
262 phage targeted bacterial species during co-culture. Our work shows that phage mediated  
263 inhibition of Gram positive bystander bacteria relies on the expression and activity of T7SS genes.  
264 This work emphasizes how phage infection of target bacteria can extend beyond intended phage  
265 targets and inhibit other members of a microbial community. This discovery could have profound  
266 ramifications on how microbial communities like the microbiota respond to phage therapy.

267 Our data suggest that membrane stress associated with phage infection or sub-lethal  
268 daptomycin treatment stimulates T7SS mediated antibacterial antagonism of *E. faecalis* OG1RF.  
269 Given that daptomycin is used to target vancomycin-resistant enterococcal infections, this finding  
270 provides a model by which antibiotic-resistant enterococci may overgrow and dominate the  
271 microbiota after antibiotic treatment. Although further investigation is required to understand how  
272 T7SS induction might contribute to enterococcal fitness in polymicrobial environments, disruption  
273 of T7SS loci in other bacteria compromises bacterial membrane integrity and attenuates virulence  
274 (31, 70). It is possible that environmental conditions encountered in the intestinal tract, including  
275 bile salts, antimicrobial proteins, and competition for nutrient resources could influence T7SS  
276 activity in *E. faecalis* to facilitate niche establishment and/or persistence within a complex  
277 microbial community. Indeed, *E. faecalis* T7SS mutants have a defect in their ability to colonize  
278 the murine reproductive tract (manuscript in preparation). Further, we discovered that  
279 transcriptional activation of the T7SS during phage infection relies on IreK. Previously  
280 characterized IreK-mediated stress response pathways, including cephalosporin stress or the  
281 CroS/R signaling, did not contribute to T7SS expression. We hypothesize that IreK senses diverse  
282 environmental stressors and coordinates distinct outputs in response to specific stimuli.  
283 Considering that IreK signaling is important for *E. faecalis* intestinal colonization (58), it is possible  
284 that IreK-dependent T7SS expression in response to intestinal cues modulate interbacterial

285 interactions and enterococcal persistence in the intestine. However, the molecular mechanism by  
286 which IreK facilitates T7SS transcription remains unanswered.

287       Antibacterial properties of T7SS substrates have been demonstrated (26, 27). Here we show  
288 that the expression of an immunity gene *OG1RF\_11122* in T7SS targeted *E. faecalis* cells likely  
289 confers protection from inhibition by the upstream LXG toxin encoded by *OG1RF\_11121*. Aside  
290 from its LXG domain, *OG1RF\_11121* does not harbor any other recognizable protein domains,  
291 hence the mechanism underlying its toxicity is unclear. Whitney *et al.* demonstrated that LXG  
292 toxin antagonism is contact-dependent, having minimal to no impact on target cells in liquid media  
293 (27). Although we found that physical engagement is crucial for *E. faecalis* T7SS mediated  
294 antagonism, we observed a significant reduction in target cell growth in liquid media both during  
295 phage and daptomycin treatment of T7SS proficient *E. faecalis*. Together, these data suggest  
296 that heightened T7SS transcription upon phage exposure compared to daptomycin exposure may  
297 account for robust *E. faecalis* *OG1RF* inhibition of other bacteria in liquid culture.

298       Enterococci occupy polymicrobial infections often interacting with other bacteria (71-74).  
299 Although commensal *E. faecalis* antagonize virulent *S. aureus* through the production of  
300 superoxide (75), the two species also exhibit growth synergy via exchange of critical nutrients  
301 (76). Here, we show that phage treatment of *E. faecalis* *OG1RF* can indirectly impact the growth  
302 of neighboring phage-resistant bacteria, including *S. aureus*, in a T7SS-dependent manner,  
303 suggesting that phage therapy directed against enterococci driving T7SS activity could be useful  
304 for the treatment of polymicrobial infections. However, the counter argument is that phage therapy  
305 directed against enterococci could push a bacterial community toward dysbiosis, as phage  
306 induced T7SS activity could directly inhibit beneficial bystander bacteria. This raises questions  
307 about the consequences of phage mediated off-target effects on bacteria. Could phage induced  
308 T7SS activity be used to reduce phage expansion into other closely related strains as a means to  
309 dilute phages out of a population, or is it simply that phage induction of the T7SS serves as a  
310 mechanism that benefits a select few within a population to aid in their reoccupation of a niche

311 upon overcoming phage infection? Future studies aimed at exploring enterococcal T7SS  
312 antagonism in polymicrobial communities should help elucidate the impact of phages on microbial  
313 community composition.

314

## 315 **Acknowledgments**

316 This work was supported by National Institutes of Health grants R01AI141479 (B.A.D.) and  
317 R01AI122742 (G.M.D.). J.L.E.W. was supported by American Heart Association Grant  
318 19POST34450124 / Julia Willett / 2018. We would like to thank Andrés Vázquez-Torres, Laurel  
319 Lenz, Alex Horswill, Stefan Pukatzki, Kelly Doran, and their lab members for sharing bacterial  
320 strains used in this study.

321

## 322 **Materials and Methods**

323 **Bacteria and bacteriophage.** Bacteria and phages used in this study are listed in Table S1.

324 Bacteria were grown with aeration in Todd-Hewitt broth (THB) or on THB agar supplemented with  
325 10mM MgSO<sub>4</sub> at 37°C. The following antibiotic concentrations were added to media for the  
326 selection of specific bacterial strains or species: *E. faecalis* OG1RF (25 µg/ml fusidic acid, 50  
327 µg/ml rifampin), *E. faecalis* V583  $\Delta$ *pip*<sub>V583</sub> (100 µg/ml gentamycin), *S. aureus* AH2146 LAC  
328  $\Phi$ 11:LL29 (1 µg/ml tetracyclin), *L. monocytogenes* 10403S (100 µg/ml streptomycin), *V. cholerae*  
329 C6706 int I4::TnFL63 and *S. enterica* serovar Typhimurium 140285 put::Kan (50 µg/ml  
330 kanamycin). *S. agalactiae* COH1 was distinguished from *E. faecalis* on Chrome indicator Agar  
331 (CHROMagar StrepB SB282). We were unable to differentially select *E. coli*, *S. pyogenes* and *S.*  
332 *mitis* from *E. faecalis* based on antibiotic sensitivity. Therefore, colony counts of these bacteria in  
333 co-culture experiments were acquired by subtracting the *E. faecalis* colony numbers on selective  
334 media from total number of colonies on non-selective media. Strains harboring pLZ12A and its  
335 derivatives were grown in the presence of 20 µg/ml chloramphenicol.

336

337 **Bioinformatic analyses.** Genome sequences of *E. faecalis* V583 (NC\_004668.1) and OG1RF  
338 (NC\_017316.1) were obtained from NCBI. Alignments were generated and visualized using  
339 EasyFig (77). OG1RF protein domains were identified using KEGG (78) and ExPASy PROSITE  
340 (79). Structure modeling of OG1RF\_12414 was done with Phyre2 (80). The EsxA phylogenetic  
341 tree was constructed in MEGA version X (81) using non-redundant protein sequences obtained  
342 from NCBI BLAST (82) with OG1RF\_11100 as input and was edited using the Interactive Tree Of  
343 Life browser (83). OG1RF\_11109 was used as an input for the NCBI Conserved Domain  
344 Architecture Retrieval Tool (84) to identify protein domains that co-occur with LXG domains in  
345 *Enterococcus*.

346  
347 **Antibiotic sensitivity profiles.** Antibiotic susceptibility profiles for ampicillin, vancomycin, and  
348 daptomycin were determined using a broth microdilution assay. Overnight (O/N) *E. faecalis*  
349 OG1RF cultures were diluted to  $5 \times 10^6$  CFU/ml and 100  $\mu$ l was added to each well of a 96-well  
350 plate to give a final cell density of  $5 \times 10^5$  CFU/ml. Antibiotic stocks were added to the first column  
351 of each row, mixed thoroughly, and were serially diluted 2-fold across the rows. The last column  
352 was used as a no drug control. Cultures containing daptomycin were supplemented with 50  $\mu$ g/ml  
353 CaCl<sub>2</sub>. Bacterial growth was monitored by measuring absorbance (OD<sub>600</sub>) using a Synergy H1  
354 microplate reader set to 37°C with continuous shaking O/N. Growth curves are presented as the  
355 average of three biological replicates. A concentration of antibiotic just below the drug amount  
356 that inhibits bacterial growth was deemed sub-lethal and used to examine T7SS genes  
357 expression.

358  
359 **Co-culture bacterial antagonism assays.** For inter- and intraspecies antagonism assays in  
360 liquid media, O/N cultures of different bacteria were diluted in THB containing 10mM MgSO<sub>4</sub> to  
361 an OD<sub>600</sub> of 0.2 and mixed together in a 1:1 or 10:1 ratio. The mixed cell suspensions were either  
362 left untreated or treated with phage VPE25 (MOI 0.01) / daptomycin (2.5  $\mu$ g/ml) and grown at

363 37°C with aeration. For antagonism experiments on agar plates, O/N cultures of different strains  
364 were diluted to an OD<sub>600</sub> of 0.2 and mixed together in a 1:1 or 10:1 ratio. A total of 10<sup>7</sup> cells from  
365 mixed culture suspension was added to 5 ml THB + 0.35% agar at 55°C and were poured over  
366 the surface of a THB agar plate in the absence or presence of daptomycin (0.5 µg/ml). The plates  
367 were incubated at 37°C under static conditions for 24 hours. Cells were harvested by scraping off  
368 the top agar, resuspending in 5 ml of PBS, and the cfus were obtained by plating serially diluted  
369 cell suspension on appropriate selective or differentiating agar plates. Relative viability was  
370 calculated from the ratio of target strain cfu in the treated versus the untreated co-culture. The  
371 assays were performed in biological triplicates.

372

373 **RNA extraction and quantitative PCR.** RNA was extracted from phage treated or untreated *E.*  
374 *faecalis* OG1RF cells by using an RNeasy Mini Kit (Qiagen) with the following published  
375 modifications (24). cDNA was generated from 1 µg of RNA using qScript cDNA SuperMix  
376 (QuantaBio) and transcript levels were analyzed by qPCR using PowerUp™ SYBR Green Master  
377 Mix (Applied Biosystems). Transcript abundances were normalized to the 16S rRNA gene  
378 transcripts and fold-change was calculated by comparing to untreated controls. All data are  
379 represented as the average of three biological replicates.

380

381 **Bacterial growth curves.** 25 ml of 10mM MgSO<sub>4</sub> supplemented THB was inoculated with O/N  
382 cultures of *E. faecalis* diluted to an OD<sub>600</sub> of 0.025 and distributed to a 96-well plate in 0.1 ml  
383 volumes. Cultures were incubated at 37° C with aeration. OD<sub>600</sub> was measured periodically for 18  
384 hours in a Synergy H1 microplate reader.

385

386 **Efficiency of plating (EOP) assays.** To investigate if phage VPE25 can infect and lyse *E.*  
387 *faecalis* mutants and various other bacterial species, 10<sup>7</sup> PFU/ml of phage was serially diluted  
388 and the phage was titered on each strain using a THB agar overlay plaque assay. EOP is

389 expressed as the percentage of phage titer from each strain relative to the wild type *E. faecalis*  
390 OG1RF control. Data are presented as the average of three biological replicates.

391  
392 **Construction of *E. faecalis* mutants and complementation.** Isolation of *E. faecalis* genomic  
393 DNA was performed using a ZymoBIOMICS™ DNA Miniprep Kit (Zymo Research). All PCR  
394 reactions used for cloning were performed with high fidelity KOD Hot Start DNA Polymerase (EMD  
395 Millipore). *E. faecalis*  $\Delta$ *essB* was generated by allelic replacement by cloning an in frame *essB*  
396 deletion product into pLT06 using Gibson Assembly® Master Mix (New England Biolabs),  
397 integrating this construct into the chromosome, and resolving the deletion mutant by homologous  
398 recombination (85-87). For ectopic expression of putative immunity proteins, coding regions of  
399 OG1RF\_11110, OG1RF\_11112, and OG1RF\_11122 were cloned downstream of the *bacA*  
400 promoter ( $P_{bacA}$ ) by restriction digestion and ligation into the shuttle vector pLZ12A (20). Primer  
401 sequences and restriction enzymes used for cloning are listed in Table S1. Plasmids were  
402 introduced into electrocompetent *E. faecalis* cells as previously described (20).

403  
404 **Statistical analysis.** Statistical tests were performed using GraphPad – Prism version 8.2.1. For  
405 qPCR and bacterial competition assays, unpaired Student's t-tests were used. *P* values are  
406 indicated in the figure legends.

407

## 408 **References**

- 409 1. Lebreton F, Willems RJL, & Gilmore MS (2014) *Enterococcus* diversity, origins in nature,  
410 and gut colonization. *Enterococci: from commensals to leading causes of drug resistant*  
411 *infection*, eds Gilmore MS, Clewell DB, Ike Y, & Shankar NBoston).
- 412 2. Onderdonk AB, Bartlett JG, Louie T, Sullivan-Seigler N, & Gorbach SL (1976) Microbial  
413 synergy in experimental intra-abdominal abscess. *Infect Immun* 13(1):22-26.



- 414 3. Weiner-Lastinger LM, *et al.* (2020) Antimicrobial-resistant pathogens associated with adult  
415 healthcare-associated infections: Summary of data reported to the National Healthcare  
416 Safety Network, 2015-2017. *Infect Control Hosp Epidemiol* 41(1):1-18.
- 417 4. Arias CA, *et al.* (2011) Genetic basis for *in vivo* daptomycin resistance in enterococci. *N*  
418 *Engl J Med* 365(10):892-900.
- 419 5. Liu Y, *et al.* (2012) First report of the multidrug resistance gene *cfr* in *Enterococcus faecalis*  
420 of animal origin. *Antimicrob Agents Chemother* 56(3):1650-1654.
- 421 6. Patel SN, *et al.* (2013) Linezolid resistance in *Enterococcus faecium* isolated in Ontario,  
422 Canada. *Diagn Microbiol Infect Dis* 77(4):350-353.
- 423 7. Ubeda C, *et al.* (2010) Vancomycin-resistant *Enterococcus* domination of intestinal  
424 microbiota is enabled by antibiotic treatment in mice and precedes bloodstream invasion  
425 in humans. *J Clin Invest* 120(12):4332-4341.
- 426 8. Zirakzadeh A & Patel R (2006) Vancomycin-resistant enterococci: colonization, infection,  
427 detection, and treatment. *Mayo Clin Proc* 81(4):529-536.
- 428 9. Taur Y, *et al.* (2012) Intestinal domination and the risk of bacteremia in patients  
429 undergoing allogeneic hematopoietic stem cell transplantation. *Clin Infect Dis* 55(7):905-  
430 914.
- 431 10. Munoz-Price LS, Lolans K, & Quinn JP (2005) Emergence of resistance to daptomycin  
432 during treatment of vancomycin-resistant *Enterococcus faecalis* infection. *Clin Infect Dis*  
433 41(4):565-566.
- 434 11. Palmer KL, Daniel A, Hardy C, Silverman J, & Gilmore MS (2011) Genetic basis for  
435 daptomycin resistance in enterococci. *Antimicrob Agents Chemother* 55(7):3345-3356.

- 436 12. Jasni AS, Mullany P, Hussain H, & Roberts AP (2010) Demonstration of conjugative  
437 transposon (Tn5397)-mediated horizontal gene transfer between *Clostridium difficile* and  
438 *Enterococcus faecalis*. *Antimicrob Agents Chemother* 54(11):4924-4926.
- 439 13. Palmer KL, Kos VN, & Gilmore MS (2010) Horizontal gene transfer and the genomics of  
440 enterococcal antibiotic resistance. *Curr Opin Microbiol* 13(5):632-639.
- 441 14. Chang S, *et al.* (2003) Infection with vancomycin-resistant *Staphylococcus aureus*  
442 containing the *vanA* resistance gene. *N Engl J Med* 348(14):1342-1347.
- 443 15. Kurenbach B, *et al.* (2003) Intergeneric transfer of the *Enterococcus faecalis* plasmid  
444 pIP501 to *Escherichia coli* and *Streptomyces lividans* and sequence analysis of its *tra*  
445 region. *Plasmid* 50(1):86-93.
- 446 16. Kortright KE, Chan BK, Koff JL, & Turner PE (2019) Phage therapy: a renewed approach  
447 to combat antibiotic-resistant bacteria. *Cell Host Microbe* 25(2):219-232.
- 448 17. Cheng M, *et al.* (2017) The bacteriophage EF-P29 efficiently protects against lethal  
449 vancomycin-resistant *Enterococcus faecalis* and alleviates gut microbiota imbalance in a  
450 murine bacteremia model. *Front Microbiol* 8:837.
- 451 18. Gelman D, *et al.* (2018) Combined bacteriophages and antibiotics as an efficient therapy  
452 against VRE *Enterococcus faecalis* in a mouse model. *Res Microbiol* 169(9):531-539.
- 453 19. Uchiyama J, Rashel M, Takemura I, Wakiguchi H, & Matsuzaki S (2008) *In silico* and *in*  
454 *vivo* evaluation of bacteriophage phiEF24C, a candidate for treatment of *Enterococcus*  
455 *faecalis* infections. *Appl Environ Microbiol* 74(13):4149-4163.
- 456 20. Chatterjee A, *et al.* (2019) Bacteriophage resistance alters antibiotic-mediated intestinal  
457 expansion of enterococci. *Infect Immun* 87(6):e00085-00019.

- 458 21. Lin DM, Koskella B, & Lin HC (2017) Phage therapy: an alternative to antibiotics in the  
459 age of multi-drug resistance. *World J Gastrointest Pharmacol Ther* 8(3):162-173.
- 460 22. Loc-Carrillo C & Abedon ST (2011) Pros and cons of phage therapy. *Bacteriophage*  
461 1(2):111-114.
- 462 23. Wu S, Zachary E, Wells K, & Loc-Carrillo C (2013) Phage Therapy: future inquiries.  
463 *Postdoc J* 1(6):24-35.
- 464 24. Chatterjee A, *et al.* (2020) Parallel genomics uncover novel enterococcal-bacteriophage  
465 interactions. *mBio* 11(2).
- 466 25. Unnikrishnan M, Constantinidou C, Palmer T, & Pallen MJ (2017) The enigmatic esx  
467 proteins: looking beyond mycobacteria. *Trends Microbiol* 25(3):192-204.
- 468 26. Cao Z, Casabona MG, Kneuper H, Chalmers JD, & Palmer T (2016) The type VII secretion  
469 system of *Staphylococcus aureus* secretes a nuclease toxin that targets competitor  
470 bacteria. *Nat Microbiol* 2:16183.
- 471 27. Whitney JC, *et al.* (2017) A broadly distributed toxin family mediates contact-dependent  
472 antagonism between Gram-positive bacteria. *Elife* 6.
- 473 28. Burts ML, DeDent AC, & Missiakas DM (2008) EsaC substrate for the ESAT-6 secretion  
474 pathway and its role in persistent infections of *Staphylococcus aureus*. *Mol Microbiol*  
475 69(3):736-746.
- 476 29. Ishii K, *et al.* (2014) Induction of virulence gene expression in *Staphylococcus aureus* by  
477 pulmonary surfactant. *Infect Immun* 82(4):1500-1510.

- 478 30. Lopez MS, *et al.* (2017) Host-derived fatty acids activate type VII secretion in  
479 *Staphylococcus aureus*. *Proc Natl Acad Sci U S A* 114(42):11223-11228.
- 480 31. Tchoupa AK, *et al.* (2020) The type VII secretion system protects *Staphylococcus aureus*  
481 against antimicrobial host fatty acids. *bioRxiv*:572172.
- 482 32. Bourgogne A, *et al.* (2008) Large scale variation in *Enterococcus faecalis* illustrated by the  
483 genome analysis of strain OG1RF. *Genome Biol* 9(7):R110.
- 484 33. Paulsen IT, *et al.* (2003) Role of mobile DNA in the evolution of vancomycin-resistant  
485 *Enterococcus faecalis*. *Science* 299(5615):2071-2074.
- 486 34. Lebreton F, *et al.* (2017) Tracing the enterococci from paleozoic origins to the hospital.  
487 *Cell* 169(5):849-861 e813.
- 488 35. Das C, Ghosh TS, & Mande SS (2016) *In silico* dissection of type VII secretion system  
489 components across bacteria: new directions towards functional characterization. *J Biosci*  
490 41(1):133-143.
- 491 36. Burts ML, Williams WA, DeBord K, & Missiakas DM (2005) EsxA and EsxB are secreted  
492 by an ESAT-6-like system that is required for the pathogenesis of *Staphylococcus aureus*  
493 infections. *Proc Natl Acad Sci U S A* 102(4):1169-1174.
- 494 37. Duerkop BA, Huo W, Bhardwaj P, Palmer KL, & Hooper LV (2016) Molecular basis for  
495 lytic bacteriophage resistance in enterococci. *MBio* 7(4).
- 496 38. Garcia EC (2018) Contact-dependent interbacterial toxins deliver a message. *Curr Opin*  
497 *Microbiol* 42:40-46.

- 498 39. Garcia-Bayona L & Comstock LE (2018) Bacterial antagonism in host-associated  
499 microbial communities. *Science* 361(6408).
- 500 40. Zhang D, de Souza RF, Anantharaman V, Iyer LM, & Aravind L (2012) Polymorphic toxin  
501 systems: comprehensive characterization of trafficking modes, processing, mechanisms  
502 of action, immunity and ecology using comparative genomics. *Biol Direct* 7:18.
- 503 41. Klein TA, Pazos M, Surette MG, Vollmer W, & Whitney JC (2018) Molecular basis for  
504 immunity protein recognition of a type VII secretion system exported antibacterial toxin. *J*  
505 *Mol Biol* 430(21):4344-4358.
- 506 42. Jamet A & Nassif X (2015) New players in the toxin field: polymorphic toxin systems in  
507 bacteria. *mBio* 6(3):e00285-00215.
- 508 43. Tang JY, Bullen NP, Ahmad S, & Whitney JC (2018) Diverse NADase effector families  
509 mediate interbacterial antagonism via the type VI secretion system. *J Biol Chem*  
510 293(5):1504-1514.
- 511 44. Michalska K, *et al.* (2018) Functional plasticity of antibacterial EndoU toxins. *Mol Microbiol*  
512 109(4):509-527.
- 513 45. Zhang D, Iyer LM, & Aravind L (2011) A novel immunity system for bacterial nucleic acid  
514 degrading toxins and its recruitment in various eukaryotic and DNA viral systems. *Nucleic*  
515 *Acids Res* 39(11):4532-4552.
- 516 46. Klein TA, Ahmad S, & Whitney JC (2020) Contact-dependent interbacterial antagonism  
517 mediated by protein secretion machines. *Trends Microbiol* 28(5):387-400.
- 518 47. Andersson DI & Hughes D (2014) Microbiological effects of sublethal levels of antibiotics.  
519 *Nat Rev Microbiol* 12(7):465-478.

- 520 48. Bernier SP & Surette MG (2013) Concentration-dependent activity of antibiotics in natural  
521 environments. *Front Microbiol* 4:20.
- 522 49. Yim G, Wang HH, & Davies J (2007) Antibiotics as signalling molecules. *Philos Trans R*  
523 *Soc Lond B Biol Sci* 362(1483):1195-1200.
- 524 50. Kellogg SL & Kristich CJ (2016) Functional dissection of the CroRS two-component  
525 system required for resistance to cell wall stressors in *Enterococcus faecalis*. *J Bacteriol*  
526 198(8):1326-1336.
- 527 51. Kristich CJ, Wells CL, & Dunny GM (2007) A eukaryotic-type Ser/Thr kinase in  
528 *Enterococcus faecalis* mediates antimicrobial resistance and intestinal persistence. *Proc*  
529 *Natl Acad Sci U S A* 104(9):3508-3513.
- 530 52. Tran TT, *et al.* (2013) Daptomycin-resistant *Enterococcus faecalis* diverts the antibiotic  
531 molecule from the division septum and remodels cell membrane phospholipids. *mBio* 4(4).
- 532 53. Reyes J, *et al.* (2015) A *liaR* deletion restores susceptibility to daptomycin and  
533 antimicrobial peptides in multidrug-resistant *Enterococcus faecalis*. *J Infect Dis*  
534 211(8):1317-1325.
- 535 54. Comenge Y, *et al.* (2003) The CroRS two-component regulatory system is required for  
536 intrinsic beta-lactam resistance in *Enterococcus faecalis*. *J Bacteriol* 185(24):7184-7192.
- 537 55. Hancock L & Perego M (2002) Two-component signal transduction in *Enterococcus*  
538 *faecalis*. *J Bacteriol* 184(21):5819-5825.
- 539 56. Hancock LE & Perego M (2004) Systematic inactivation and phenotypic characterization  
540 of two-component signal transduction systems of *Enterococcus faecalis* V583. *J Bacteriol*  
541 186(23):7951-7958.

- 542 57. Kristich CJ, Little JL, Hall CL, & Hoff JS (2011) Reciprocal regulation of cephalosporin  
543 resistance in *Enterococcus faecalis*. *mBio* 2(6):e00199-00111.
- 544 58. Banla IL, *et al.* (2018) Modulators of *Enterococcus faecalis* cell envelope integrity and  
545 antimicrobial resistance influence stable colonization of the mammalian gastrointestinal  
546 tract. *Infect Immun* 86(1).
- 547 59. Kellogg SL & Kristich CJ (2018) Convergence of PASTA kinase and two-component  
548 signaling in response to cell wall stress in *Enterococcus faecalis*. *J Bacteriol* 200(12).
- 549 60. Dale JL, *et al.* (2018) Comprehensive functional analysis of the *Enterococcus faecalis* core  
550 genome using an ordered, sequence-defined collection of insertional mutations in strain  
551 OG1RF. *mSystems* 3(5).
- 552 61. Madsen JS, Sorensen SJ, & Burmolle M (2018) Bacterial social interactions and the  
553 emergence of community-intrinsic properties. *Curr Opin Microbiol* 42:104-109.
- 554 62. Xavier JB & Foster KR (2007) Cooperation and conflict in microbial biofilms. *Proc Natl*  
555 *Acad Sci U S A* 104(3):876-881.
- 556 63. Leskinen K, Blasdel BG, Lavigne R, & Skurnik M (2016) RNA-sequencing reveals the  
557 progression of phage-host interactions between phiR1-37 and *Yersinia enterocolitica*.  
558 *Viruses* 8(4):111.
- 559 64. Mojardin L & Salas M (2016) Global transcriptional analysis of virus-host interactions  
560 between phage  $\Phi$ phi29 and *Bacillus subtilis*. *J Virol* 90(20):9293-9304.
- 561 65. Sacher JC, *et al.* (2018) Transcriptomic analysis of the *Campylobacter jejuni* response to  
562 T4-like phage NCTC 12673 infection. *Viruses* 10(6).

- 563 66. De Sordi L, Khanna V, & Debarbieux L (2017) The gut microbiota facilitates drifts in the  
564 genetic diversity and infectivity of bacterial viruses. *Cell Host Microbe* 22(6):801-808 e803.
- 565 67. Hsu BB, *et al.* (2019) Dynamic modulation of the gut microbiota and metabolome by  
566 bacteriophages in a mouse model. *Cell Host Microbe* 25(6):803-814 e805.
- 567 68. Reyes A, Wu M, McNulty NP, Rohwer FL, & Gordon JI (2013) Gnotobiotic mouse model  
568 of phage-bacterial host dynamics in the human gut. *Proc Natl Acad Sci U S A*  
569 110(50):20236-20241.
- 570 69. Dissanayake U, Ukhanova M, Moye ZD, Sulakvelidze A, & Mai V (2019) Bacteriophages  
571 reduce pathogenic *Escherichia coli* counts in mice without distorting gut microbiota. *Front*  
572 *Microbiol* 10:1984.
- 573 70. Bottai D, *et al.* (2012) Disruption of the ESX-5 system of *Mycobacterium tuberculosis*  
574 causes loss of PPE protein secretion, reduction of cell wall integrity and strong attenuation.  
575 *Mol Microbiol* 83(6):1195-1209.
- 576 71. Flores-Mireles AL, Walker JN, Caparon M, & Hultgren SJ (2015) Urinary tract infections:  
577 epidemiology, mechanisms of infection and treatment options. *Nat Rev Microbiol*  
578 13(5):269-284.
- 579 72. Giacometti A, *et al.* (2000) Epidemiology and microbiology of surgical wound infections. *J*  
580 *Clin Microbiol* 38(2):918-922.
- 581 73. Keogh D, *et al.* (2016) Enterococcal metabolite cues facilitate interspecies niche  
582 modulation and polymicrobial infection. *Cell Host Microbe* 20(4):493-503.
- 583 74. Goh HMS, Yong MHA, Chong KKL, & Kline KA (2017) Model systems for the study of  
584 enterococcal colonization and infection. *Virulence* 8(8):1525-1562.



- 585 75. King KC, *et al.* (2016) Rapid evolution of microbe-mediated protection against pathogens  
586 in a worm host. *ISME J* 10(8):1915-1924.
- 587 76. Hammer ND, *et al.* (2014) Inter- and intraspecies metabolite exchange promotes virulence  
588 of antibiotic-resistant *Staphylococcus aureus*. *Cell Host Microbe* 16(4):531-537.
- 589 77. Sullivan MJ, Petty NK, & Beatson SA (2011) Easyfig: a genome comparison visualizer.  
590 *Bioinformatics* 27(7):1009-1010.
- 591 78. Kanehisa M & Goto S (2000) KEGG: kyoto encyclopedia of genes and genomes. *Nucleic*  
592 *Acids Res* 28(1):27-30.
- 593 79. Sigrist CJ, *et al.* (2013) New and continuing developments at PROSITE. *Nucleic Acids*  
594 *Res* 41(Database issue):D344-347.
- 595 80. Kelley LA, Mezulis S, Yates CM, Wass MN, & Sternberg MJ (2015) The Phyre2 web portal  
596 for protein modeling, prediction and analysis. *Nat Protoc* 10(6):845-858.
- 597 81. Kumar S, Stecher G, Li M, Knyaz C, & Tamura K (2018) MEGA X: Molecular Evolutionary  
598 Genetics Analysis across Computing Platforms. *Mol Biol Evol* 35(6):1547-1549.
- 599 82. Coordinators NR (2018) Database resources of the National Center for Biotechnology  
600 Information. *Nucleic Acids Res* 46(D1):D8-D13.
- 601 83. Letunic I & Bork P (2019) Interactive Tree Of Life (iTOL) v4: recent updates and new  
602 developments. *Nucleic Acids Res* 47(W1):W256-W259.
- 603 84. Geer LY, Domrachev M, Lipman DJ, & Bryant SH (2002) CDART: protein homology by  
604 domain architecture. *Genome Res* 12(10):1619-1623.

- 605 85. Barnes WM (1994) PCR amplification of up to 35-kb DNA with high fidelity and high yield  
606 from lambda bacteriophage templates. *Proc Natl Acad Sci U S A* 91(6):2216-2220.
- 607 86. Gibson DG, *et al.* (2009) Enzymatic assembly of DNA molecules up to several hundred  
608 kilobases. *Nat Methods* 6(5):343-345.
- 609 87. Thurlow LR, Thomas VC, & Hancock LE (2009) Capsular polysaccharide production in  
610 *Enterococcus faecalis* and contribution of CpsF to capsule serospecificity. *J Bacteriol*  
611 191(20):6203-6210.

612

### 613 **Figure Legends**

614

615 **Figure 1. Phage mediated inhibition of bystander bacteria is dependent on enterococcal**  
616 **T7SS. (A)** Diagram showing the location of T7SS genes in *E. faecalis* OG1RF (NC\_017316.1)  
617 compared to *E. faecalis* V583 (NC\_004668.1). Sequences were obtained from NCBI, and  
618 homology comparisons were rendered in EasyFig. Nucleotide alignments generated by Clustal  
619 Omega are enlarged for clarity (dashed lines). Stop codons of genes EF1328/OG1RF\_11099 and  
620 EF1337/OG1RF\_11127 are boxed. **(B)** Schematic representation of the co-culture assay used to  
621 assess the viability of bystander bacteria during phage induced T7SS activity of wild type *E.*  
622 *faecalis* OG1RF and  $\Delta$ essB. Relative viability of bystander strains is calculated by measuring the  
623 ratio of bystander cfus in the phage infected culture compared to the bystander cfus from an  
624 uninfected control culture. **(C)** The relative abundance of viable bystander bacterium *E. faecalis*  
625  $\Delta$ pip<sub>V583</sub>. Complementation of the *E. faecalis*  $\Delta$ essB mutant restores T7SS dependent bystander  
626 inhibition. **(D)** T7SS inhibition of other bacterial species in the presence and absence of phage  
627 infected *E. faecalis* OG1RF or  $\Delta$ essB. Data represent three biological replicates. \* $P < 0.00001$  by  
628 unpaired Student's t-test.

629

630 **Figure 2. Phage induced T7SS inhibitory activity of *E. faecalis* is contact dependent.** Intra-  
631 species competition experiment performed in the presence of unfiltered supernatant from phage  
632 treated and untreated *E. faecalis* wild type OG1RF or  $\Delta$ essB added **(A)** to the top of a well  
633 separated by a 0.4  $\mu$ m membrane from the bottom well containing *E. faecalis*  $\Delta$ pip<sub>V583</sub> culture or  
634 **(B)** directly into *E. faecalis*  $\Delta$ pip<sub>V583</sub> culture in microtiter plate wells.

635

636 **Figure 3. Identification of *E. faecalis* T7SS toxins and an immunity protein that confers**  
637 **protection to bystander bacteria.** **(A)** LXG domains in OG1RF\_11109 and OG1RF\_11121 were  
638 identified using KEGG and ExPASy PROSITE. Other putative toxic effectors in OG1RF were  
639 identified by homology to OG1RF\_11109 or OG1RF\_11121. Homology diagrams were rendered  
640 in EasyFig. **(B)** *E. faecalis* OG1RF T7SS mediated growth inhibition of phage resistant *E. faecalis*  
641  $\Delta$ pip<sub>V583</sub> during infection is alleviated by expressing OG1RF\_11122 in *E. faecalis*  $\Delta$ pip<sub>V583</sub> but not  
642 in the presence of empty vector, or expressing OG1RF\_11110, or OG1RF\_11112. E, represents  
643 empty vector. C, is expression vector. Data represent three biological replicates. \**P* < 0.0001 by  
644 unpaired Student's t-test.

645

646 **Figure 4. Sub-lethal antibiotic treatment enhances T7SS gene expression leading to**  
647 **inhibition of bystander bacteria.** Altered expression of T7SS genes upon exposure to sub-  
648 inhibitory concentrations of **(A)** ampicillin (0.19  $\mu$ g/ml), vancomycin (0.78  $\mu$ g/ml) or daptomycin  
649 (6.25  $\mu$ g/ml) and **(B)** ciprofloxacin (2  $\mu$ g/ml) or mitomycin C (4  $\mu$ g/ml) for 40 minutes relative to  
650 the untreated control. **(C-E)** Contact-dependent T7SS mediated inhibition of bystander bacteria  
651 in the presence of daptomycin. Relative viability of *E. faecalis*  $\Delta$ pip<sub>V583</sub> was measured during co-  
652 culture with *E. faecalis* OG1RF or  $\Delta$ essB antagonists in the presence and absence of daptomycin  
653 treatment in **(C)** liquid culture (2.5  $\mu$ g/ml), **(D)** trans-well plates to prevent physical engagement  
654 between cells (2.5  $\mu$ g/ml) and **(E)** on agar media (0.5  $\mu$ g/ml). E – empty vector and C –

655 complementation vector. Data represent three biological replicates. \* $P < 0.01$ , \*\* $P < 0.001$  to  
656 0.0001 by unpaired Student's t-test.

657  
658 **Figure 5. IreK is necessary for the induction of *E. faecalis* T7SS expression and subsequent**  
659 **inhibition of bystander bacteria during phage infection. (A)** Phage infection leads to  
660 enhanced expression of T7SS genes in the wild type *E. faecalis* OG1RF but not in an  $\Delta ireK$  mutant  
661 strain. **(B)** Growth inhibition of *E. faecalis*  $\Delta pip_{V583}$  during phage infection of *E. faecalis* OG1RF is  
662 abrogated in an  $\Delta ireK$  mutant of OG1RF. Data represent three replicates \* $P < 0.00001$  by  
663 unpaired Student's t-test.

664  
665 **Figure S1. Phylogenetic tree of EsxA sequences in *Enterococcus*.** Non-redundant  
666 sequences (n=96) were identified using NCBI BLAST with OG1RF EsxA (OG1RF\_11100) as the  
667 input. The tree was constructed in MEGAX using the Maximum Likelihood method and JTT  
668 matrix-based model and is drawn to scale, with branch lengths measured in the number of  
669 substitutions per site. The tree with the highest log likelihood (-3544.39) is shown. *E. faecalis*  
670 sequences are highlighted in purple, and the GenBank identifier for EsxA from OG1RF  
671 (AEA93787.1) is shown in bold red font.

672  
673 **Figure S2. Phage VPE25 infects wild type *E. faecalis* OG1RF and  $\Delta essB$  with similar**  
674 **efficacy.** The direct measurement of phage particles released from wild type *E. faeacilis* OG1RF  
675 and the  $\Delta essB$  mutant strain following phage VPE25 infection. Data represent three biological  
676 replicates.

677  
678 **Figure S3. Putative orphan toxins in OG1RF are found as full-length LXG-domain proteins**  
679 **in other bacteria.** OG1RF\_11111, OG1RF\_11113, and OG1RF\_11123 sequences were used  
680 as input for NCBI BLAST. Alignments and homology were rendered in EasyFig.

681  
682 **Figure S4. A distal OG1RF locus encodes an additional LXG-domain protein.** (A) Schematic  
683 showing homology between V583 (NC\_004668.1, top) and OG1RF (NC\_017316.1, bottom).  
684 Sequences were obtained from NCBI, and homology comparisons were rendered in EasyFig. (B)  
685 Cartoon depicting the LXG domain of OG1RF\_12414 (identified using KEGG and ExPASy  
686 PROSITE). (C) Predicted structural homology between OG1RF\_12414 (lilac) and the  
687 *Pseudomonas protogens* Pf-5 Tne2/Tni2 complex (PDB 6B12). Tne2 is shown in green, and Tni2  
688 is shown in gray. Structural modeling was done using PHYRE2, and images were rendered in  
689 Pymol.

690  
691 **Figure S5. Domain architecture of *Enterococcus* LXG proteins.** Domain architectures were  
692 identified using the NCBI Conserved Domain Architectural Retrieval Tool (DART) with  
693 OG1RF\_11109 as an input. Diagrams are drawn to scale.

694  
695 **Figure S6. Antibiotic susceptibility of *E. faecalis* OG1RF.** Growth of wild type *E. faecalis*  
696 OG1RF was monitored over 18 hours in the presence or absence of (A) ampicillin, (B)  
697 vancomycin and (C) daptomycin in microtiter plates. The antibiotic concentrations highlighted with  
698 a blue box were deemed sub-inhibitory and used to investigate T7SS expression levels. Early  
699 log-phase cultures of *E. faecalis* OG1RF were grown in the presence or absence of (D) mitomycin  
700 C (4 µg/ml) or (E) ciprofloxacin (2 µg/ml) to show that even though these routine concentrations  
701 used to promote a stress response in other *E. faecalis*, they do not prevent bacterial growth.

702  
703 **Figure S7. *E. faecalis* mutants of cell wall homeostasis show no growth defects and**  
704 **respond to phage VPE25 infection.** (A) Optical density of wild type *E. faecalis* and isogenic  
705 mutants were monitored for 18 hours. (B) While all the strains were susceptible to phage VPE25  
706 infection, the proportion of released phage particles was diminished in the *croR* and *croS*

707 transposon mutant background. Data represent three biological replicates. \* $P < 0.001$  by unpaired  
708 Student's t-test.

709

710 **Figure S8. Quantitative PCR demonstrates that LiaR/S and CroS/R two-component**  
711 **systems do not influence T7SS gene expression during phage infection. (A- F)** mRNA  
712 transcript levels of T7SS genes are enhanced in the transposon mutants of *liaR*, *liaS*, *croR* and  
713 *croS* strains similar to wild type *E. faecalis* OG1RF during phage infection (MOI = 1) compared to  
714 untreated controls. Data represent three biological replicates. \* $P < 0.01$ , \*\* $P < 0.0001$  by unpaired  
715 Student's t-test.

716

717 **Figure S9. Sub-lethal ceftriaxone exposure does not influence T7SS gene expression in *E.***  
718 ***faecalis* OG1RF.** Transcription of T7SS genes are not elevated 20 minutes post ceftriaxone  
719 (128 $\mu$ g/ml) administration relative to the untreated controls.

720

721 **Table S1. List of bacterial strains, phages, plasmids and primers used in this study.**

722

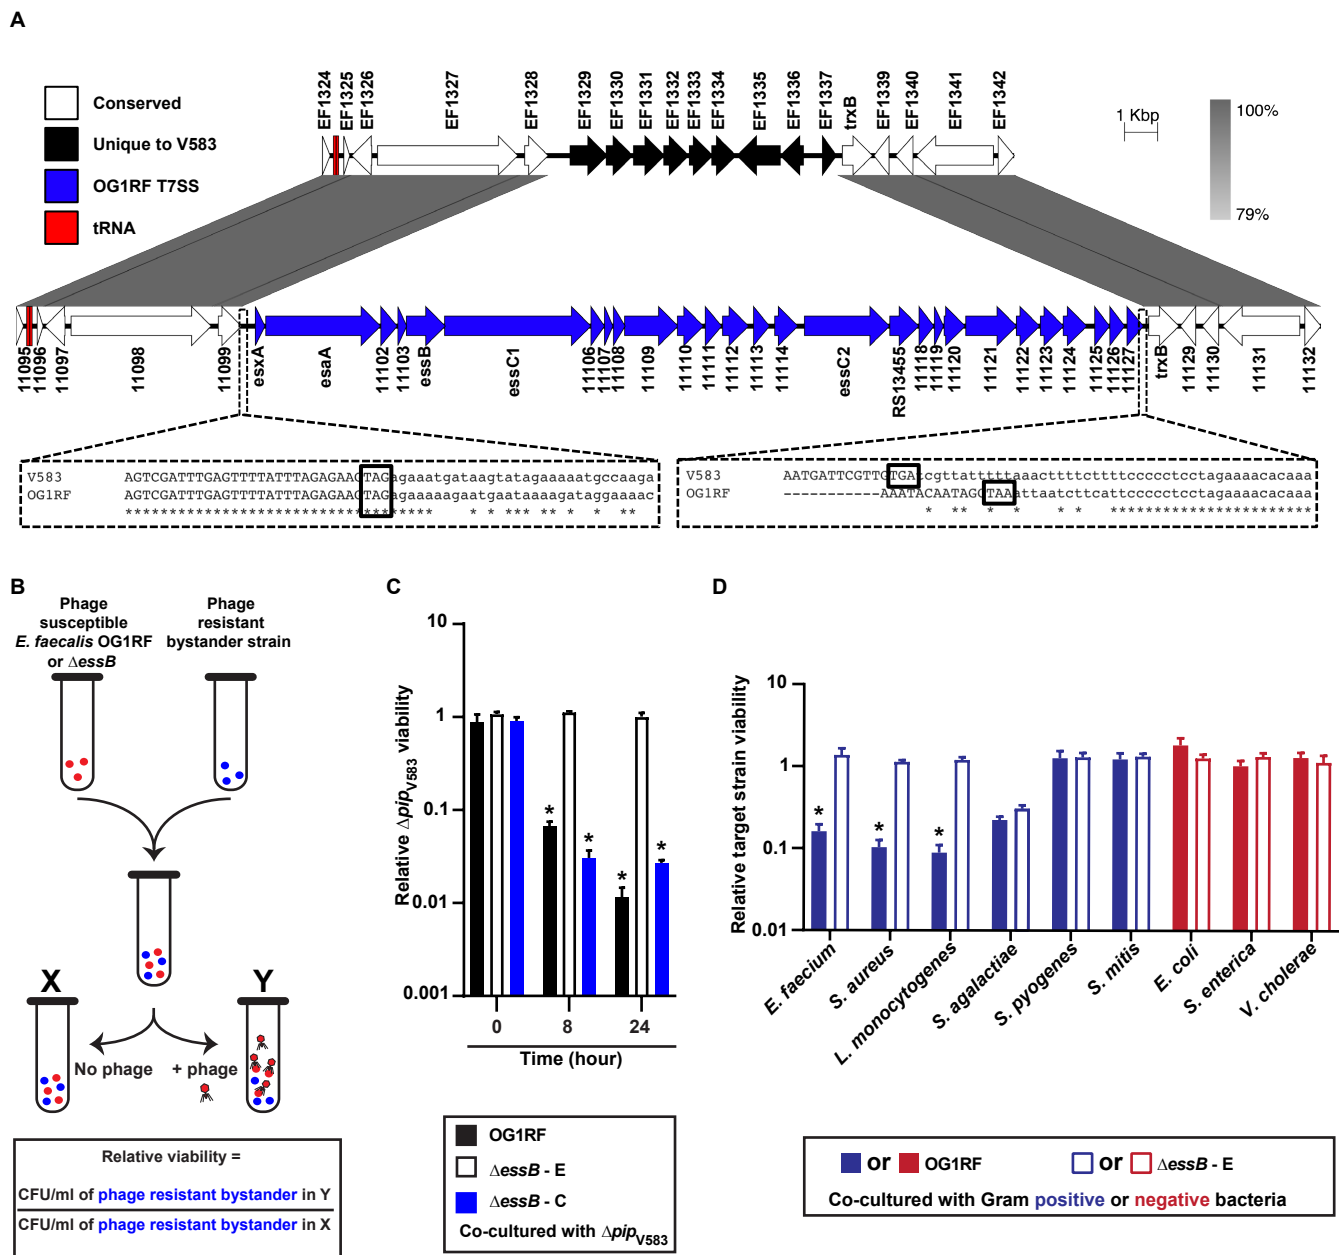

Fig. 1

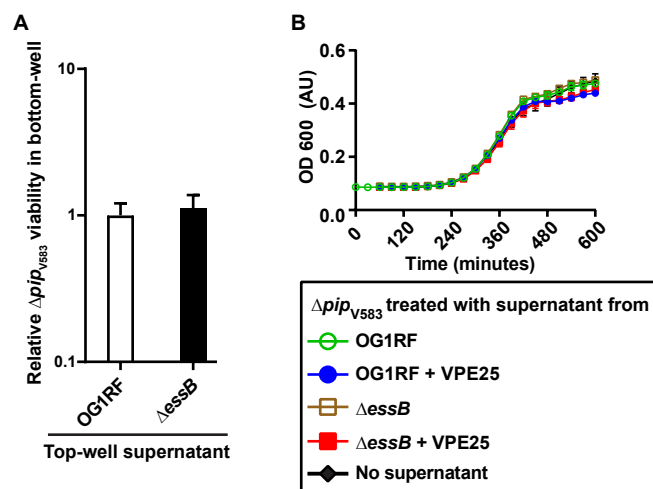

**Fig. 2**



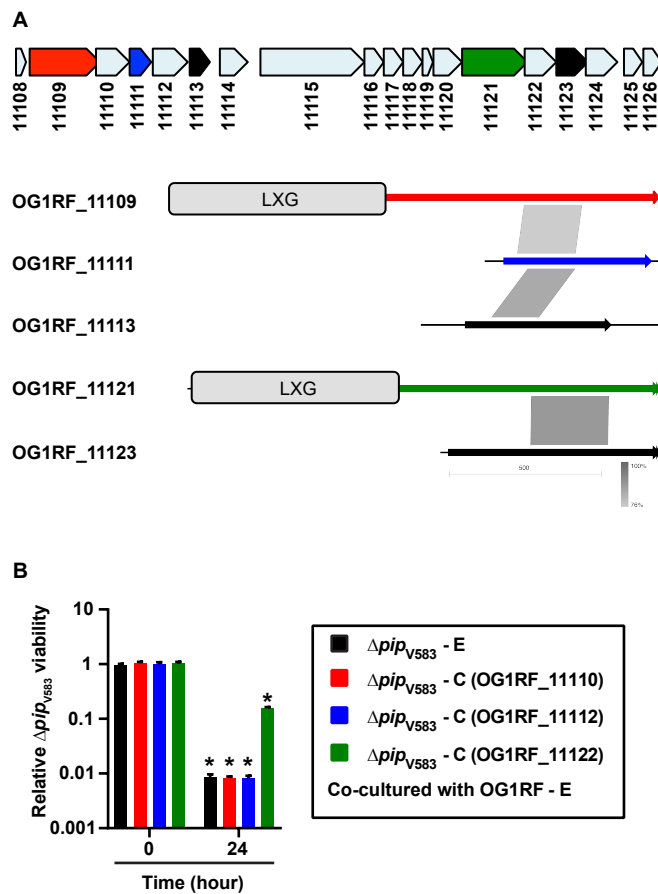

Fig. 3

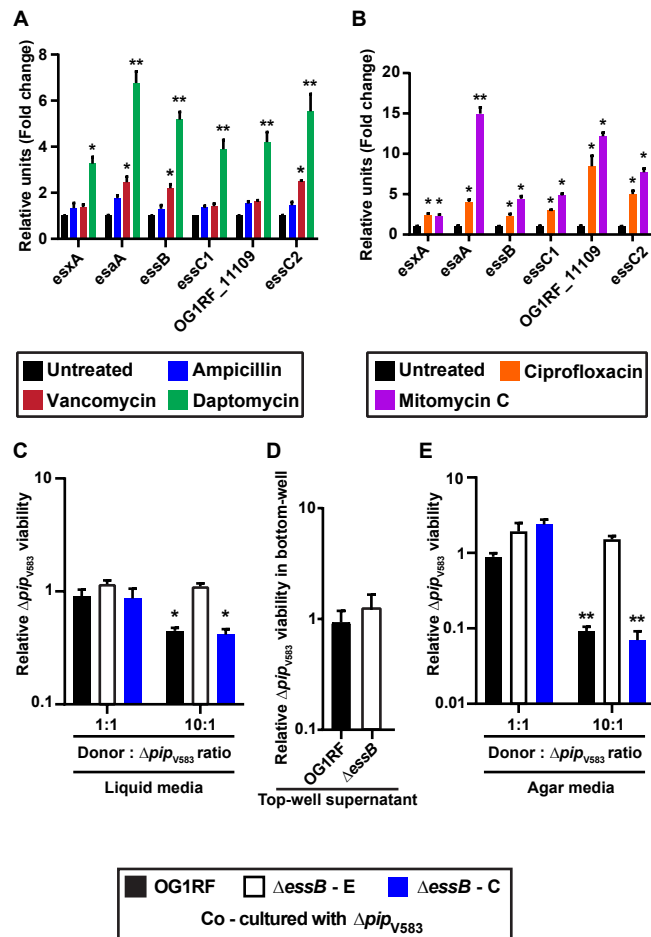

Fig. 4

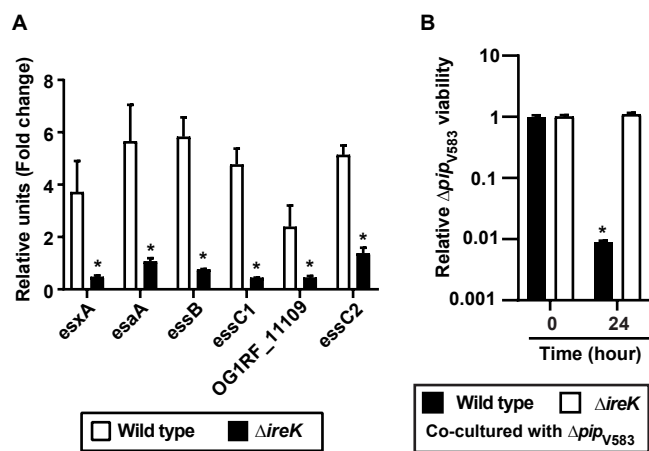

Fig. 5

Tree scale: 0.1

bioRxiv preprint doi: <https://doi.org/10.1101/2020.05.11.077669>; this version posted May 11, 2020. The copyright holder for this preprint (which was not certified by peer review) is the author/funder, who has granted bioRxiv a license to display the preprint in perpetuity. It is made available under aCC-BY-NC-ND 4.0 International license.

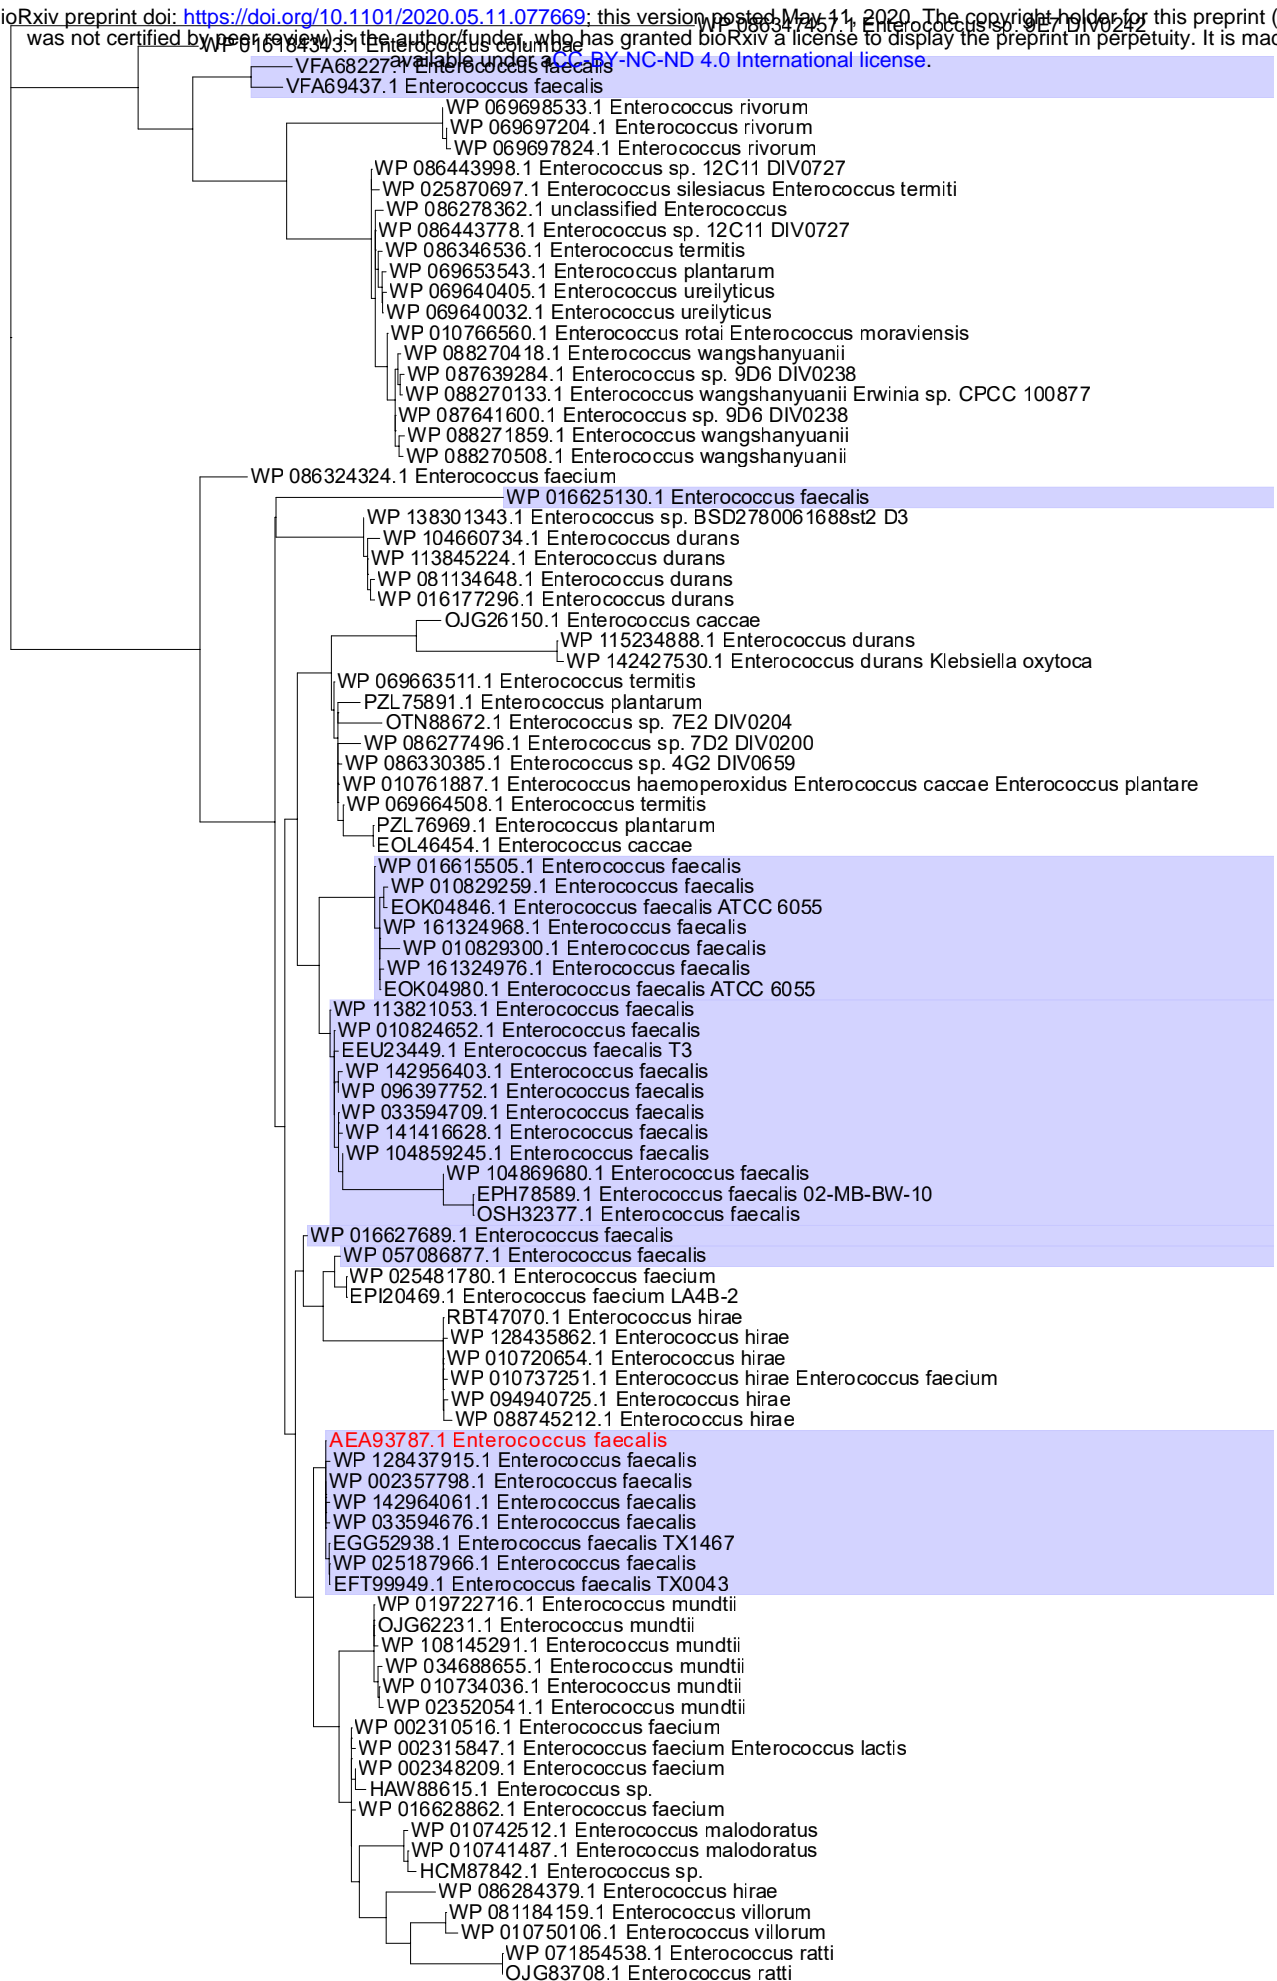

Fig. S1

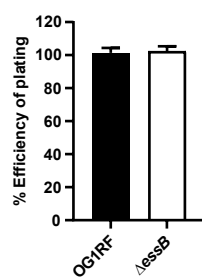

**Fig. S2**

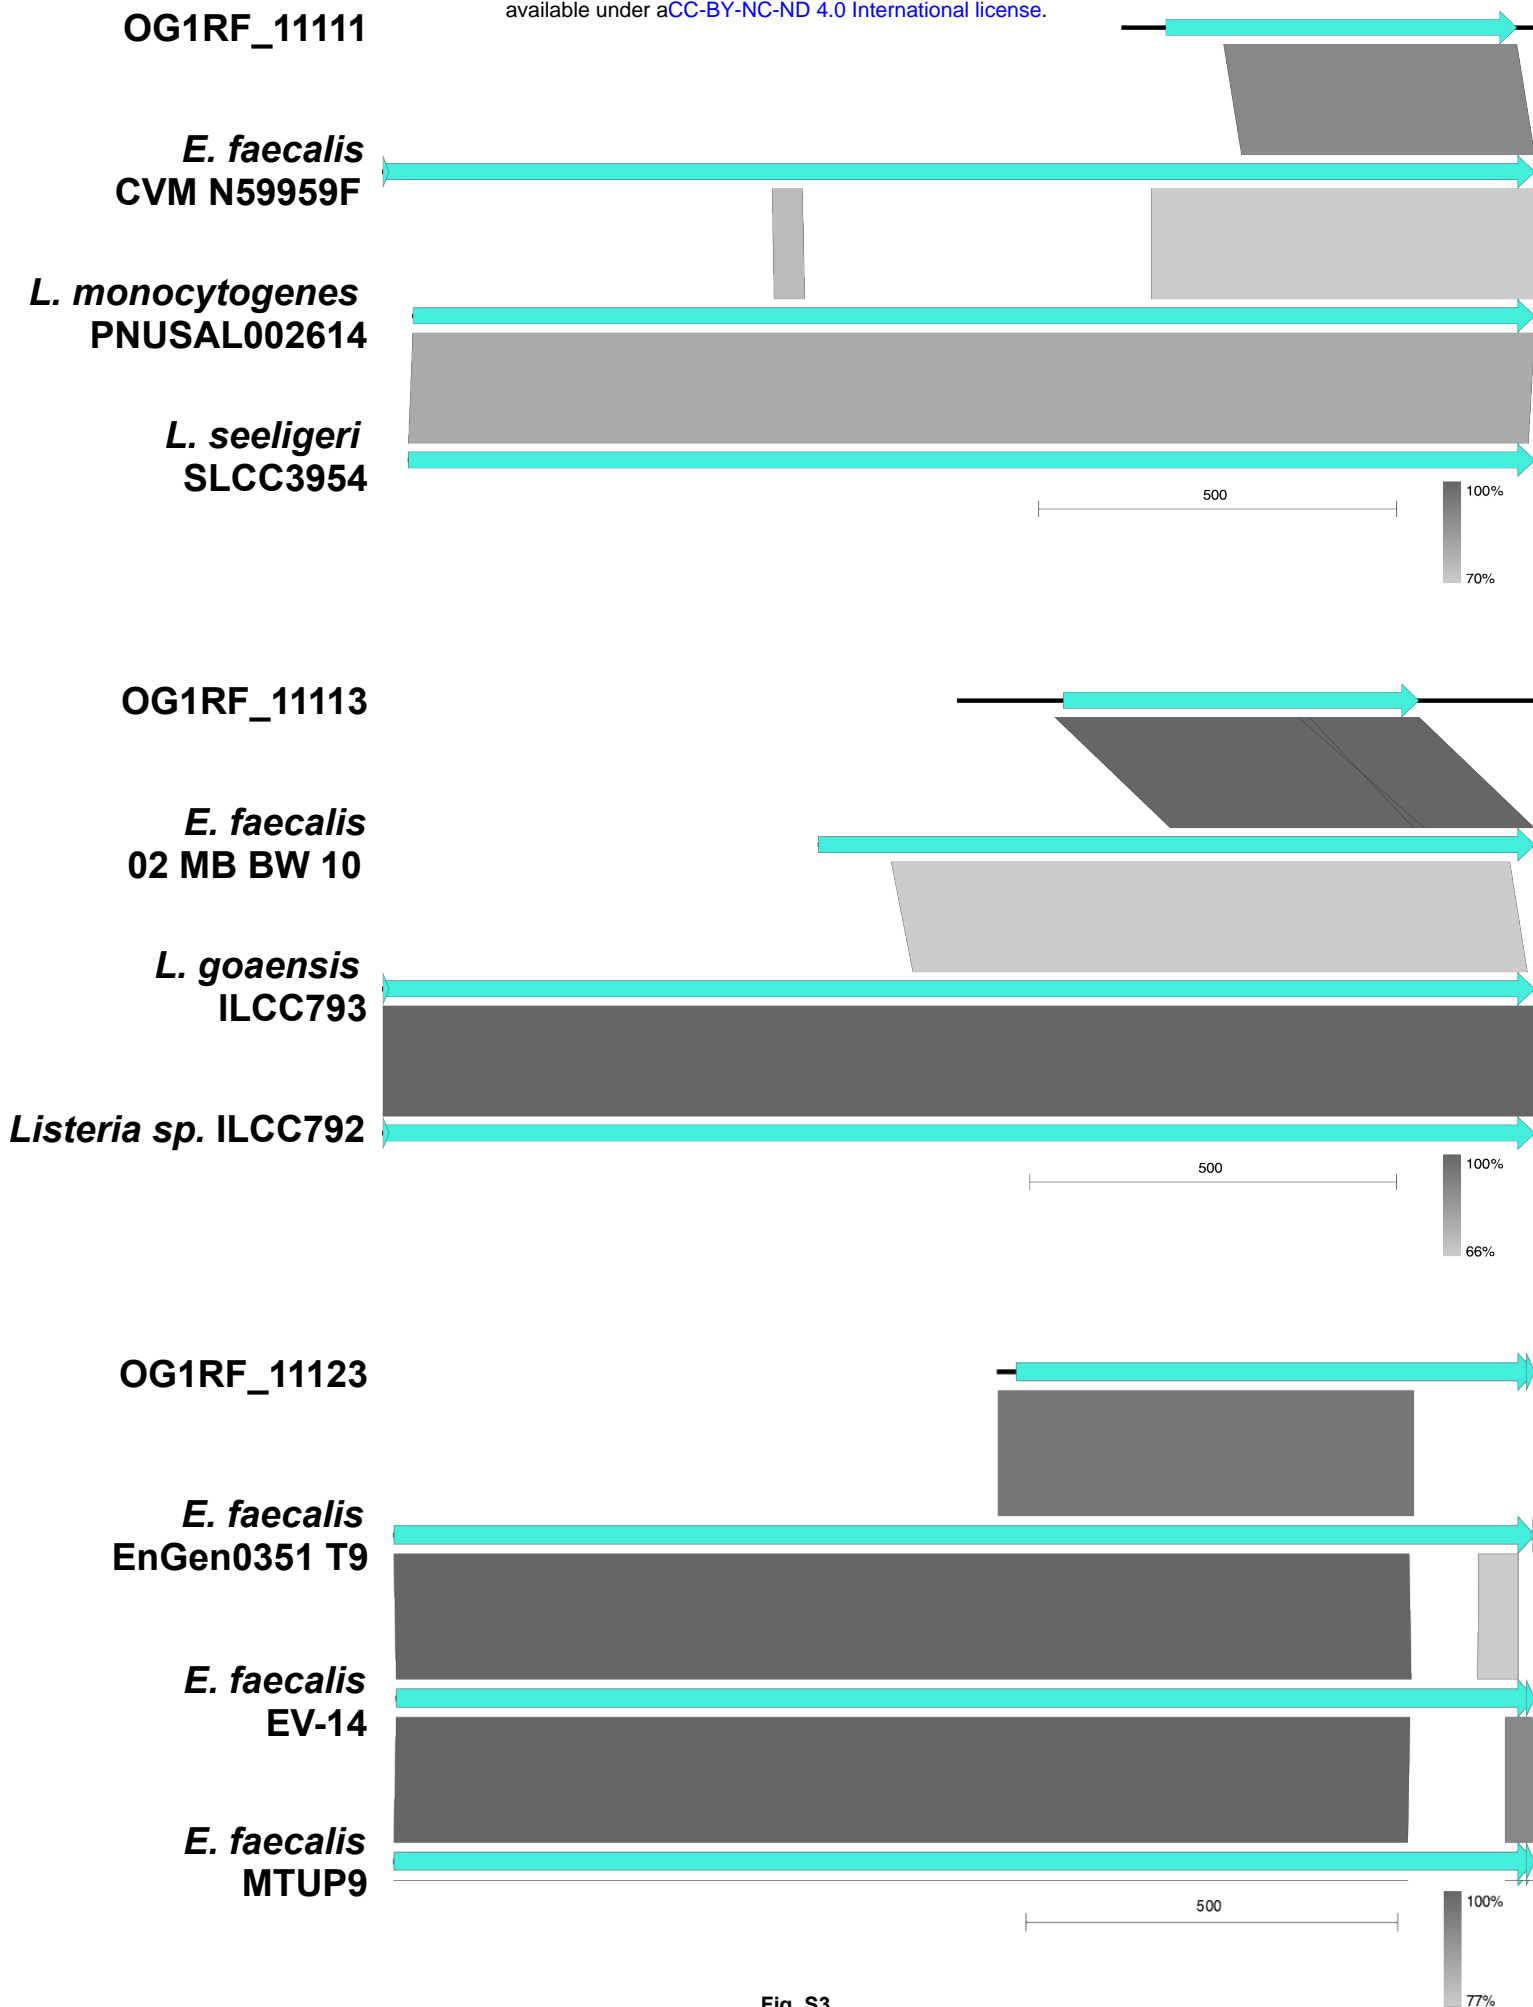

Fig. S3

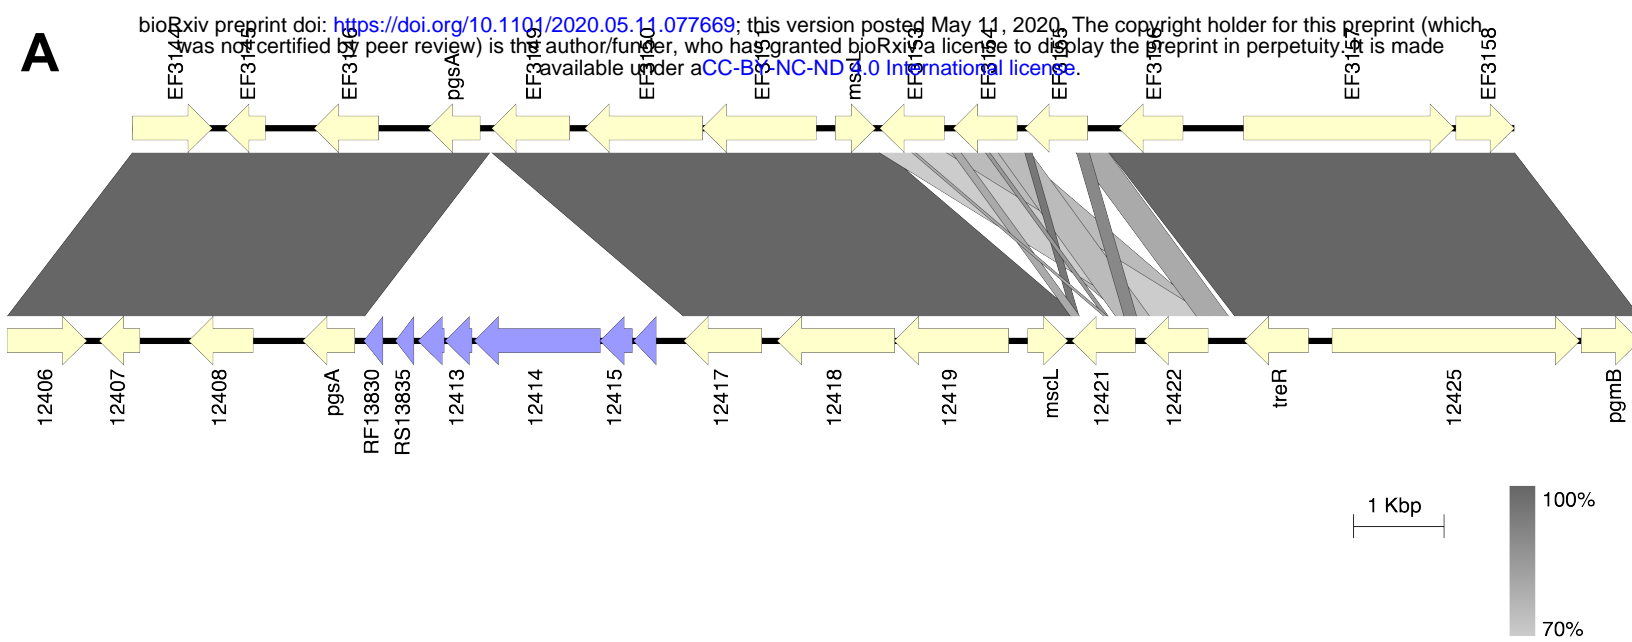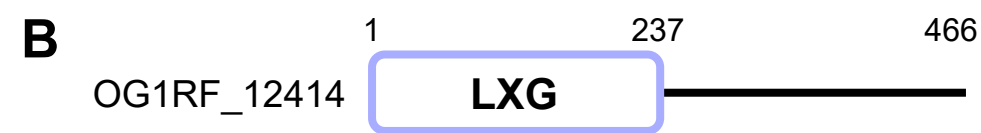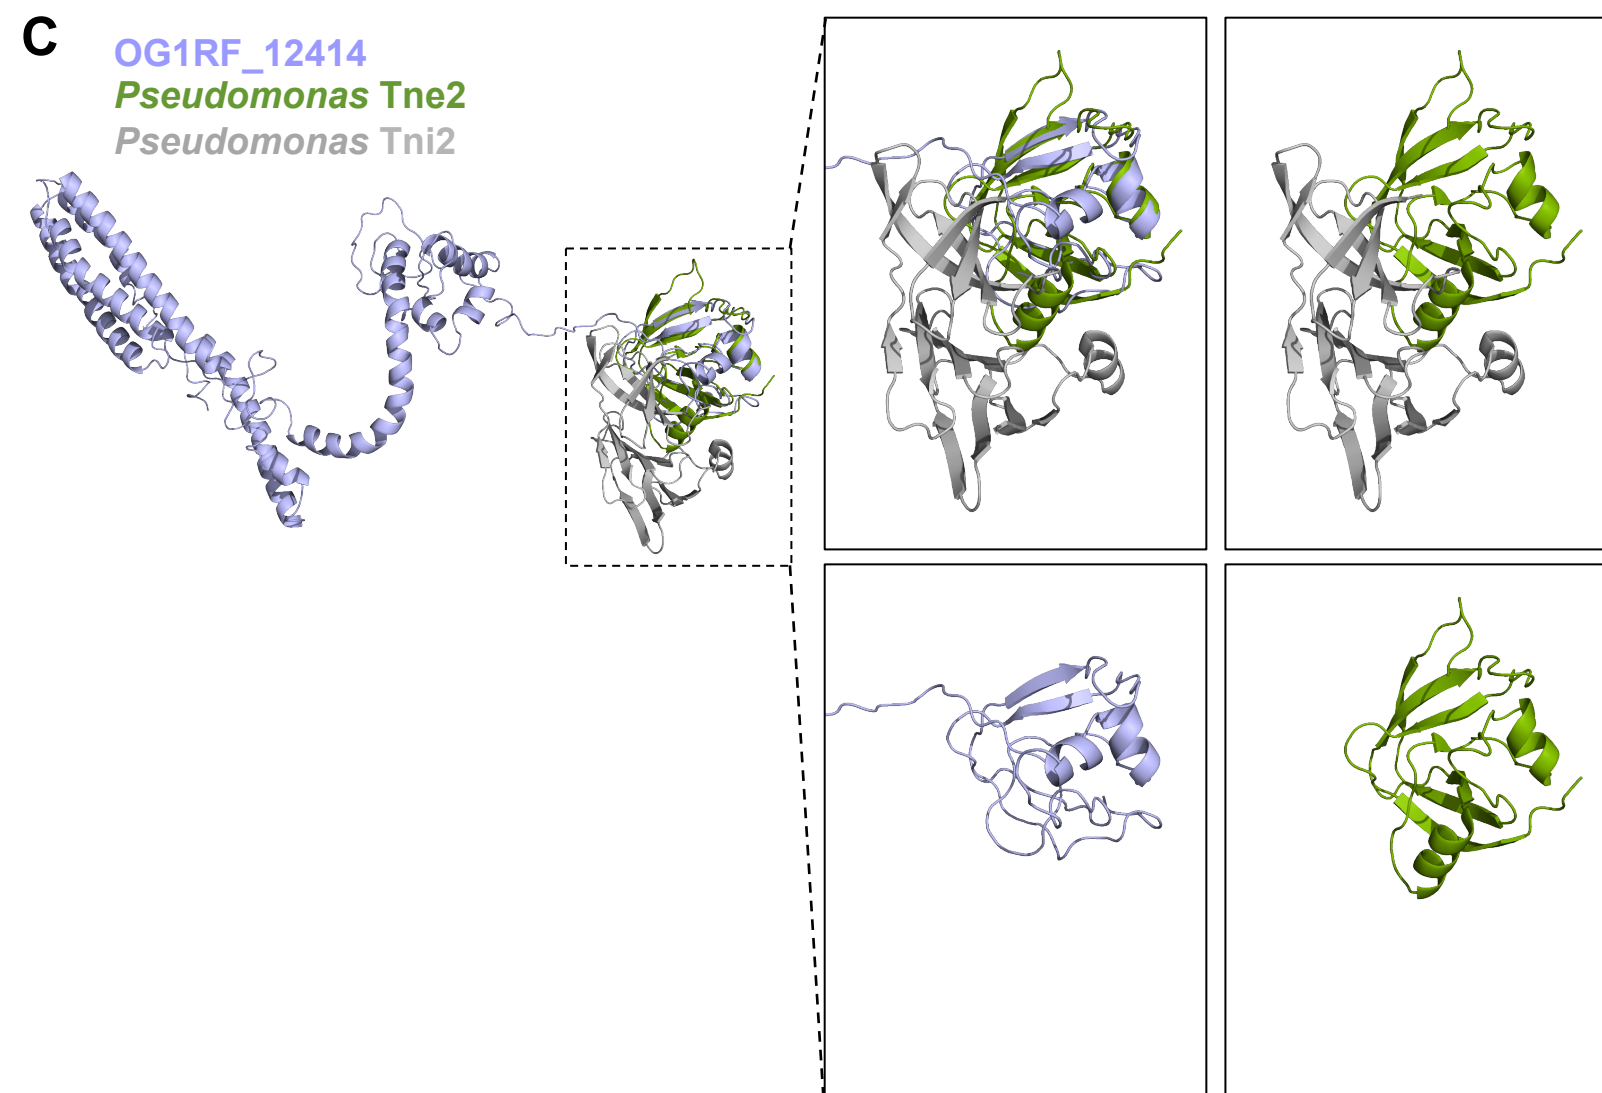

Fig. S4

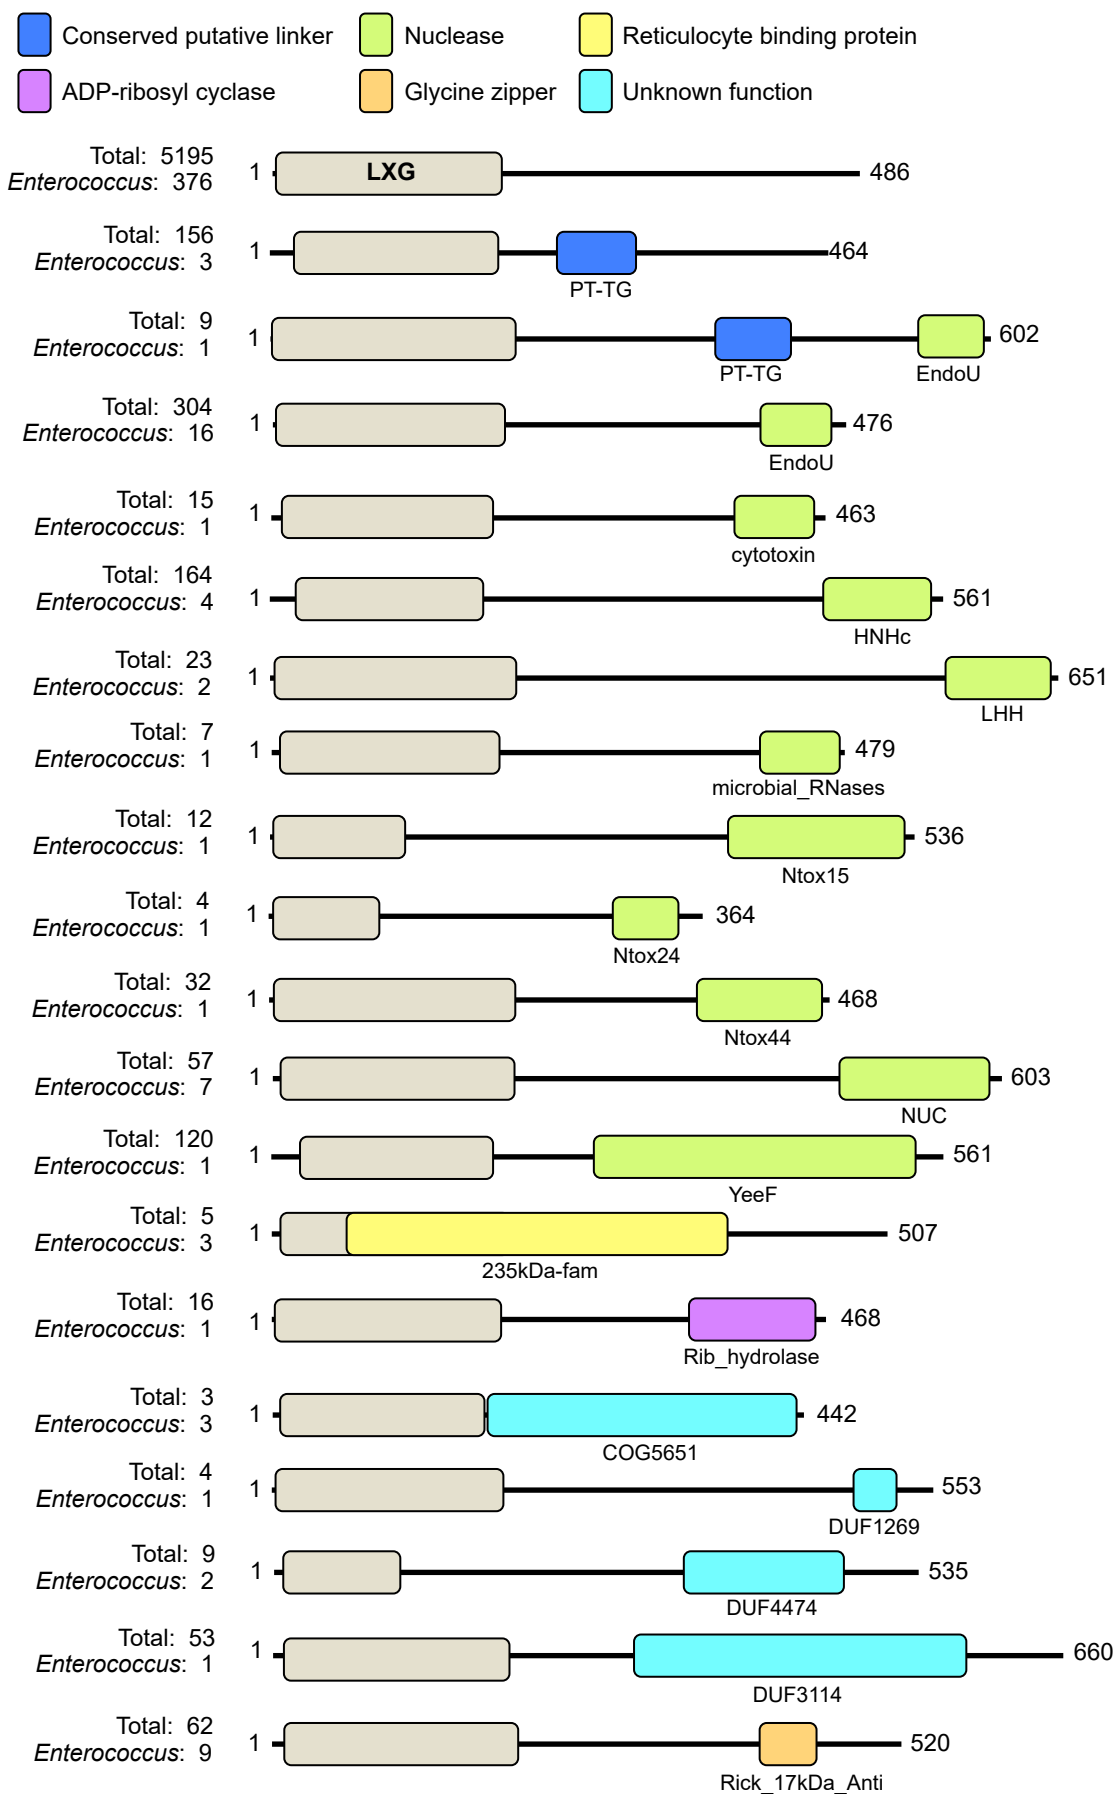

Fig. S5



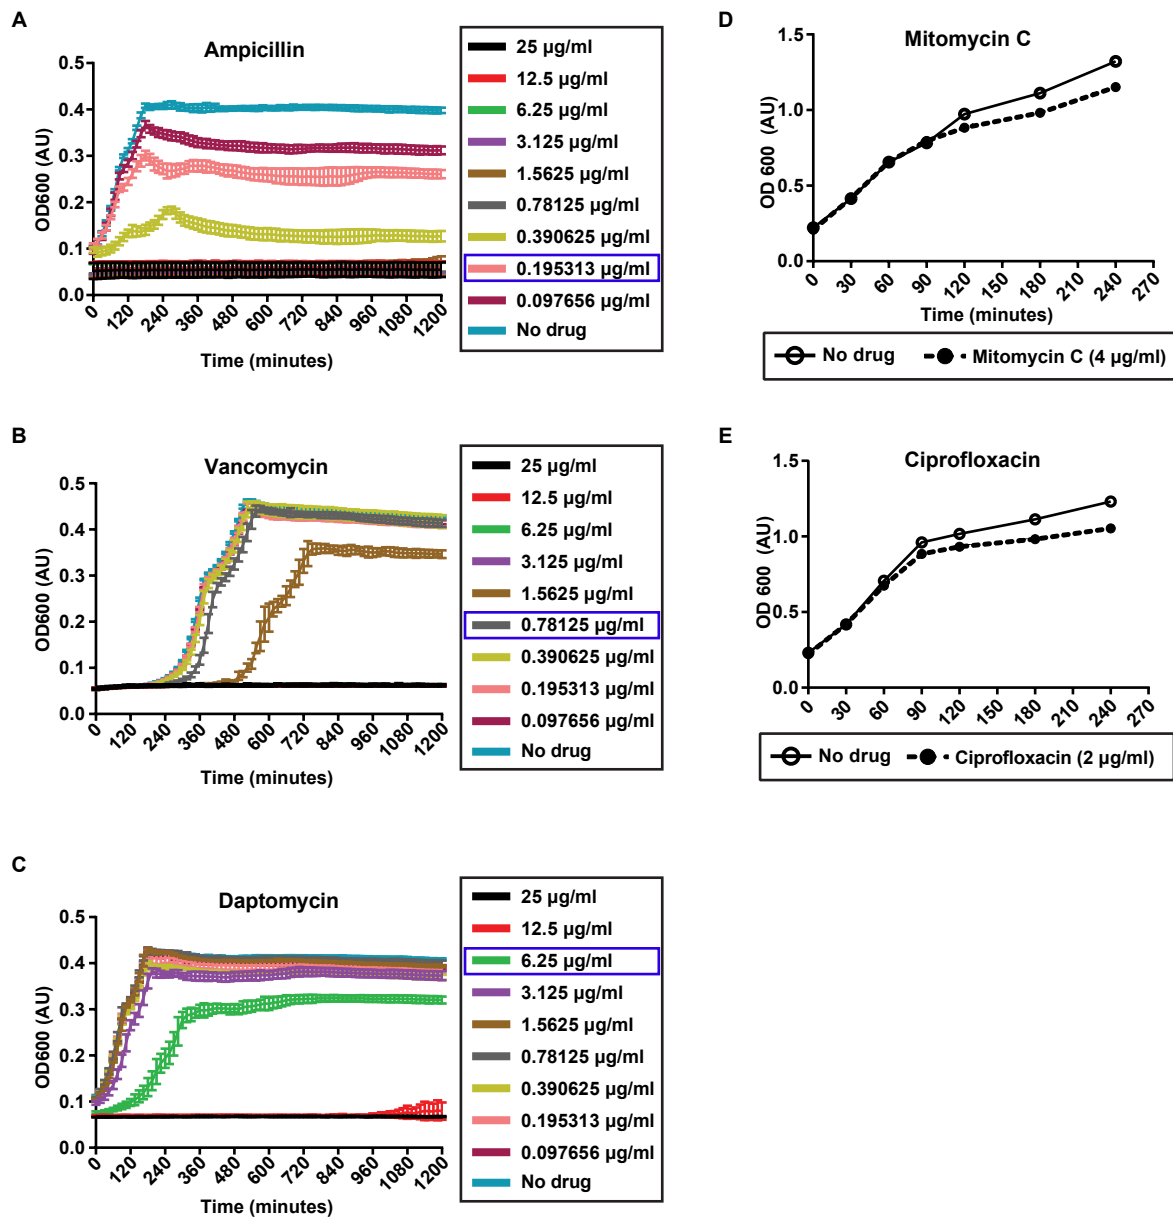

Fig. S6

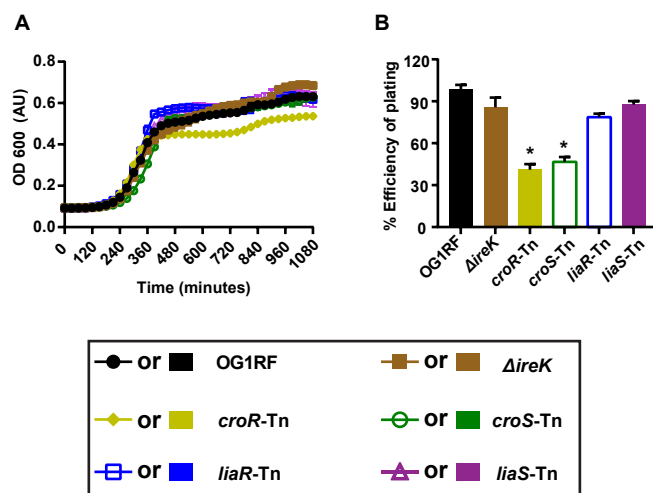

Fig. S7

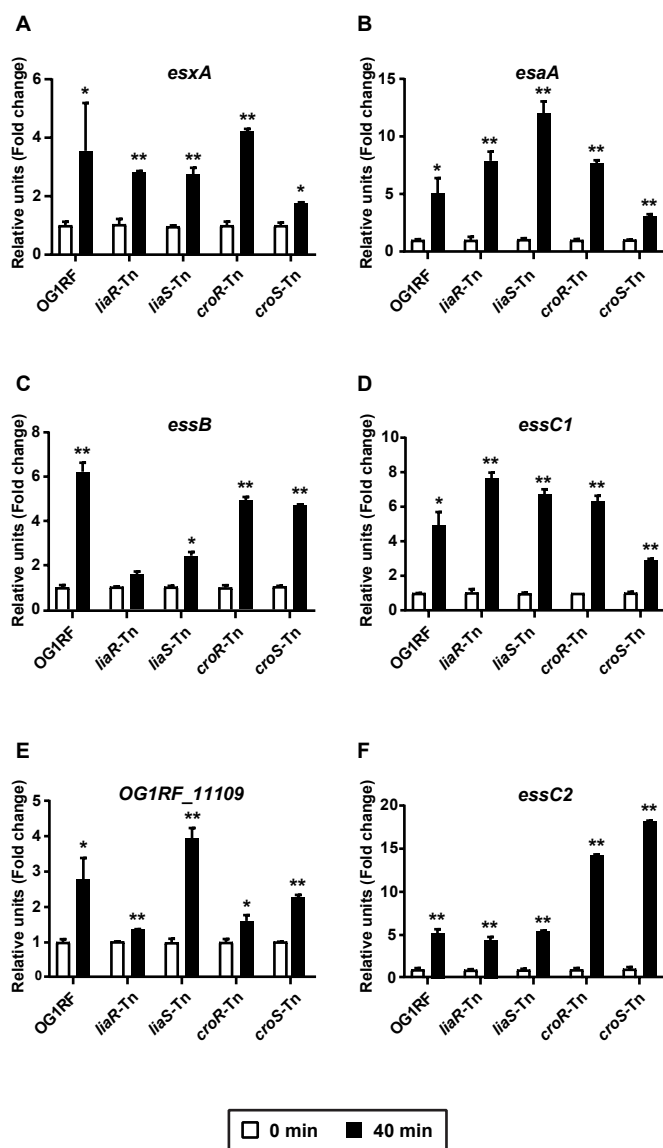

Fig. S8

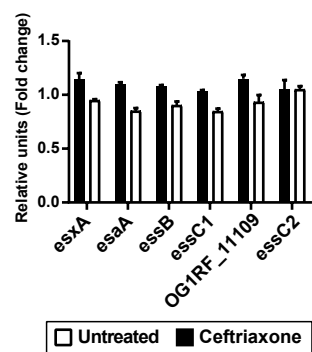

**Fig. S9**

**Table S1. List of bacterial strains, phages, plasmids, and primers used in this study**

| Strains, phages,<br>Plasmids, and<br>primers | Characteristics<br>and/or description                                                                                                                                           | Reference<br>/Source |
|----------------------------------------------|---------------------------------------------------------------------------------------------------------------------------------------------------------------------------------|----------------------|
| <b><i>Enterococcus faecalis</i></b>          |                                                                                                                                                                                 |                      |
| OG1RF                                        | Human oral isolate; Rf <sup>R</sup> , Fa <sup>R</sup>                                                                                                                           | (1)                  |
| $\Delta pip_{V583}$                          | V583 background with a deletion of <i>pip</i> . Vm <sup>R</sup> , Em <sup>R</sup> , Gm <sup>R</sup>                                                                             | (2)                  |
| $\Delta ireK$                                | <i>E. faecalis</i> OG1RF CK119                                                                                                                                                  | (3)                  |
| $\Delta essB$                                | <i>E. faecalis</i> OG1RF markerless deletion in OG1RF_11104                                                                                                                     | This study           |
| <i>croR-Tn</i>                               | <i>E. faecalis</i> OG1RF <i>croR</i> transposon mutant. Rf <sup>R</sup> , Fa <sup>R</sup> , Cm <sup>R</sup>                                                                     | (4)                  |
| <i>croS-Tn</i>                               | <i>E. faecalis</i> OG1RF <i>croS</i> transposon mutant. Rf <sup>R</sup> , Fa <sup>R</sup> , Cm <sup>R</sup>                                                                     | (4)                  |
| <i>liaR-Tn</i>                               | <i>E. faecalis</i> OG1RF <i>liaR</i> transposon mutant. Rf <sup>R</sup> , Fa <sup>R</sup> , Cm <sup>R</sup>                                                                     | (4)                  |
| <i>liaS-Tn</i>                               | <i>E. faecalis</i> OG1RF <i>liaS</i> transposon mutant. Rf <sup>R</sup> , Fa <sup>R</sup> , Cm <sup>R</sup>                                                                     | (4)                  |
| OG1RF -E                                     | <i>E. faecalis</i> OG1RF carrying pLZ12A empty vector. Rf <sup>R</sup> , Fa <sup>R</sup> , Cm <sup>R</sup>                                                                      | This study           |
| $\Delta essB$ - E                            | $\Delta essB$ strain carrying pLZ12A empty vector. Rf <sup>R</sup> , Fa <sup>R</sup> , Cm <sup>R</sup>                                                                          | This study           |
| $\Delta essB$ - C                            | $\Delta essB$ strain carrying pLZ12A complementation vector. Rf <sup>R</sup> , Fa <sup>R</sup> , Cm <sup>R</sup>                                                                | This study           |
| $\Delta pip_{V583}$ - E                      | $\Delta pip_{V583}$ strain carrying pLZ12A empty vector. Vm <sup>R</sup> , Em <sup>R</sup> , Gm <sup>R</sup> , Cm <sup>R</sup>                                                  | (5)                  |
| $\Delta pip_{V583}$ - C<br>(OG1RF_11110)     | $\Delta pip_{V583}$ strain carrying pLZ12A containing coding sequence of OG1RF_11110 from <i>P-bacA</i> . Vm <sup>R</sup> , Em <sup>R</sup> , Gm <sup>R</sup> , Cm <sup>R</sup> | This study           |
| $\Delta pip_{V583}$ - C<br>(OG1RF_11112)     | $\Delta pip_{V583}$ strain carrying pLZ12A containing coding sequence of OG1RF_11112 from <i>P-bacA</i> . Vm <sup>R</sup> , Em <sup>R</sup> , Gm <sup>R</sup> , Cm <sup>R</sup> | This study           |
| $\Delta pip_{V583}$ - C<br>(OG1RF_11122)     | $\Delta pip_{V583}$ strain carrying pLZ12A containing coding sequence of OG1RF_11122 from <i>P-bacA</i> . Vm <sup>R</sup> , Em <sup>R</sup> , Gm <sup>R</sup>                   | This study           |
| <b>Other bacteria</b>                        |                                                                                                                                                                                 |                      |
| <i>S. aureus</i>                             | <i>Staphylococcus aureus</i> strain LAC* $\phi 11::LL29 tet$ . Tc <sup>R</sup>                                                                                                  | (6)                  |
| <i>E. faecium</i>                            | <i>Enterococcus faecium</i> strain 1,231,410. Vm <sup>R</sup> , Em <sup>R</sup>                                                                                                 | (7)                  |
| <i>L. monocytogenes</i>                      | <i>Listeria monocytogenes</i> 10403S. St <sup>R</sup>                                                                                                                           | (8)                  |
| <i>S. agalactiae</i>                         | <i>Streptococcus agalactiae</i> strain COH1.                                                                                                                                    | (9)                  |
| <i>S. pyogenes</i>                           | <i>Streptococcus pyogenes</i> ATCC 12384.                                                                                                                                       | ATCC                 |

|                                |                                                                                                                 |            |
|--------------------------------|-----------------------------------------------------------------------------------------------------------------|------------|
| <i>S. mitis</i>                | <i>Streptococcus mitis</i> NS5. Clinical isolate from UT Southwestern Clinical Microbiology Laboratory          |            |
| <i>S. enterica</i>             | <i>Salmonella enterica</i> serovar Typhimurium. AV09379<br><i>put</i> ::Kan; Kn <sup>R</sup>                    | (10)       |
| <i>V. cholerae</i>             | <i>Vibrio cholerae</i> C6706 <i>int I4</i> :: <i>TnFL63</i> ; Kn <sup>R</sup>                                   | (11)       |
| <b><i>Escherichia coli</i></b> |                                                                                                                 |            |
| TG1                            | [ <i>F'</i> <i>traD36 proAB lacIqZ ΔM15</i> ] <i>supE thi-1 Δ(lac-proAB)</i><br><i>Δ(mcrBhsdSM)5(rK - mK -)</i> | Lucigen    |
| K12                            | <i>Escherichia coli</i> K12, ATCC 25404                                                                         | ATCC       |
| <b>Phage</b>                   |                                                                                                                 |            |
| VPE25                          | Siphoviridae; Wastewater isolate                                                                                | (2)        |
| <b>Plasmids</b>                |                                                                                                                 |            |
| pLZ12A                         | <i>bacA</i> promoter cloned into shuttle vector pLZ12; pSH71 origin; Cm <sup>R</sup>                            | (5, 12)    |
| pLT06                          | <i>E. faecalis</i> allelic exchange vector; Cm <sup>R</sup>                                                     | (13)       |
| pBD01                          | <i>ΔessB</i> construct cloned into pLT06 by Gibson assembly. Cm <sup>R</sup>                                    | This study |
| pLZ12A: <i>essB</i>            | <i>essB</i> complementation vector. Cloned into PstI/BamHI site. Cm <sup>R</sup>                                | This study |
| pLZ12A:<br><i>OG1RF_11110</i>  | pLZ12A expressing OG1RF_11110 from <i>P<sub>bacA</sub></i> . Cloned into PstI/BamHI site. Cm <sup>R</sup>       | This study |
| pLZ12A:<br><i>OG1RF_11112</i>  | pLZ12A expressing OG1RF_11112 from <i>P<sub>bacA</sub></i> . Cloned into PstI/BamHI site. Cm <sup>R</sup>       | This study |
| pLZ12A:<br><i>OG1RF_11122</i>  | pLZ12A expressing OG1RF_11122 from <i>P<sub>bacA</sub></i> . Cloned into PstI/BamHI site. Cm <sup>R</sup>       | This study |
| <b>Primers</b>                 |                                                                                                                 |            |
| <i>essB</i> -F                 | NNNNNNCTGCAGATGAGCGATTAAAGGATATTTCA;<br>Forward primer to generate pLZ12A: <i>essB</i> ; PstI site              | This study |
| <i>essB</i> -R                 | NNNNNNGGATCCTTACTATTTTCGTTGTCATCC;<br>Reverse primer to generate pLZ12A: <i>essB</i> ; BamHI site               | This study |
| <i>OG1RF_11110</i> -F          | NNNNNNCTGCAGATGGACTTCCAAGGTGGTAAAATTAT<br>; Forward primer to generate pLZ12A: <i>OG1RF_11110</i> ; PstI site   | This study |

|                     |                                                                                                                   |            |
|---------------------|-------------------------------------------------------------------------------------------------------------------|------------|
| OG1RF_11110-R       | NNNNNNGGATCCTTATTCTCCGTACCATTCTCTTTA;<br>Reverse primer to generate pLZ12A: <i>OF1RF_11110</i> ; BamHI site       | This study |
| OG1RF_11112-F       | NNNNNNCTGCAGATGAATAAAATCTTAAATAAAATATCTTTTG;<br>Forward primer to generate pLZ12A: <i>OF1RF_11112</i> ; PstI site | This study |
| OG1RF_11112-R       | NNNNNNGGATCCCTAACTATCTTCACCATACCATTCTTG;<br>Reverse primer to generate pLZ12A: <i>OF1RF_11112</i> ; BamHI site    | This study |
| OG1RF_11122-F       | NNNNNNCTGCAGATGGTTTTTCATGATAAAAAATTATGTACC;<br>Forward primer to generate pLZ12A: <i>OF1RF_11122</i> ; PstI site  | This study |
| OG1RF_11122-R       | NNNNNNGGATCCTTATTTTTTGGTTCTCTTGTTCTTC;<br>Reverse primer to generate pLZ12A: <i>OF1RF_11122</i> ; BamHI site      | This study |
| RT- <i>esxA</i> -F  | AAGGGCAAGCATTTC AAGCG; qPCR forward primer for <i>OG1RF_11100</i>                                                 | (14)       |
| RT- <i>esxA</i> -R  | TCTTGACGGT CACGTTCTGC; qPCR reverse primer for <i>OG1RF_11100</i>                                                 | (14)       |
| RT- <i>esaA</i> -F  | CCAATGGCTTGGCAACTGAC; qPCR forward primer for <i>OG1RF_11101</i>                                                  | (14)       |
| RT- <i>esaA</i> -R  | GCGAACGAACGTGCATTTTG; qPCR reverse primer for <i>OG1RF_11101</i>                                                  | (14)       |
| RT- <i>essB</i> -F  | GGGAATGGCACCCTGAAAGA; qPCR forward primer for <i>OG1RF_11104</i>                                                  | (14)       |
| RT- <i>essB</i> -R  | CTTCGCGCTTGGCTTTTTGA; qPCR reverse primer for <i>OG1RF_11104</i>                                                  | (14)       |
| RT- <i>essC1</i> -F | TTGGAAAGGTGGCGGAATAG; qPCR forward primer for <i>OG1RF_11105</i>                                                  | (14)       |
| RT- <i>essC1</i> -R | TCTGCTTTGATACTGGCTAAGG; qPCR reverse primer for <i>OG1RF_11105</i>                                                | (14)       |
| RT-11109-F          | GCTTTGGAGAACGCTGAACG; qPCR forward primer for <i>OG1RF_11109</i>                                                  | (14)       |

|            |                                                              |      |
|------------|--------------------------------------------------------------|------|
| RT-11109-R | TTTTGACAGTCTTGCGCTCG; qPCR reverse primer for OG1RF_11109    | (14) |
| RT-essC2-F | CTCAACCGGATCGTGCTTATT; qPCR forward primer for OG1RF_11115   | (14) |
| RT-essC2-R | CCTTGGTAGCGAATGGATCATAG; qPCR reverse primer for OG1RF_11115 | (14) |
| RT-16S-F   | CGCTTCTTTCCTCCCGAGT; qPCR forward primer 16S rRNA gene       | (14) |
| RT-16S-F   | GCCATGCGGCATAAACTG; qPCR reverse primer 16S rRNA gene        | (14) |

---

Cm<sup>R</sup> - chloramphenicol resistant; Rf<sup>R</sup> - rifampicin resistance; Fa<sup>R</sup> - fusidic acid resistance; Vm<sup>R</sup> - vancomycin resistance; Em<sup>R</sup> - erythromycin resistance; Gm<sup>R</sup> - Gentamicin resistance; Tc<sup>R</sup> - tetracycline resistance; St<sup>R</sup> = streptomycin resistance; Kn<sup>R</sup> = Kanamycin resistance. Restriction enzyme sites are underlined.

1. A. Bourgogne *et al.*, Large scale variation in *Enterococcus faecalis* illustrated by the genome analysis of strain OG1RF. *Genome Biol* **9**, R110 (2008).
2. B. A. Duerkop, W. Huo, P. Bhardwaj, K. L. Palmer, L. V. Hooper, Molecular basis for lytic bacteriophage resistance in enterococci. *MBio* **7** (2016).
3. C. J. Kristich, C. L. Wells, G. M. Dunny, A eukaryotic-type Ser/Thr kinase in *Enterococcus faecalis* mediates antimicrobial resistance and intestinal persistence. *Proc Natl Acad Sci U S A* **104**, 3508-3513 (2007).
4. J. L. Dale *et al.*, Comprehensive functional analysis of the *Enterococcus faecalis* core genome using an ordered, sequence-defined collection of insertional mutations in strain OG1RF. *mSystems* **3** (2018).
5. A. Chatterjee *et al.*, Bacteriophage resistance alters antibiotic-mediated intestinal expansion of enterococci. *Infect Immun* **87**, e00085-00019 (2019).
6. J. M. Kwiecinski *et al.*, *Staphylococcus aureus* adhesion in endovascular infections is controlled by the ArIRS-MgrA signaling cascade. *PLoS Pathog* **15**, e1007800 (2019).



7. K. L. Palmer *et al.*, High-quality draft genome sequences of 28 *Enterococcus* sp. isolates. *J Bacteriol* **192**, 2469-2470 (2010).
8. M. Rayamajhi, J. Humann, K. Penheiter, K. Andreasen, L. L. Lenz, Induction of IFN- $\alpha$  enables *Listeria monocytogenes* to suppress macrophage activation by IFN- $\gamma$ . *J Exp Med* **207**, 327-337 (2010).
9. J. M. Kuypers, L. M. Heggen, C. E. Rubens, Molecular analysis of a region of the group B streptococcus chromosome involved in type III capsule expression. *Infect Immun* **57**, 3058-3065 (1989).
10. L. F. Fitzsimmons *et al.*, SpoT induces intracellular *Salmonella* virulence programs in the phagosome. *mBio* **11** (2020).
11. D. E. Cameron, J. M. Urbach, J. J. Mekalanos, A defined transposon mutant library and its use in identifying motility genes in *Vibrio cholerae*. *Proc Natl Acad Sci U S A* **105**, 8736-8741 (2008).
12. J. Perez-Casal, M. G. Caparon, J. R. Scott, Mry, a trans-acting positive regulator of the M protein gene of *Streptococcus pyogenes* with similarity to the receptor proteins of two-component regulatory systems. *J Bacteriol* **173**, 2617-2624 (1991).
13. L. R. Thurlow, V. C. Thomas, L. E. Hancock, Capsular polysaccharide production in *Enterococcus faecalis* and contribution of CpsF to capsule serospecificity. *J Bacteriol* **191**, 6203-6210 (2009).
14. A. Chatterjee *et al.*, Parallel genomics uncover novel enterococcal-bacteriophage interactions. *mBio* **11** (2020).
