1 **Phage infection and sub-lethal antibiotic exposure mediate *Enterococcus faecalis* type**

2 **VII secretion system dependent inhibition of bystander bacteria**

3

4 Anushila Chatterjee<sup>a\*</sup>, Julia L. E. Willett<sup>b\*</sup>, Gary M. Dunny<sup>b</sup>, Breck A. Duerkop<sup>a,#</sup>

5

6 <sup>a</sup>Department of Immunology and Microbiology, University of Colorado School of Medicine,

7 Aurora, CO, USA, 80045. <sup>b</sup>Department of Microbiology and Immunology, University of

8 Minnesota Medical School, Minneapolis, MN, USA, 55455.

9

10 #Correspondence: Breck A. Duerkop [breck.duerkop@cuanschutz.edu](mailto:breck.duerkop@cuanschutz.edu)

11 \*A.C. and J.L.E.W. contributed equally to this work.

12

13

14 Running title: Phage and antibiotic induced T7SS promotes antibacterial antagonism

15

16 Key words: bacteriophages, *Enterococcus*, antibiotic resistance, phage–bacteria interactions,

17 bacterial secretion systems, type VII secretion, contact-dependent antagonism

18

19

20

21

22

23

24

25

26

27 **Abstract**

28 Bacteriophages (phages) are being considered as alternative therapeutics for the treatment  
29 of multidrug resistant bacterial infections. Considering phages have narrow host-ranges, it is  
30 generally accepted that therapeutic phages will have a marginal impact on non-target bacteria.  
31 We have discovered that lytic phage infection induces transcription of type VIIb secretion  
32 system (T7SS) genes in the pathobiont *Enterococcus faecalis*. Membrane damage during  
33 phage infection induces T7SS gene expression resulting in cell contact dependent antagonism  
34 of different Gram positive bystander bacteria. Deletion of *essB*, a T7SS structural component,  
35 abrogates phage-mediated killing of bystanders. A predicted immunity gene confers protection  
36 against T7SS mediated inhibition, and disruption of its upstream LXG toxin gene rescues growth  
37 of *E. faecalis* and *Staphylococcus aureus* bystanders. Phage induction of T7SS gene  
38 expression and bystander inhibition requires IreK, a serine/threonine kinase, and  
39 OG1RF\_11099, a predicted GntR-family transcription factor. Additionally, sub-lethal doses of  
40 membrane targeting and DNA damaging antibiotics activated T7SS expression independent of  
41 phage infection, triggering T7SS antibacterial activity against bystander bacteria. Our findings  
42 highlight how phage infection and antibiotic exposure of a target bacterium can affect non-target  
43 bystander bacteria and implies that therapies beyond antibiotics, such as phage therapy, could  
44 impose collateral damage to polymicrobial communities.

45

46

47

48

49

50

51

52

## 53 Introduction

54 Enterococci constitute a minor component of the healthy human microbiota [1]. Enterococci,  
55 including *Enterococcus faecalis*, are also nosocomial pathogens that cause a variety of  
56 diseases, including sepsis, endocarditis, surgical-site, urinary tract and mixed bacterial  
57 infections [2, 3]. Over recent decades, enterococci have acquired extensive antibiotic resistance  
58 traits, including resistance to “last-resort” antibiotics such as vancomycin, daptomycin, and  
59 linezolid [4-8]. Following antibiotic therapy, multi-drug resistant (MDR) enterococci can outgrow  
60 to become a dominant member of the intestinal microbiota, resulting in intestinal barrier invasion  
61 and blood stream infection [7, 9]. The ongoing evolution of MDR enterococci in healthcare  
62 settings [4-6, 10, 11] and their ability to transmit antibiotic resistance among diverse bacteria [9,  
63 12-15], emphasize the immediate need for novel therapeutic approaches to control enterococcal  
64 infections.

65 Viruses that infect and kill bacteria (bacteriophages or phages) are receiving attention for  
66 their use as antibacterial agents [16]. Recent studies have demonstrated the efficacy of anti-  
67 enterococcal phages in murine models of bacteremia [17-19] and the administration of phages  
68 to reduce *E. faecalis* burden in the intestine gives rise to phage resistant isolates that are  
69 sensitized to antibiotics [20]. Considering phages are highly specific for their target bacterium,  
70 coupled with the self-limiting nature of their host-dependent replication, this suggests that unlike  
71 antibiotics which have broad off-target antimicrobial activity, phages should have nominal  
72 impact on bacteria outside of their intended target strain [21-23]. However, our understanding of  
73 how phages interact with bacteria and the bacterial response to phage infection is limited.

74 While studying the transcriptional response of phage infected *E. faecalis* cells, we  
75 discovered that phage infection induces the expression of genes involved in the biosynthesis of  
76 a type VIIIb secretion system (T7SS) [24]. Firmicutes, including the enterococci, harbor diverse  
77 T7SS genes encoding transmembrane and cytoplasmic proteins involved in the secretion of  
78 protein substrates [25], and T7SSs promote antagonism of non-kin bacterial cells through

79 contact-dependent secretion of antibacterial effectors and/or toxins [26, 27]. The antibacterial  
80 activity of T7SSs from staphylococci and streptococci are well characterized [25] but T7SS-  
81 mediated antibacterial antagonism has not been described for enterococci. The environmental  
82 cues and regulatory pathways that govern T7SS expression and activity are poorly understood,  
83 although recent studies indicate that exposure to serum and membrane stresses triggered by  
84 pulmonary surfactants, fatty acids and phage infection stimulate T7SS gene expression [24, 28-  
85 31]. This motivated us to determine if phage induced T7SS gene expression in *E. faecalis*  
86 results in the inhibition of non-kin bacterial cells that are not phage targets (bystanders). We  
87 discovered that phage infected *E. faecalis* produces potent T7SS antibacterial activity against  
88 bystander bacteria. Expression of a T7SS antitoxin (immunity factor) gene in bystander cells  
89 and mutation of the LXG domain containing gene located immediately upstream of this immunity  
90 factor confer protection against phage mediated T7SS inhibition. We also investigated the  
91 potential impact of antimicrobials directed against bacterial physiological processes that are also  
92 targeted by phages, including cell wall, cell membrane and DNA damaging agents, on  
93 enterococcal T7SS. Sub-lethal challenge with specific antibiotics enhances T7SS gene  
94 expression resulting in T7SS dependent interspecies antagonism. Additionally, we discovered  
95 that membrane stress during phage infection induces transcription of T7SS genes via a non-  
96 canonical IreK signaling pathway. To our knowledge, the enterococcal T7SS is the first example  
97 of secretion system induction during phage infection. These data shed light on how phage  
98 infection of a cognate bacterial host can influence polymicrobial interactions and raises the  
99 possibility that phages may impose unintended compositional shifts among bystander bacteria  
100 in the microbiota during phage therapy.

101

## 102 **Results**

### 103 **Phage mediated induction of *E. faecalis* T7SS leads to interspecies antagonism.**

104 A hallmark feature of phage therapy is that phages often have a narrow host range, hence  
105 they do not influence the growth of non-susceptible bacteria occupying the same niche [22]. We  
106 discovered that infection of *E. faecalis* OG1RF by phage VPE25 induces the expression of  
107 T7SS genes [24]. The *E. faecalis* OG1RF T7SS locus is absent in the commonly studied  
108 vancomycin-resistant strain V583, despite conservation of flanking genes (Fig. 1A) [32, 33]. The  
109 OG1RF T7SS is found downstream of conserved tRNA-Tyr and tRNA-Gln genes, which could  
110 facilitate recombination or integration of new DNA [34], but no known recombination or  
111 integration sites were identified on the 3' end of this locus. Homologs of the *E. faecalis* T7SS  
112 gene *esxA* are found throughout three of the four *Enterococcus* species groups [35], including  
113 *Enterococcus faecium*, suggesting a wide distribution of T7SS loci in enterococci (Fig. S1). In  
114 addition to *EsxA*, OG1RF encodes the core T7SS structural components *EsaA*, *EssB*, and  
115 *EssC*, which are predicted to localize to the membrane, and *EsaB*, a small predicted  
116 cytoplasmic protein (Fig. 1A) [36]. OG1RF\_11102 encodes an additional putative membrane  
117 protein, although it does not share sequence homology with staphylococcal or streptococcal  
118 *EssA*. We were unable to identify an *EssA* homolog in OG1RF using sequence-based  
119 homology searches, suggesting that the enterococcal T7SS machinery may differ from  
120 previously described T7SS found in other Gram-positive bacteria. *In silico* analyses predict that  
121 the *E. faecalis* T7SS locus encodes multiple WXG100 family effectors and LXG family  
122 polymorphic toxins [27, 37]. We hypothesized that induction of T7SS genes during phage  
123 infection and consequently the heightened production of T7SS substrates would indirectly  
124 influence the growth of non-kin phage-resistant bacterial cells.

125 To investigate if T7SS factors produced during phage infection of *E. faecalis* OG1RF  
126 interferes with the growth of phage-resistant bystander bacteria, we generated a strain with an  
127 in-frame deletion in the T7SS gene *essB*, encoding a transmembrane protein involved in the  
128 transport of T7SS substrates [38]. We chose to inactivate *essB* as opposed to the more  
129 commonly investigated secretion promoting ATPase *essC* [27, 38], because *E. faecalis* OG1RF

130 harbours two *essC* genes in its T7SS locus that may have functional redundancy (Fig. 1A). The  
131 *essB* mutant is equally susceptible to phage VPE25 infection compared to wild type *E. faecalis*  
132 OG1RF (Fig. S2A). We performed co-culture experiments where phage susceptible wild type *E.*  
133 *faecalis* OG1RF or  $\Delta$ *essB* were mixed with a phage resistant bystander, a strain of *E. faecalis*  
134 V583 deficient in the production of the VPE25 receptor ( $\Delta$ *pip*<sub>V583</sub>) [39], at a ratio of 1:1 in the  
135 absence and presence of phage VPE25 (multiplicity of infection [MOI] = 0.01) (Fig. 1B). VPE25  
136 infected *E. faecalis* OG1RF and the  $\Delta$ *essB* mutant with similar efficiency and caused a 1000-  
137 fold reduction in the viable cell count over a period of 24 hours (Fig. S2B). Since sequence-  
138 based homology searches did not retrieve any homologs of potential antitoxins from the *E.*  
139 *faecalis* OG1RF T7SS locus in *E. faecalis* V583 genome, this strain likely lacks immunity to  
140 toxins encoded in this locus. The viability of *E. faecalis*  $\Delta$ *pip*<sub>V583</sub>, was reduced nearly 100-fold  
141 when co-cultured with *E. faecalis* OG1RF in the presence of phage VPE25 (Fig. 1C, S2C).  
142 However, growth inhibition of *E. faecalis*  $\Delta$ *pip*<sub>V583</sub> was abrogated during co-culture with phage  
143 infected *E. faecalis*  $\Delta$ *essB* and phage induced T7SS antagonism of *E. faecalis*  $\Delta$ *essB* could be  
144 restored by complementation (Fig. 1C, S2C), indicating that inhibition of phage resistant *E.*  
145 *faecalis*  $\Delta$ *pip*<sub>V583</sub> by OG1RF is T7SS dependent.

146 T7SS encoded antibacterial toxins secreted by Gram positive bacteria influence intra- and  
147 interspecies antagonism [26, 27]. While a nuclease and a membrane depolarizing toxin  
148 produced by *Staphylococcus aureus* target closely related *S. aureus* strains [26, 40],  
149 *Streptococcus intermedius* exhibits T7SS dependent antagonism against a wide-array of Gram  
150 positive bacteria [27]. To determine the target range of *E. faecalis* OG1RF T7SS antibacterial  
151 activity, we measured the viability of a panel of VPE25 insensitive Gram positive and Gram  
152 negative bacteria in our co-culture assay (Fig. 1B). Growth inhibition of the distantly related  
153 bacterial species *E. faecium* and Gram positive bacteria of diverse genera, including *S. aureus*  
154 and *Listeria monocytogenes*, occurred following co-culture with phage infected wild type *E.*  
155 *faecalis* OG1RF but not the  $\Delta$ *essB* mutant (Fig. 1D). Fitness of *Lactococcus lactis*, a lactic acid

156 bacterium like *E. faecalis*, was modestly reduced during co-culture with phage infected *E.*  
157 *faecalis* OG1RF, although these data were not statistically significant. In contrast, Gram positive  
158 pathogenic and commensal streptococci were unaffected (Fig. 1D). Similarly, phage induced  
159 T7SS activity did not inhibit any Gram negative bacteria tested (Fig. 1D). Collectively, these  
160 results show that phage predation of *E. faecalis* promotes T7SS inhibition of select bystander  
161 bacteria.

162

### 163 **Molecular basis of *E. faecalis* phage-triggered T7SS antagonism**

164 Our data demonstrate that induction of *E. faecalis* OG1RF T7SS genes during phage  
165 infection hinder the growth of select non-kin bacterial species. Antibacterial toxins deployed by  
166 Gram negative bacteria via type V and VI secretion and Gram positive T7SS require physical  
167 contact between cells to achieve antagonism [26, 27, 41, 42]. Therefore, we investigated if  
168 growth inhibition of bystander bacteria is contingent upon direct interaction with phage infected  
169 *E. faecalis* using a trans-well assay [27]. We added unfiltered supernatants from wild type *E.*  
170 *faecalis* OG1RF and  $\Delta$ essB mutant cultures grown for 24 hrs in the presence and absence of  
171 phage VPE25 (MOI = 0.01) to the top of a trans well and deposited phage resistant *E. faecalis*  
172  $\Delta$ pip<sub>V583</sub> in the bottom of the trans well. The 0.4  $\mu$ m membrane filter that separates the two wells  
173 is permeable to proteins and solutes but prevents bacterial translocation. Supernatant from  
174 phage infected wild type *E. faecalis* OG1RF did not inhibit *E. faecalis*  $\Delta$ pip<sub>V583</sub> (Fig. S3A)  
175 indicating that T7SS mediated growth interference relies on cell to cell contact. To exclude the  
176 possibility that T7SS substrates might adhere to the 0.4  $\mu$ m membrane filter in the trans-well  
177 assay, we administered both filtered and unfiltered culture supernatants directly to *E. faecalis*  
178  $\Delta$ pip<sub>V583</sub> cells ( $5 \times 10^5$  CFU/well) at a ratio of 1:10 (supernatant to bystander cells) and monitored  
179 growth over a period of 10 hours. Growth kinetics of *E. faecalis*  $\Delta$ pip<sub>V583</sub> remained similar  
180 irrespective of the presence or absence of conditioned supernatant from wild type *E. faecalis*

181 OG1RF or  $\Delta$ essB mutant cultures (Fig. S3B – S3C), further supporting the requirement of  
182 contact-dependent engagement of phage mediated T7SS inhibition.

183 We discovered that *E. faecalis* OG1RF inhibits proliferation of non-kin bacterial cells through  
184 increased expression of T7SS genes in response to phage infection, but the toxic effectors were  
185 unknown. LXG domain containing toxins are widespread in bacteria with a diverse range of  
186 predicted antibacterial activities [43, 44]. The OG1RF T7SS locus encodes two LXG-domain  
187 proteins, OG1RF\_11109 and OG1RF\_11121 (Fig. 2A). Both LXG domains were found using  
188 Pfam, but we were unable to identify predicted function or activity for either protein using  
189 sequence homology searches or structural modeling.

190 Bacterial polymorphic toxin systems can encode additional toxin fragments and cognate  
191 immunity genes, known as “orphan” toxin/immunity modules, downstream of full-length secreted  
192 effectors [45, 46]. Orphan toxins lack the N-terminal domains required for secretion or delivery,  
193 although they can encode small regions of homology that could facilitate recombination with full-  
194 length toxin genes [47]. Therefore, we sought to identify putative orphan toxins in OG1RF. We  
195 aligned the nucleotide sequences of OG1RF\_11109 and OG1RF\_11121 with downstream  
196 genes in the T7SS locus and looked for regions of similarity that might signify orphan toxins.  
197 Although the 3’ ends of OG1RF\_11111 and OG1RF\_11113 did not have homology to either  
198 OG1RF\_11109 or OG1RF\_11121, the 5’ ends of OG1RF\_11111 and OG1RF\_11113 had >75%  
199 nucleotide homology to a portion of OG1RF\_11109 (Fig. 2A, regions of homology indicated by  
200 gray shading). Similarly, OG1RF\_11123 had sequence homology to OG1RF\_11121 (Fig. 2A).  
201 We searched Pfam and ExPasy for annotated domains but were unable to identify any in  
202 OG1RF\_11111, OG1RF\_11113, or OG1RF\_11123. However, structural modeling with Phyre2  
203 [48] revealed that a portion of OG1RF\_11123 has predicted structural homology to the channel-  
204 forming domain of colicin 1a [49] (Fig. S4D).

205 Orphan toxins encoded by a secretion system in a given strain can often be found as full-  
206 length toxins in other bacteria [45, 46]. Therefore, we used the sequences of OG1RF\_11111,



207 OG1RF\_11113, and OG1RF\_11123 as input for NCBI Protein BLAST to determine whether the  
208 orphan toxins we identified in *E. faecalis* OG1RF were found in other T7SS loci. We identified  
209 homologs to these orphan toxins in other *E. faecalis* strains as well as *Listeria* sp. (Fig. S4A-C,  
210 gray shading indicates regions of homology). These homologs were longer than the *E. faecalis*  
211 OG1RF genes and encoded N-terminal LXG domains, suggesting that in *Listeria* and other *E.*  
212 *faecalis* strains, homologs to OG1RF\_11111, 11113, and 11123 are full-length toxins that could  
213 be secreted by the T7SS.

214 Interestingly, we identified an additional LXG gene product, OG1RF\_12414, in a distal locus  
215 that is again notably absent from *E. faecalis* V583 (Fig. S5A and S5B). OG1RF\_12414 has  
216 predicted structural homology to Tne2, a T6SS effector with NADase activity from  
217 *Pseudomonas protegens* (Fig. S5C) [50]. Additionally, we identified numerous C-terminal  
218 domains in LXG proteins distributed throughout the enterococci (Fig. S6). These include EndoU  
219 and Ntox44 nuclease domains [43, 51, 52], which have been characterized in effectors  
220 produced by other polymorphic toxin systems.

221 Polymorphic toxins are genetically linked to cognate immunity proteins that neutralize  
222 antagonistic activity and prevent self-intoxication [43, 52, 53]. Each of the five putative toxins in  
223 the OG1RF T7SS locus is encoded directly upstream of a small protein that could function in  
224 immunity. Whitney *et al.* demonstrated that the cytoplasmic antagonistic activity of *S.*  
225 *intermedius* LXG toxins TelA and TelB in *Escherichia coli* can be rescued by co-expression of  
226 cognate immunity factors [27]. Therefore, we examined if OG1RF\_11110, 11112, 11122, or  
227 12413 confer immunity to *E. faecalis*  $\Delta pip_{V583}$  during phage infection of *E. faecalis* OG1RF.  
228 Constitutive expression of OG1RF\_11122, and not OG1RF\_11110, 11112, or 12413, partially  
229 neutralized phage induced T7SS antagonism (Fig. 2B), confirming an essential role for the  
230 OG1RF\_11122 gene product in immunity, and suggesting that OG1RF\_11121 is at least partly  
231 responsible for T7SS mediated intra-species antagonism. However, further investigation is

232 needed to confirm whether the candidate immunity factors, OG1RF\_11110, 11112 or 12413,  
233 are stably expressed under these experimental conditions.

234 To determine the contribution of OG1RF\_11121 on intra- and interbacterial antagonism  
235 during phage infection, we measured the viability of phage resistant *E. faecalis*  $\Delta pip_{V583}$  and *S.*  
236 *aureus* in co-culture with an *E. faecalis* OG1RF variant carrying a transposon insertion in  
237 OG1RF\_11121 (OG1RF\_11121-Tn). OG1RF\_11121-Tn is equally susceptible to phage VPE25  
238 infection compared to wild type *E. faecalis* OG1RF (Fig. S2A). Similar to the  $\Delta essB$  (pCIEtm)  
239 strain carrying empty pCIEtm plasmid, phage infected OG1RF\_11121-Tn (pCIEtm) did not  
240 inhibit the growth of the bystander bacteria (Fig. 2C – 2D). We were unable to clone  
241 OG1RF\_11121 by itself into the inducible plasmid pCIEtm, suggesting leaky expression of  
242 OG1RF\_11121 is toxic. Therefore, to complement *E. faecalis* OG1RF\_11121-Tn we cloned  
243 both the OG1RF\_11121 toxin and OG1RF\_11122 antitoxin pair under the cCF10-inducible  
244 promoter in pCIEtm. Expression of both of these genes in the transposon mutant restored its  
245 ability antagonize T7SS susceptible bystanders (Fig. 2C – D). These data strongly suggest that  
246 the OG1RF\_11121 encoded LXG toxin drives *E. faecalis* T7SS mediated antagonism of  
247 bystanders following phage infection.

248

### 249 **Sub-lethal antibiotic stress promotes T7SS dependent antagonism**

250 Considering two genetically distinct phages trigger the induction of T7SS genes in *E.*  
251 *faecalis* [24], we reasoned that T7SS induction could be a result of phage mediated cellular  
252 damage and not specifically directed by a phage encoded protein. Antibiotics elicit a range of  
253 damage induced stress responses in bacteria [54-56]; therefore, independent of phage infection  
254 we investigated the effects of subinhibitory concentrations of antibiotics on T7SS expression in  
255 *E. faecalis*.

256 To investigate the influence of sublethal antibiotic concentrations on *E. faecalis* OG1RF  
257 T7SS transcription, we determined the minimum inhibitory concentrations (MIC) of ampicillin,

258 vancomycin, and daptomycin (Fig.S7A – S7C) and monitored T7SS gene expression in *E.*  
259 *faecalis* OG1RF cells treated with a sub-lethal dose of antibiotic (50% of the MIC). We found  
260 that bacterial T7SS genes were significantly upregulated in the presence of the cell membrane  
261 targeting antibiotic, daptomycin, relative to the untreated control (Fig. 3A). In contrast, the cell  
262 wall biosynthesis inhibitors ampicillin and vancomycin either did not induce or had a minor  
263 impact on T7SS mRNA levels, respectively (Fig.3A). Additionally, induction of T7SS  
264 transcription occurred when bacteria were challenged with sub-inhibitory concentrations of the  
265 DNA targeting antibiotics ciprofloxacin and mitomycin C (Fig.3B, Fig. S7D – S7E).

266 We next sought to assess the influence of daptomycin driven T7SS induction on inter-  
267 enterococcal antagonism. *E. faecalis* V583 and its derivatives are more sensitive to daptomycin  
268 compared to *E. faecalis* OG1RF strains (Fig. S8A – S8C), so we applied a reduced  
269 concentration of 2.5 µg/ml daptomycin in the co-culture inhibition assay to prevent daptomycin  
270 intoxication of *E. faecalis*  $\Delta pip_{V583}$  bystanders. Because *E. faecalis* OG1RF T7SS gene  
271 expression is less robust in the presence of 2.5 µg/ml compared to 6.25 µg/ml daptomycin,  
272 which was used in our previous experiments (Fig. 3A and S8D), a 10:1 ratio of daptomycin  
273 treated *E. faecalis* OG1RF was required for growth inhibition of *E. faecalis*  $\Delta pip_{V583}$  during co-  
274 culture (Fig. 3C). Consistent with our previous results, daptomycin induced T7SS inhibition of *E.*  
275 *faecalis*  $\Delta pip_{V583}$  was contact dependent (Fig. 3D). To increase T7SS mediated contact-  
276 dependent killing of the target strain during daptomycin exposure, we performed the inhibition  
277 assay on nutrient agar plates. The sub-inhibitory concentration of daptomycin (2.5 µg/ml) used  
278 in liquid culture was toxic to the cells on agar plates (Fig. S8E), so we lowered the daptomycin  
279 concentration to 0.5 µg/ml to prevent drug toxicity in the agar-based antagonism assay. Plating  
280 T7SS producing *E. faecalis* OG1RF cells and *E. faecalis*  $\Delta pip_{V583}$  bystander cells at a ratio of  
281 10:1 resulted in ~10-fold inhibition of bystander growth (Fig. 3E). Although 0.5 µg/ml of  
282 daptomycin did not dramatically increase *E. faecalis* OG1RF T7SS transcript abundances, this  
283 was sufficient to promote daptomycin mediated T7SS inhibition of bystanders on agar plates

284 (Fig. 3E and Fig. S8E). These data show that in addition to phages, antibiotics can be sensed  
285 by *E. faecalis* thereby inducing T7SS antagonism of non-kin bacterial cells. These data also  
286 show that the magnitude of T7SS gene expression and forcing bacteria-bacteria contact is  
287 directly related to the potency of T7SS inhibition.

288

### 289 **The primary bile acid sodium cholate does not modulate *E. faecalis* T7SS gene** 290 **expression**

291 To gain insight into host-associated environmental cues that could trigger *E. faecalis*  
292 OG1RF T7SS, we measured T7SS transcription in the presence of a sub-inhibitory  
293 concentration of the primary bile acid sodium cholate, an abundant compound found in the  
294 mammalian intestinal tract and that is known to promote bacterial cell membrane stress [57, 58].  
295 4% sodium cholate, a concentration that has been shown to severely impair the growth of *E.*  
296 *faecalis* OG1RF cell envelop mutants, caused only a minor reduction in cell density of wild type  
297 *E. faecalis* OG1RF [59] (Fig. S9A) and it did not stimulate T7SS gene expression (Fig. S9B).  
298 Collectively, these data show that T7SS induction in *E. faecalis* occurs in response to select cell  
299 envelope stressors.

300

### 301 **IreK and OG1RF\_11099 facilitate T7SS expression in phage infected *E. faecalis* OG1RF** 302 **via a non-canonical signaling pathway**

303 Having established that both phage and daptomycin mediated membrane damage  
304 independently stimulates heightened *E. faecalis* OG1RF T7SS gene expression and  
305 antagonistic activity, we next sought to identify the genetic determinants that sense this damage  
306 and promote T7SS transcription. Two-component systems, LiaR/S and CroS/R, and the PASTA  
307 kinase family protein IreK are well-characterized modulators of enterococcal cell envelope  
308 homeostasis and antimicrobial tolerance [60-62]. Aberrant cardiolipin microdomain remodeling  
309 in the bacterial cell membrane in the absence of the LiaR response regulator results in

310 daptomycin hypersensitivity and virulence attenuation [63]. CroS/R signaling and subsequent  
311 modulation of gene expression govern cell wall integrity and promote resistance to  
312 cephalosporins, glycopeptides and beta—lactam antibiotics [64-66]. The *ireK* encoded  
313 transmembrane Ser/Thr kinase regulates cell wall homeostasis, antimicrobial resistance, and  
314 contributes to bacterial fitness during long-term colonization of the intestinal tract [61, 67, 68].  
315 Recently it has been shown that direct cross-talk between IreK and the CroS/R system  
316 positively impacts enterococcal cephalosporin resistance [69].

317 Wild type *E. faecalis* OG1RF, an *ireK* in-frame deletion mutant [61] and transposon (Tn)  
318 insertion mutants of *liaR*, *liaS*, *croR*, and *croS* [70] all display similar growth kinetics in the  
319 absence of phage VPE25 infection (Fig.S10A). Although *croR*-Tn and *croS*-Tn exhibit  
320 reductions in the plaquing efficiency of VPE25 particles, none of these genetic elements of  
321 enterococcal cell wall homeostasis and antibiotic resistance were required for VPE25 infection  
322 (Fig.S10B). We queried the expression levels of T7SS genes in these isogenic mutants during  
323 phage VPE25 infection (MOI = 1). T7SS gene expression was not enhanced in the  $\Delta ireK$  mutant  
324 during phage infection (Fig.4A), whereas *liaR*-Tn, *liaS*-Tn, *croR*-Tn, and *croS*-Tn produced  
325 heightened levels of T7SS transcripts similar to the wild type *E. faecalis* OG1RF compared to  
326 the uninfected controls (Fig.S11A – S11F). A sub-lethal concentration of the cephalosporin  
327 ceftriaxone did not induce T7SS gene expression (Fig. S12A), indicating that expression of  
328 T7SS genes following phage mediated membrane damage signals through a pathway that is  
329 distinct from the IreK response to cephalosporin stress. Additionally, the  $\Delta ireK$  mutant  
330 phenocopies the  $\Delta essB$  mutant strain in the interbacterial antagonism co-culture assay, wherein  
331 the  $\Delta ireK$  mutant is unable to mediate phage induced T7SS dependent killing of the phage  
332 resistant *E. faecalis*  $\Delta pip_{V583}$  non-kin cells (Fig. 4B). T7SS antagonism is restored in *E. faecalis*  
333  $\Delta ireK$  by introducing the wild type gene in *trans* (Fig. 4B). Collectively, these results indicate that  
334 IreK senses phage mediated membrane damage promoting T7SS transcription independent of  
335 the CroS/R pathway.

336 OG1RF\_11099, located immediately upstream of the T7SS cluster is predicted to encode a  
337 GntR family transcriptional regulator, thus we sought to assess the contribution of  
338 OG1RF\_11099 on T7SS transcription and functionality. *E. faecalis* OG1RF carrying a  
339 transposon insertion in OG1RF\_11099 is equally susceptible to phage VPE25 infection  
340 compared to wild type *E. faecalis* OG1RF (Fig. S2A) In contrast to wild type *E. faecalis* OG1RF,  
341 T7SS genes were not induced during phage predation of *E. faecalis* OG1RF\_11099-Tn (Fig.  
342 4C). We evaluated the influence of OG1RF\_11099-dependent regulation on the activity of T7SS  
343 in intraspecies antagonism using our co-culture assay. Similar to *E. faecalis*  $\Delta$ essB, the  
344 OG1RF\_11099-Tn mutant displayed attenuated T7SS activity in phage infected co-cultures  
345 (Fig. 4D). T7SS dependent antagonism of *E. faecalis* OG1RF\_11099-Tn could be restored  
346 following complementation (Fig. 4D). Collectively, these results indicate that *OG1RF\_11099*  
347 encodes a positive regulator of *E. faecalis* T7SS important for phage mediated inhibition of  
348 bystander bacteria. Given that IreK governs downstream signaling events via phosphorylation  
349 [71], and the fact that OG1RF\_11099 was not differentially expressed in response to phage  
350 infection of wild type *E. faecalis* OG1RF or *ireK* mutant strains (Fig. S12B), suggests that either  
351 post-translational modification of OG1RF\_11099 or a yet unidentified protein downstream of  
352 IreK engaging with OG1RF\_11099 accounts for T7SS gene expression during phage infection.

353

## 354 Discussion

355 Despite the fact that bacteria exist in complex microbial communities that socially interact  
356 [72, 73], phage predation studies have primarily been performed in monoculture [24, 74-76].  
357 Studies report phage-mediated effects on non-target bacteria linked to interbacterial interactions  
358 and evolved phage tropism for non-cognate bacteria [77-79], whereas other studies have  
359 identified minimal changes in microbiota diversity during phage therapy [77, 80].

360 Our results extend previous work that observed the induction of *E. faecalis* OG1RF T7SS  
361 gene expression in response to phage infection [24]. By using an *in vitro* antibacterial

362 antagonism assay, we discovered that phage predation of *E. faecalis* OG1RF has an inhibitory  
363 effect on non-phage targeted bacterial species during co-culture. Our work shows that phage  
364 mediated inhibition of Gram positive bystander bacteria relies on the expression and activity of  
365 T7SS genes. This work establishes a framework to begin investigating if and how phage  
366 infection of target bacteria influences non-target bacterial populations in complex communities  
367 such as the microbiota.

368 Our data suggest that membrane stress associated with phage infection or sub-lethal  
369 daptomycin treatment stimulates T7SS mediated antibacterial antagonism of *E. faecalis* OG1RF  
370 (Fig. 5). Given that daptomycin is used to target vancomycin-resistant enterococcal infections,  
371 this finding provides a hypothesis for how antibiotic-resistant enterococci achieve overgrowth  
372 and dominate the microbiota following antibiotic treatment. Further investigation is required to  
373 understand how T7SS induction might contribute to enterococcal fitness in polymicrobial  
374 environments. Although exposure to a sub-inhibitory level of primary bile salt (a common  
375 molecule found in the intestine) did not elicit T7SS expression, it is possible that other stressors  
376 encountered in the intestinal tract, including lysozyme, antimicrobial proteins, and nutrient  
377 availability could influence T7SS activity in *E. faecalis*. Indeed, *E. faecalis* T7SS mutants are  
378 defective in their ability to colonize the murine reproductive tract, which like the intestine is a  
379 polymicrobial environment [36].

380 We discovered that transcriptional activation of the T7SS during phage infection relies on  
381 IreK (Fig. 5). Previously characterized IreK-mediated stress response pathways, including  
382 cephalosporin stress or CroS/R signaling, did not contribute to T7SS expression. We  
383 hypothesize that IreK senses diverse environmental stressors and coordinates distinct outputs  
384 in response to specific stimuli. Considering that IreK signaling is important for *E. faecalis*  
385 intestinal colonization [68], it is possible that IreK-dependent T7SS expression in response to  
386 intestinal cues modulate interbacterial interactions and enterococcal persistence in the intestine.  
387 However, the molecular mechanism by which IreK facilitates T7SS transcription remains

388 unanswered. Additionally, we currently do not know if IreK directly senses phage or daptomycin  
389 mediated membrane damage or some other signal feeds into IreK to facilitate T7SS induction.

390 Additionally, we discovered that *E. faecalis* OG1RF T7SS transcription is regulated a GntR-  
391 family transcriptional regulator encoded by OG1RF\_11099, a gene found immediately upstream  
392 of the T7SS cluster (Fig. 5). Interestingly, OG1RF\_11099 is highly conserved across  
393 enterococci, including *E. faecalis* V583 (Fig. 1A) and other strains that lack T7SS. The presence  
394 of a conserved transcriptional regulator in the absence of its target genetic region supports the  
395 idea that certain strains of enterococci have undergone genome reduction as an evolutionary  
396 strategy to adapt to unique host and non-host environments. It is possible that in *E. faecalis*  
397 V583, the OG1RF\_11099 homolog (EF1328) has been retained to regulate other genes within  
398 the regulon that are less dispensable than T7SS. Additionally, our data indicate that  
399 OG1RF\_11099 transcription is not dependent on IreK or and is not induced during phage  
400 infection of wild type *E. faecalis* OG1RF. Previously published work demonstrated that IreK  
401 kinase activity is essential for driving the cell wall stress response in *E. faecalis* [67, 71].  
402 Therefore, we hypothesize that IreK directly or indirectly regulates OG1RF\_11099 activity for  
403 T7SS expression via post-translational modification.

404 Antibacterial properties of T7SS substrates have been demonstrated [26, 27, 40]. Here we  
405 provide evidence that mutation in the LXG toxin encoded by OG1RF\_11121 abrogates phage  
406 induced T7SS dependent inhibition of bystander bacteria while expression of the downstream  
407 immunity gene OG1RF\_11122 in T7SS targeted *E. faecalis*  $\Delta pip_{V583}$  cells conferred partial  
408 protection from this inhibition. It is possible that constitutive expression of OG1RF\_11122 from a  
409 multicopy plasmid results in elevated accumulation of OG1RF\_11122 in the bystander strain  
410 which is toxic and could account for the partial protection phenotype. Aside from its LXG  
411 domain, OG1RF\_11121 does not harbor any other recognizable protein domains, hence the  
412 mechanism underlying its toxicity is unclear. Whitney *et al.* demonstrated that LXG toxin  
413 antagonism is contact-dependent, having minimal to no impact on target cells in liquid media



414 [27]. Although we found that physical engagement is crucial for *E. faecalis* T7SS mediated  
415 antagonism, we observed a significant reduction in target cell growth in liquid media both during  
416 phage and daptomycin treatment of T7SS proficient *E. faecalis*.

417 In contrast to the broad antagonism of *S. intermedius* T7SS [27], the *E. faecalis* OG1RF  
418 T7SS targets a more limited number of bacterial species. Interestingly, *E. faecalis* OG1RF T7SS  
419 antagonism is ineffective against various species of streptococci, which like the enterococci are  
420 lactic acid bacteria. Nucleotide- and protein-based homology searches did not reveal  
421 homologs of candidate immunity proteins, OG1RF\_11110, OG1RF\_11112, OG1RF\_11122, or  
422 OG1RF\_12413, in *S. agalactiae* COH1. Genome sequences of the other four streptococci used  
423 in this present study are not available, and hence we cannot comment on the presence of  
424 potential immunity proteins against OG1RF T7SS toxins in these strains. However, resistance of  
425 multiple streptococcal species to OG1RF T7SS mediated inhibition suggest that common cell  
426 surface modifications, e.g., capsule or surface polysaccharides, might be responsible for  
427 blocking toxin activity. Narrow target range is a common attribute of contact-dependent toxins  
428 that interact with specific membrane receptors on target cells to exert inhibitory activity [81].  
429 However, specific receptors of T7SS toxins are yet to be identified. It is possible that specific or  
430 non-specific interactions between the *E. faecalis* OG1RF and *S. aureus* or *L. monocytogenes*  
431 cell surfaces facilitate T7SS interbacterial antagonism and such interactions are incompatible or  
432 occluded for the streptococci.

433 It is currently unknown whether T7SS toxin delivery requires contact with a receptor on  
434 target cells or whether delivery can occur in the absence of a receptor. Examples of both  
435 methods of toxin delivery are widespread in bacteria. Toxins such as colicins and R-pyocins  
436 mediate contact with target cells via protein receptors and LPS, respectively [82-84]. Delivery of  
437 colicins and toxins produced by contact-dependent inhibition systems in Gram-negative bacteria  
438 requires interactions with receptors at the outer and inner membranes [85, 86]. Conversely, the  
439 T6SS needle-like machinery that punctures target cell envelopes delivers toxins in a contact-

440 dependent, receptor-independent manner [87]. Cell surface moieties can also affect recognition  
441 of target cells and subsequent toxin delivery. The presence of capsule can block target cell  
442 recognition by contact-dependent growth inhibition systems in *Acinetobacter baumannii* [88], *E.*  
443 *coli* [89] and *Klebsiella pneumoniae* [90]. Therefore, it is possible that a feature of the  
444 streptococcal cell surface, such as capsule modifications, renders them insensitive to killing by  
445 toxins delivered by the *E. faecalis* OG1RF T7SS.

446 Enterococci occupy polymicrobial infections often interacting with other bacteria [91-94].  
447 Although commensal *E. faecalis* antagonize virulent *S. aureus* through the production of  
448 superoxide [95], the two species also exhibit growth synergy via exchange of critical nutrients  
449 [96]. Here, we show that phage treatment of *E. faecalis* OG1RF can indirectly impact the growth  
450 of neighboring phage-resistant bacteria, including *S. aureus*, in a T7SS–dependent manner,  
451 suggesting that phage therapy directed against enterococci driving T7SS activity could be useful  
452 for the treatment of polymicrobial infections. However, the counter argument is that phage  
453 therapy directed against enterococci could push a bacterial community toward dysbiosis, as  
454 phage induced T7SS activity could directly inhibit beneficial bystander bacteria. This raises  
455 questions about the consequences of phage mediated off-target effects on bacteria. Could  
456 phage induced T7SS activity be used to reduce phage expansion into other closely related  
457 strains as a means to dilute phages out of a population, or is it simply that phage induction of  
458 the T7SS serves as a mechanism that benefits a select few within a population to aid in their  
459 reoccupation of a niche upon overcoming phage infection? Future studies aimed at exploring  
460 enterococcal T7SS antagonism in polymicrobial communities should help elucidate the impact  
461 of phages on microbial community composition.

462

## 463 **Materials and Methods**

464 **Bacteria and bacteriophages.** Bacteria and phages used in this study are listed in Table S1.  
465 Bacteria were grown with aeration in Todd-Hewitt broth (THB) or on THB agar supplemented

466 with 10mM MgSO<sub>4</sub> at 37°C. The following antibiotic concentrations were added to media for the  
467 selection of specific bacterial strains or species: *E. faecalis* OG1RF (25 µg/ml fusidic acid, 50  
468 µg/ml rifampin), *E. faecalis* V583  $\Delta$ *pip*<sub>V583</sub> (25 µg/ml or 100 µg/ml gentamicin in liquid and agar  
469 media, respectively), *S. aureus* AH2146 LAC  $\Phi$ 11:LL29 (1 µg/ml tetracycline), *L.*  
470 *monocytogenes* 10403S (100 µg/ml streptomycin), *S. gordonii* ATCC® 49818 (500 µg/ml  
471 streptomycin), *S. salivarius* K12 (100 µg/ml spectinomycin), *V. cholerae* C6706 int I4::TnFL63  
472 and *S. enterica* serovar Typhimurium 140285 put::Kan (50 µg/ml kanamycin). *S. agalactiae*  
473 COH1 was distinguished from *E. faecalis* on Chrome indicator Agar (CHROMagar StrepB  
474 SB282). We were unable to differentially select *E. coli*, *L. lactis*, *S. pyogenes* and *S. mitis* from  
475 *E. faecalis* based on antibiotic sensitivity. Therefore, colony counts of these bacteria in co-  
476 culture experiments were acquired by subtracting the *E. faecalis* colony numbers on selective  
477 media from the total number of colonies on non-selective media. Strains harboring pLZ12A and  
478 its derivatives were grown in the presence of 20 µg/ml chloramphenicol and strains carrying  
479 pCIEtm and pCIEtm derivatives were selected on media containing 5 µg/ml tetracycline.

480  
481 **Bioinformatic analyses.** Genome sequences of *E. faecalis* V583 (NC\_004668.1) and OG1RF  
482 (NC\_017316.1) were obtained from NCBI. Alignments were generated and visualized using  
483 EasyFig [97]. OG1RF protein domains were identified using KEGG [98] and ExPASy PROSITE  
484 [99]. Structure modeling of OG1RF\_12414 was done with Phyre2 [48]. Crystal structures  
485 overlays were generated using Pymol [100]. The EsxA phylogenetic tree was constructed in  
486 MEGA version X [101] using non-redundant protein sequences obtained from NCBI BLAST  
487 [102] with OG1RF\_11100 as input and was edited using the Interactive Tree Of Life browser  
488 [103]. OG1RF\_11109 was used as an input for the NCBI Conserved Domain Architecture  
489 Retrieval Tool [104] to identify protein domains that co-occur with LXG domains in *Enterococcus*  
490 (NCBI:txid1350).

491

492 **Antibiotic sensitivity profiles.** Antibiotic susceptibility profiles for ampicillin, vancomycin, and  
493 daptomycin were determined using a broth microdilution assay. Overnight (O/N) *E. faecalis*  
494 OG1RF cultures were diluted to  $5 \times 10^6$  CFU/ml and 100  $\mu$ l was added to each well of a 96-  
495 well plate to give a final cell density of  $5 \times 10^5$  CFU/ml. Antibiotic stocks were added to the  
496 first column of each row, mixed thoroughly, and serially diluted 2-fold across the rows. The last  
497 column was used as a no drug control. Cultures containing daptomycin were supplemented with  
498 50  $\mu$ g/ml CaCl<sub>2</sub>. Bacterial growth was monitored by measuring absorbance (OD<sub>600</sub>) using a  
499 Synergy H1 microplate reader set to 37°C with continuous shaking O/N. Growth curves are  
500 presented as the average of three biological replicates. A concentration of antibiotic just below  
501 the drug amount that inhibits bacterial growth was deemed sub-lethal and used to examine  
502 T7SS genes expression.

503

504 **Co-culture bacterial antagonism assays.** For inter- and intraspecies antagonism assays in  
505 liquid media, O/N cultures of different bacteria were diluted in THB containing 10mM MgSO<sub>4</sub> to  
506 an OD<sub>600</sub> of 0.2 and mixed together in a 1:1 or 10:1 ratio. The mixed cell suspensions were  
507 either left untreated or treated with phage VPE25 (MOI 0.01) or daptomycin (2.5  $\mu$ g/ml) and  
508 grown at 37°C with aeration. For pheromone induction of genes OG1RF\_11121, *ireK* and  
509 OG1RF\_11099 cloned into pCIEtm, 10 ng/ml cCF10 (from Mimotopes) was added at the time of  
510 phage administration. For antagonism experiments on agar plates, O/N cultures of different  
511 strains were diluted to an OD<sub>600</sub> of 0.2 and mixed together in a 1:1 or 10:1 ratio. A total of  $10^7$   
512 cells from mixed culture suspension was added to 5 ml THB + 0.35% agar at 55°C and were  
513 poured over the surface of a THB agar plate in the absence or presence of daptomycin (0.5  
514  $\mu$ g/ml). The plates were incubated at 37°C under static conditions for 24 hours. Cells were  
515 harvested by scraping off the top agar, resuspending in 5 ml of PBS, and the cfus were obtained  
516 by plating serially diluted cell suspension on appropriate selective agar plates. Relative viability

517 was calculated from the ratio of target strain cfu in the treated versus the untreated co-culture.

518 The assays were performed in biological triplicates.

519

520 **RNA extraction and quantitative PCR.** RNA was extracted from phage, antibiotic, or 4%  
521 sodium cholate treated or untreated *E. faecalis* OG1RF cells using an RNeasy Mini Kit (Qiagen)  
522 with the following published modifications [24]. cDNA was generated from 1 µg of RNA using  
523 qScript cDNA SuperMix (QuantaBio) and transcript levels were analyzed by qPCR using  
524 PowerUp™ SYBR Green Master Mix (Applied Biosystems). Transcript abundances were  
525 normalized to 16S rRNA gene transcripts and fold-change was calculated by comparing to  
526 untreated controls. All data are represented as the average of three biological replicates.

527

528 **Bacterial growth curves.** 25 ml of 10mM MgSO<sub>4</sub> supplemented THB was inoculated with O/N  
529 cultures of *E. faecalis* diluted to an OD<sub>600</sub> of 0.025 and distributed to a 96-well plate in 0.1 ml  
530 volumes. Cultures were incubated at 37° C with aeration. OD<sub>600</sub> was measured periodically for  
531 18 hours in a Synergy H1 microplate reader.

532

533 **Efficiency of plating (EOP) assays.** To investigate if phage VPE25 can infect and lyse *E.*  
534 *faecalis* mutants and various other bacterial species, 10<sup>7</sup> PFU/ml of phage was serially diluted  
535 and the phage was titered on each strain using a THB agar overlay plaque assay. EOP is  
536 expressed as the percentage of phage titer from each strain relative to the wild type *E. faecalis*  
537 OG1RF control. Data are presented as the average of three biological replicates.

538

539 **Construction of *E. faecalis* mutants and complementation.** Isolation of *E. faecalis* genomic  
540 DNA was performed using a ZymoBIOMICS™ DNA Miniprep Kit (Zymo Research). All PCR  
541 used for cloning were performed with high fidelity KOD Hot Start DNA Polymerase (EMD  
542 Millipore). *E. faecalis* Δ*essB* was generated by allelic replacement by cloning an in frame *essB*

543 deletion product into pLT06 using Gibson Assembly® Master Mix (New England Biolabs),  
544 integrating this construct into the chromosome, and resolving the deletion mutant by  
545 homologous recombination [105-107]. For ectopic expression of putative immunity proteins,  
546 coding regions of OG1RF\_11110, OG1RF\_11112, OG1RF\_11122, and OG1RF\_12413 were  
547 cloned downstream of the *bacA* promoter ( $P_{bacA}$ ) by restriction digestion and ligation into the  
548 shuttle vector pLZ12A [20]. Coding regions of *ireK* and OG1RF\_11099 were cloned downstream  
549 of the cCF10 responsive promoter ( $P_Q$ ) by restriction digestion and ligation into pCIE and  
550 pCIEtm vectors, respectively. As attempts to clone OG1RF\_11121 by itself were unsuccessful,  
551 we cloned the OG1RF\_11121 and OG1RF\_11122 open reading frames, which overlap by 13  
552 base pairs, together under the  $P_Q$  promoter in pCIEtm plasmid. Primer sequences and  
553 restriction enzymes used for cloning are listed in Table S1. Plasmids were introduced into  
554 electrocompetent *E. faecalis* cells as previously described [20].

555

556 **Statistical analysis.** Statistical tests were performed using GraphPad – Prism version 8.2.1.  
557 For qPCR and bacterial competition assays, unpaired Student's t-tests were used. *P* values are  
558 indicated in the figure legends.

559

560 **Data availability.** All raw data are available upon request.

561

## 562 **References**

563 1. Lebreton F, Willems RJL, Gilmore MS. *Enterococcus* diversity, origins in nature, and gut  
564 colonization. In: Gilmore MS, Clewell DB, Ike Y, Shankar N, editors. Enterococci: from  
565 commensals to leading causes of drug resistant infection. Boston2014.

- 566 2. Onderdonk AB, Bartlett JG, Louie T, Sullivan-Seigler N, Gorbach SL. Microbial synergy  
567 in experimental intra-abdominal abscess. *Infect Immun*. 1976;13(1):22-6. Epub 1976/01/01.  
568 PubMed PMID: 814099; PubMed Central PMCID: PMCPMC420571.
- 569 3. Weiner-Lastinger LM, Abner S, Edwards JR, Kallen AJ, Karlsson M, Magill SS, et al.  
570 Antimicrobial-resistant pathogens associated with adult healthcare-associated infections:  
571 Summary of data reported to the National Healthcare Safety Network, 2015-2017. *Infect Control  
572 Hosp Epidemiol*. 2020;41(1):1-18. Epub 2019/11/27. doi: 10.1017/ice.2019.296. PubMed PMID:  
573 31767041.
- 574 4. Arias CA, Panesso D, McGrath DM, Qin X, Mojica MF, Miller C, et al. Genetic basis for  
575 *in vivo* daptomycin resistance in enterococci. *N Engl J Med*. 2011;365(10):892-900. Epub  
576 2011/09/09. doi: 10.1056/NEJMoa1011138. PubMed PMID: 21899450; PubMed Central  
577 PMCID: PMCPMC3205971.
- 578 5. Liu Y, Wang Y, Wu C, Shen Z, Schwarz S, Du XD, et al. First report of the multidrug  
579 resistance gene *cfr* in *Enterococcus faecalis* of animal origin. *Antimicrob Agents Chemother*.  
580 2012;56(3):1650-4. Epub 2011/12/29. doi: 10.1128/AAC.06091-11. PubMed PMID: 22203597;  
581 PubMed Central PMCID: PMCPMC3294887.
- 582 6. Patel SN, Memari N, Shahinas D, Toye B, Jamieson FB, Farrell DJ. Linezolid resistance  
583 in *Enterococcus faecium* isolated in Ontario, Canada. *Diagn Microbiol Infect Dis*.  
584 2013;77(4):350-3. Epub 2013/10/08. doi: 10.1016/j.diagmicrobio.2013.08.012. PubMed PMID:  
585 24095643.
- 586 7. Ubeda C, Taur Y, Jenq RR, Equinda MJ, Son T, Samstein M, et al. Vancomycin-  
587 resistant *Enterococcus* domination of intestinal microbiota is enabled by antibiotic treatment in  
588 mice and precedes bloodstream invasion in humans. *J Clin Invest*. 2010;120(12):4332-41. Epub

589 2010/11/26. doi: 10.1172/JCI43918. PubMed PMID: 21099116; PubMed Central PMCID:  
590 PMCPMC2993598.

591 8. Zirakzadeh A, Patel R. Vancomycin-resistant enterococci: colonization, infection,  
592 detection, and treatment. *Mayo Clin Proc.* 2006;81(4):529-36. Epub 2006/04/14. doi:  
593 10.4065/81.4.529. PubMed PMID: 16610573.

594 9. Taur Y, Xavier JB, Lipuma L, Ubeda C, Goldberg J, Gobourne A, et al. Intestinal  
595 domination and the risk of bacteremia in patients undergoing allogeneic hematopoietic stem cell  
596 transplantation. *Clin Infect Dis.* 2012;55(7):905-14. Epub 2012/06/22. doi: 10.1093/cid/cis580.  
597 PubMed PMID: 22718773; PubMed Central PMCID: PMCPMC3657523.

598 10. Munoz-Price LS, Lolans K, Quinn JP. Emergence of resistance to daptomycin during  
599 treatment of vancomycin-resistant *Enterococcus faecalis* infection. *Clin Infect Dis.*  
600 2005;41(4):565-6. Epub 2005/07/20. doi: 10.1086/432121. PubMed PMID: 16028170.

601 11. Palmer KL, Daniel A, Hardy C, Silverman J, Gilmore MS. Genetic basis for daptomycin  
602 resistance in enterococci. *Antimicrob Agents Chemother.* 2011;55(7):3345-56. Epub  
603 2011/04/20. doi: 10.1128/AAC.00207-11. PubMed PMID: 21502617; PubMed Central PMCID:  
604 PMCPMC3122436.

605 12. Jasni AS, Mullany P, Hussain H, Roberts AP. Demonstration of conjugative transposon  
606 (Tn5397)-mediated horizontal gene transfer between *Clostridium difficile* and *Enterococcus*  
607 *faecalis*. *Antimicrob Agents Chemother.* 2010;54(11):4924-6. Epub 2010/08/18. doi:  
608 10.1128/AAC.00496-10. PubMed PMID: 20713671; PubMed Central PMCID:  
609 PMCPMC2976158.

610 13. Palmer KL, Kos VN, Gilmore MS. Horizontal gene transfer and the genomics of  
611 enterococcal antibiotic resistance. *Curr Opin Microbiol.* 2010;13(5):632-9. Epub 2010/09/15. doi:



- 612 10.1016/j.mib.2010.08.004. PubMed PMID: 20837397; PubMed Central PMCID:  
613 PMCPMC2955785.
- 614 14. Chang S, Sievert DM, Hageman JC, Boulton ML, Tenover FC, Downes FP, et al.  
615 Infection with vancomycin-resistant *Staphylococcus aureus* containing the *vanA* resistance  
616 gene. N Engl J Med. 2003;348(14):1342-7. Epub 2003/04/04. doi: 10.1056/NEJMoa025025.  
617 PubMed PMID: 12672861.
- 618 15. Kurenbach B, Bohn C, Prabhu J, Abudukerim M, Szewzyk U, Grohmann E. Intergeneric  
619 transfer of the *Enterococcus faecalis* plasmid pIP501 to *Escherichia coli* and *Streptomyces*  
620 *lividans* and sequence analysis of its *tra* region. Plasmid. 2003;50(1):86-93. Epub 2003/06/27.  
621 PubMed PMID: 12826062.
- 622 16. Kortright KE, Chan BK, Koff JL, Turner PE. Phage therapy: a renewed approach to  
623 combat antibiotic-resistant bacteria. Cell Host Microbe. 2019;25(2):219-32. Epub 2019/02/15.  
624 doi: 10.1016/j.chom.2019.01.014. PubMed PMID: 30763536.
- 625 17. Cheng M, Liang J, Zhang Y, Hu L, Gong P, Cai R, et al. The bacteriophage EF-P29  
626 efficiently protects against lethal vancomycin-resistant *Enterococcus faecalis* and alleviates gut  
627 microbiota imbalance in a murine bacteremia model. Front Microbiol. 2017;8:837. Epub  
628 2017/05/26. doi: 10.3389/fmicb.2017.00837. PubMed PMID: 28536572; PubMed Central  
629 PMCID: PMCPMC5423268.
- 630 18. Gelman D, Beyth S, Lerer V, Adler K, Poradosu-Cohen R, Copenhagen-Glazer S, et al.  
631 Combined bacteriophages and antibiotics as an efficient therapy against VRE *Enterococcus*  
632 *faecalis* in a mouse model. Res Microbiol. 2018;169(9):531-9. Epub 2018/05/20. doi:  
633 10.1016/j.resmic.2018.04.008. PubMed PMID: 29777835.

- 634 19. Uchiyama J, Rashel M, Takemura I, Wakiguchi H, Matsuzaki S. *In silico* and *in vivo*  
635 evaluation of bacteriophage phiEF24C, a candidate for treatment of *Enterococcus faecalis*  
636 infections. *Appl Environ Microbiol.* 2008;74(13):4149-63. Epub 2008/05/06. doi:  
637 10.1128/AEM.02371-07. PubMed PMID: 18456848; PubMed Central PMCID:  
638 PMCPMC2446516.
- 639 20. Chatterjee A, Johnson CN, Luong P, Hullahalli K, McBride SW, Schubert AM, et al.  
640 Bacteriophage resistance alters antibiotic-mediated intestinal expansion of enterococci. *Infect*  
641 *Immun.* 2019;87(6):e00085-19. Epub 2019/04/03. doi: 10.1128/IAI.00085-19. PubMed PMID:  
642 30936157; PubMed Central PMCID: PMCPMC6529655.
- 643 21. Lin DM, Koskella B, Lin HC. Phage therapy: an alternative to antibiotics in the age of  
644 multi-drug resistance. *World J Gastrointest Pharmacol Ther.* 2017;8(3):162-73. Epub  
645 2017/08/23. doi: 10.4292/wjgpt.v8.i3.162. PubMed PMID: 28828194; PubMed Central PMCID:  
646 PMCPMC5547374.
- 647 22. Loc-Carrillo C, Abedon ST. Pros and cons of phage therapy. *Bacteriophage.*  
648 2011;1(2):111-4. Epub 2012/02/16. doi: 10.4161/bact.1.2.14590. PubMed PMID: 22334867;  
649 PubMed Central PMCID: PMCPMC3278648.
- 650 23. Wu S, Zachary E, Wells K, Loc-Carrillo C. Phage Therapy: future inquiries. *Postdoc J.*  
651 2013;1(6):24-35. Epub 2013/06/01. PubMed PMID: 28286802; PubMed Central PMCID:  
652 PMCPMC5342839.
- 653 24. Chatterjee A, Willett JLE, Nguyen UT, Monogue B, Palmer KL, Dunny GM, et al. Parallel  
654 Genomics Uncover Novel Enterococcal-Bacteriophage Interactions. *mBio.* 2020;11(2). Epub  
655 2020/03/05. doi: 10.1128/mBio.03120-19. PubMed PMID: 32127456; PubMed Central PMCID:  
656 PMCPMC7064774.

- 657 25. Unnikrishnan M, Constantinidou C, Palmer T, Pallen MJ. The enigmatic Esx proteins:  
658 looking beyond mycobacteria. *Trends Microbiol.* 2017;25(3):192-204. Epub 2016/11/30. doi:  
659 10.1016/j.tim.2016.11.004. PubMed PMID: 27894646.
- 660 26. Cao Z, Casabona MG, Kneuper H, Chalmers JD, Palmer T. The type VII secretion  
661 system of *Staphylococcus aureus* secretes a nuclease toxin that targets competitor bacteria.  
662 *Nat Microbiol.* 2016;2:16183. Epub 2016/10/11. doi: 10.1038/nmicrobiol.2016.183. PubMed  
663 PMID: 27723728; PubMed Central PMCID: PMC5325307.
- 664 27. Whitney JC, Peterson SB, Kim J, Pazos M, Verster AJ, Radey MC, et al. A broadly  
665 distributed toxin family mediates contact-dependent antagonism between Gram-positive  
666 bacteria. *Elife.* 2017;6. Epub 2017/07/12. doi: 10.7554/eLife.26938. PubMed PMID: 28696203;  
667 PubMed Central PMCID: PMC5555719.
- 668 28. Burts ML, DeDent AC, Missiakas DM. EsaC substrate for the ESAT-6 secretion pathway  
669 and its role in persistent infections of *Staphylococcus aureus*. *Mol Microbiol.* 2008;69(3):736-46.  
670 Epub 2008/06/17. doi: 10.1111/j.1365-2958.2008.06324.x. PubMed PMID: 18554323; PubMed  
671 Central PMCID: PMC2597432.
- 672 29. Ishii K, Adachi T, Yasukawa J, Suzuki Y, Hamamoto H, Sekimizu K. Induction of  
673 virulence gene expression in *Staphylococcus aureus* by pulmonary surfactant. *Infect Immun.*  
674 2014;82(4):1500-10. Epub 2014/01/24. doi: 10.1128/IAI.01635-13. PubMed PMID: 24452679;  
675 PubMed Central PMCID: PMC3993393.
- 676 30. Lopez MS, Tan IS, Yan D, Kang J, McCreary M, Modrusan Z, et al. Host-derived fatty  
677 acids activate type VII secretion in *Staphylococcus aureus*. *Proc Natl Acad Sci U S A.*  
678 2017;114(42):11223-8. Epub 2017/10/05. doi: 10.1073/pnas.1700627114. PubMed PMID:  
679 28973946; PubMed Central PMCID: PMC5651732.

- 680 31. Tchoupa AK, Watkins KE, Jones RA, Kuroki A, Alam MT, Perrier S, et al. The type VII  
681 secretion system protects *Staphylococcus aureus* against antimicrobial host fatty acids. bioRxiv.  
682 2020:572172. doi: 10.1101/572172.
- 683 32. Bourgogne A, Garsin DA, Qin X, Singh KV, Sillanpaa J, Yerrapragada S, et al. Large  
684 scale variation in *Enterococcus faecalis* illustrated by the genome analysis of strain OG1RF.  
685 Genome Biol. 2008;9(7):R110. Epub 2008/07/10. doi: 10.1186/gb-2008-9-7-r110. PubMed  
686 PMID: 18611278; PubMed Central PMCID: PMCPMC2530867.
- 687 33. Paulsen IT, Banerjee L, Myers GS, Nelson KE, Seshadri R, Read TD, et al. Role of  
688 mobile DNA in the evolution of vancomycin-resistant *Enterococcus faecalis*. Science.  
689 2003;299(5615):2071-4. Epub 2003/03/29. doi: 10.1126/science.1080613. PubMed PMID:  
690 12663927.
- 691 34. Reiter WD, Palm P, Yeats S. Transfer RNA genes frequently serve as integration sites  
692 for prokaryotic genetic elements. Nucleic Acids Res. 1989;17(5):1907-14. doi:  
693 10.1093/nar/17.5.1907. PubMed PMID: 2467253; PubMed Central PMCID: PMCPMC317532.
- 694 35. Lebreton F, Manson AL, Saavedra JT, Straub TJ, Earl AM, Gilmore MS. Tracing the  
695 enterococci from paleozoic origins to the hospital. Cell. 2017;169(5):849-61 e13. Epub  
696 2017/05/16. doi: 10.1016/j.cell.2017.04.027. PubMed PMID: 28502769; PubMed Central  
697 PMCID: PMCPMC5499534.
- 698 36. Alhajjar N, Chatterjee A, Spencer BL, Burcham LR, Willett JLE, Dunny GM, et al.  
699 Genome-wide mutagenesis identifies factors involved in *Enterococcus faecalis* vaginal  
700 adherence and persistence. Infection and Immunity. 2020:IAI.00270-20. doi: 10.1128/iai.00270-  
701 20.

- 702 37. Das C, Ghosh TS, Mande SS. *In silico* dissection of type VII secretion system  
703 components across bacteria: new directions towards functional characterization. J Biosci.  
704 2016;41(1):133-43. Epub 2016/03/08. doi: 10.1007/s12038-016-9599-8. PubMed PMID:  
705 26949095.
- 706 38. Burts ML, Williams WA, DeBord K, Missiakas DM. EsxA and EsxB are secreted by an  
707 ESAT-6-like system that is required for the pathogenesis of *Staphylococcus aureus* infections.  
708 Proc Natl Acad Sci U S A. 2005;102(4):1169-74. Epub 2005/01/20. doi:  
709 10.1073/pnas.0405620102. PubMed PMID: 15657139; PubMed Central PMCID:  
710 PMCPMC545836.
- 711 39. Duerkop BA, Huo W, Bhardwaj P, Palmer KL, Hooper LV. Molecular Basis for Lytic  
712 Bacteriophage Resistance in Enterococci. mBio. 2016;7(4). Epub 2016/09/01. doi:  
713 10.1128/mBio.01304-16. PubMed PMID: 27578757; PubMed Central PMCID:  
714 PMCPMC4999554.
- 715 40. Ulhuq FR, Gomes MC, Duggan GM, Guo M, Mendonca C, Buchanan G, et al. A  
716 membrane-depolarizing toxin substrate of the *Staphylococcus aureus* type VII secretion system  
717 mediates intraspecies competition. Proc Natl Acad Sci U S A. 2020. Epub 2020/08/10. doi:  
718 10.1073/pnas.2006110117. PubMed PMID: 32769205.
- 719 41. Garcia EC. Contact-dependent interbacterial toxins deliver a message. Curr Opin  
720 Microbiol. 2018;42:40-6. Epub 2017/10/28. doi: 10.1016/j.mib.2017.09.011. PubMed PMID:  
721 29078204; PubMed Central PMCID: PMCPMC5899628.
- 722 42. Garcia-Bayona L, Comstock LE. Bacterial antagonism in host-associated microbial  
723 communities. Science. 2018;361(6408). Epub 2018/09/22. doi: 10.1126/science.aat2456.  
724 PubMed PMID: 30237322.

- 725 43. Zhang D, de Souza RF, Anantharaman V, Iyer LM, Aravind L. Polymorphic toxin  
726 systems: comprehensive characterization of trafficking modes, processing, mechanisms of  
727 action, immunity and ecology using comparative genomics. *Biol Direct.* 2012;7:18. Epub  
728 2012/06/27. doi: 10.1186/1745-6150-7-18. PubMed PMID: 22731697; PubMed Central PMCID:  
729 PMCPMC3482391.
- 730 44. Klein TA, Pazos M, Surette MG, Vollmer W, Whitney JC. Molecular basis for immunity  
731 protein recognition of a type VII secretion system exported antibacterial toxin. *J Mol Biol.*  
732 2018;430(21):4344-58. Epub 2018/09/09. doi: 10.1016/j.jmb.2018.08.027. PubMed PMID:  
733 30194969; PubMed Central PMCID: PMCPMC6193138.
- 734 45. Jamet A, Nassif X. New players in the toxin field: polymorphic toxin systems in bacteria.  
735 *mBio.* 2015;6(3):e00285-15. Epub 2015/05/07. doi: 10.1128/mBio.00285-15. PubMed PMID:  
736 25944858; PubMed Central PMCID: PMCPMC4436062.
- 737 46. Poole SJ, Diner EJ, Aoki SK, Braaten BA, t'Kint de Roodenbeke C, Low DA, et al.  
738 Identification of functional toxin/immunity genes linked to contact-dependent growth inhibition  
739 (CDI) and rearrangement hotspot (Rhs) systems. *PLoS Genet.* 2011;7(8):e1002217. Epub  
740 2011/08/11. doi: 10.1371/journal.pgen.1002217. PubMed PMID: 21829394; PubMed Central  
741 PMCID: PMCPMC3150448.
- 742 47. Koskiniemi S, Garza-Sánchez F, Sandegren L, Webb JS, Braaten BA, Poole SJ, et al.  
743 Selection of orphan Rhs toxin expression in evolved *Salmonella enterica* serovar Typhimurium.  
744 *PLoS Genet.* 2014;10(3):e1004255. doi: 10.1371/journal.pgen.1004255. PubMed PMID:  
745 24675981; PubMed Central PMCID: PMCPMC3967940.
- 746 48. Kelley LA, Mezulis S, Yates CM, Wass MN, Sternberg MJ. The Phyre2 web portal for  
747 protein modeling, prediction and analysis. *Nat Protoc.* 2015;10(6):845-58. Epub 2015/05/07. doi:

- 748 10.1038/nprot.2015.053. PubMed PMID: 25950237; PubMed Central PMCID:  
749 PMCPMC5298202.
- 750 49. Wiener M, Freymann D, Ghosh P, Stroud RM. Crystal structure of colicin Ia. *Nature*.  
751 1997;385(6615):461-4. doi: 10.1038/385461a0. PubMed PMID: 9009197.
- 752 50. Tang JY, Bullen NP, Ahmad S, Whitney JC. Diverse NADase effector families mediate  
753 interbacterial antagonism via the type VI secretion system. *J Biol Chem*. 2018;293(5):1504-14.  
754 Epub 2017/12/15. doi: 10.1074/jbc.RA117.000178. PubMed PMID: 29237732; PubMed Central  
755 PMCID: PMCPMC5798281.
- 756 51. Michalska K, Quan Nhan D, Willett JLE, Stols LM, Eschenfeldt WH, Jones AM, et al.  
757 Functional plasticity of antibacterial EndoU toxins. *Mol Microbiol*. 2018;109(4):509-27. Epub  
758 2018/06/21. doi: 10.1111/mmi.14007. PubMed PMID: 29923643; PubMed Central PMCID:  
759 PMCPMC6173971.
- 760 52. Zhang D, Iyer LM, Aravind L. A novel immunity system for bacterial nucleic acid  
761 degrading toxins and its recruitment in various eukaryotic and DNA viral systems. *Nucleic Acids*  
762 *Res*. 2011;39(11):4532-52. Epub 2011/02/11. doi: 10.1093/nar/gkr036. PubMed PMID:  
763 21306995; PubMed Central PMCID: PMCPMC3113570.
- 764 53. Klein TA, Ahmad S, Whitney JC. Contact-dependent interbacterial antagonism mediated  
765 by protein secretion machines. *Trends Microbiol*. 2020;28(5):387-400. Epub 2020/04/17. doi:  
766 10.1016/j.tim.2020.01.003. PubMed PMID: 32298616.
- 767 54. Andersson DI, Hughes D. Microbiological effects of sublethal levels of antibiotics. *Nat*  
768 *Rev Microbiol*. 2014;12(7):465-78. Epub 2014/05/28. doi: 10.1038/nrmicro3270. PubMed PMID:  
769 24861036.

- 770 55. Bernier SP, Surette MG. Concentration-dependent activity of antibiotics in natural  
771 environments. *Front Microbiol.* 2013;4:20. Epub 2013/02/21. doi: 10.3389/fmicb.2013.00020.  
772 PubMed PMID: 23422936; PubMed Central PMCID: PMCPMC3574975.
- 773 56. Yim G, Wang HH, Davies J. Antibiotics as signalling molecules. *Philos Trans R Soc*  
774 *Lond B Biol Sci.* 2007;362(1483):1195-200. Epub 2007/03/16. doi: 10.1098/rstb.2007.2044.  
775 PubMed PMID: 17360275; PubMed Central PMCID: PMCPMC2435582.
- 776 57. Flahaut S, Frere J, Boutibonnes P, Auffray Y. Comparison of the bile salts and sodium  
777 dodecyl sulfate stress responses in *Enterococcus faecalis*. *Appl Environ Microbiol.*  
778 1996;62(7):2416-20. Epub 1996/07/01. doi: 10.1128/AEM.62.7.2416-2420.1996. PubMed  
779 PMID: 8779581; PubMed Central PMCID: PMCPMC168024.
- 780 58. Ridlon JM, Kang DJ, Hylemon PB. Bile salt biotransformations by human intestinal  
781 bacteria. *J Lipid Res.* 2006;47(2):241-59. Epub 2005/11/22. doi: 10.1194/jlr.R500013-JLR200.  
782 PubMed PMID: 16299351.
- 783 59. Dale JL, Cagnazzo J, Phan CQ, Barnes AM, Dunny GM. Multiple roles for *Enterococcus*  
784 *faecalis* glycosyltransferases in biofilm-associated antibiotic resistance, cell envelope integrity,  
785 and conjugative transfer. *Antimicrob Agents Chemother.* 2015;59(7):4094-105. Epub  
786 2015/04/29. doi: 10.1128/AAC.00344-15. PubMed PMID: 25918141; PubMed Central PMCID:  
787 PMCPMC4468649.
- 788 60. Kellogg SL, Kristich CJ. Functional dissection of the CroRS two-component system  
789 required for resistance to cell wall stressors in *Enterococcus faecalis*. *J Bacteriol.*  
790 2016;198(8):1326-36. Epub 2016/02/18. doi: 10.1128/JB.00995-15. PubMed PMID: 26883822;  
791 PubMed Central PMCID: PMCPMC4859583.



- 792 61. Kristich CJ, Wells CL, Dunny GM. A eukaryotic-type Ser/Thr kinase in *Enterococcus*  
793 *faecalis* mediates antimicrobial resistance and intestinal persistence. Proc Natl Acad Sci U S A.  
794 2007;104(9):3508-13. Epub 2007/03/16. doi: 10.1073/pnas.0608742104. PubMed PMID:  
795 17360674; PubMed Central PMCID: PMCPMC1805595.
- 796 62. Tran TT, Panesso D, Mishra NN, Mileykovskaya E, Guan Z, Munita JM, et al.  
797 Daptomycin-resistant *Enterococcus faecalis* diverts the antibiotic molecule from the division  
798 septum and remodels cell membrane phospholipids. mBio. 2013;4(4). Epub 2013/07/25. doi:  
799 10.1128/mBio.00281-13. PubMed PMID: 23882013; PubMed Central PMCID:  
800 PMCPMC3735187.
- 801 63. Reyes J, Panesso D, Tran TT, Mishra NN, Cruz MR, Munita JM, et al. A *liaR* deletion  
802 restores susceptibility to daptomycin and antimicrobial peptides in multidrug-resistant  
803 *Enterococcus faecalis*. J Infect Dis. 2015;211(8):1317-25. Epub 2014/11/02. doi:  
804 10.1093/infdis/jiu602. PubMed PMID: 25362197; PubMed Central PMCID: PMCPMC4402337.
- 805 64. Comenge Y, Quintiliani R, Jr., Li L, Dubost L, Brouard JP, Hugonnet JE, et al. The  
806 CroRS two-component regulatory system is required for intrinsic beta-lactam resistance in  
807 *Enterococcus faecalis*. J Bacteriol. 2003;185(24):7184-92. Epub 2003/12/03. doi:  
808 10.1128/jb.185.24.7184-7192.2003. PubMed PMID: 14645279; PubMed Central PMCID:  
809 PMCPMC296236.
- 810 65. Hancock L, Perego M. Two-component signal transduction in *Enterococcus faecalis*. J  
811 Bacteriol. 2002;184(21):5819-25. Epub 2002/10/11. doi: 10.1128/jb.184.21.5819-5825.2002.  
812 PubMed PMID: 12374813; PubMed Central PMCID: PMCPMC135378.
- 813 66. Hancock LE, Perego M. Systematic inactivation and phenotypic characterization of two-  
814 component signal transduction systems of *Enterococcus faecalis* V583. J Bacteriol.

815 2004;186(23):7951-8. Epub 2004/11/18. doi: 10.1128/JB.186.23.7951-7958.2004. PubMed  
816 PMID: 15547267; PubMed Central PMCID: PMCPMC529088.

817 67. Kristich CJ, Little JL, Hall CL, Hoff JS. Reciprocal regulation of cephalosporin resistance  
818 in *Enterococcus faecalis*. mBio. 2011;2(6):e00199-11. Epub 2011/11/03. doi:  
819 10.1128/mBio.00199-11. PubMed PMID: 22045988; PubMed Central PMCID:  
820 PMCPMC3202758.

821 68. Banla IL, Kommineni S, Hayward M, Rodrigues M, Palmer KL, Salzman NH, et al.  
822 Modulators of *Enterococcus faecalis* cell envelope integrity and antimicrobial resistance  
823 influence stable colonization of the mammalian gastrointestinal tract. Infect Immun. 2018;86(1).  
824 Epub 2017/10/19. doi: 10.1128/IAI.00381-17. PubMed PMID: 29038125; PubMed Central  
825 PMCID: PMCPMC5736811.

826 69. Kellogg SL, Kristich CJ. Convergence of PASTA kinase and two-component signaling in  
827 response to cell wall stress in *Enterococcus faecalis*. J Bacteriol. 2018;200(12). Epub  
828 2018/04/11. doi: 10.1128/JB.00086-18. PubMed PMID: 29632091; PubMed Central PMCID:  
829 PMCPMC5971478.

830 70. Dale JL, Beckman KB, Willett JLE, Nilson JL, Palani NP, Baller JA, et al. Comprehensive  
831 functional analysis of the *Enterococcus faecalis* core genome using an ordered, sequence-  
832 defined collection of insertional mutations in strain OG1RF. mSystems. 2018;3(5). Epub  
833 2018/09/19. doi: 10.1128/mSystems.00062-18. PubMed PMID: 30225373; PubMed Central  
834 PMCID: PMCPMC6134198.

835 71. Labbe BD, Kristich CJ. Growth- and stress-induced PASTA kinase phosphorylation in  
836 *Enterococcus faecalis*. J Bacteriol. 2017;199(21). Epub 2017/08/16. doi: 10.1128/JB.00363-17.  
837 PubMed PMID: 28808126; PubMed Central PMCID: PMCPMC5626955.

- 838 72. Madsen JS, Sorensen SJ, Burmolle M. Bacterial social interactions and the emergence  
839 of community-intrinsic properties. *Curr Opin Microbiol.* 2018;42:104-9. Epub 2017/12/05. doi:  
840 10.1016/j.mib.2017.11.018. PubMed PMID: 29197823.
- 841 73. Xavier JB, Foster KR. Cooperation and conflict in microbial biofilms. *Proc Natl Acad Sci*  
842 U S A. 2007;104(3):876-81. Epub 2007/01/11. doi: 10.1073/pnas.0607651104. PubMed PMID:  
843 17210916; PubMed Central PMCID: PMCPMC1783407.
- 844 74. Leskinen K, Blasdel BG, Lavigne R, Skurnik M. RNA-sequencing reveals the  
845 progression of phage-host interactions between phiR1-37 and *Yersinia enterocolitica*. *Viruses.*  
846 2016;8(4):111. Epub 2016/04/26. doi: 10.3390/v8040111. PubMed PMID: 27110815; PubMed  
847 Central PMCID: PMCPMC4848604.
- 848 75. Mojardin L, Salas M. Global transcriptional analysis of virus-host interactions between  
849 phage  $\Phi$ phi29 and *Bacillus subtilis*. *J Virol.* 2016;90(20):9293-304. Epub 2016/08/05. doi:  
850 10.1128/JVI.01245-16. PubMed PMID: 27489274; PubMed Central PMCID: PMCPMC5044823.
- 851 76. Sacher JC, Flint A, Butcher J, Blasdel B, Reynolds HM, Lavigne R, et al. Transcriptomic  
852 analysis of the *Campylobacter jejuni* response to T4-like phage NCTC 12673 infection. *Viruses.*  
853 2018;10(6). Epub 2018/06/20. doi: 10.3390/v10060332. PubMed PMID: 29914170; PubMed  
854 Central PMCID: PMCPMC6024767.
- 855 77. De Sordi L, Khanna V, Debarbieux L. The gut microbiota facilitates drifts in the genetic  
856 diversity and infectivity of bacterial viruses. *Cell Host Microbe.* 2017;22(6):801-8 e3. Epub  
857 2017/11/28. doi: 10.1016/j.chom.2017.10.010. PubMed PMID: 29174401.
- 858 78. Hsu BB, Gibson TE, Yeliseyev V, Liu Q, Lyon L, Bry L, et al. Dynamic modulation of the  
859 gut microbiota and metabolome by bacteriophages in a mouse model. *Cell Host Microbe.*

860 2019;25(6):803-14 e5. Epub 2019/06/09. doi: 10.1016/j.chom.2019.05.001. PubMed PMID:  
861 31175044; PubMed Central PMCID: PMC6579560.

862 79. Reyes A, Wu M, McNulty NP, Rohwer FL, Gordon JI. Gnotobiotic mouse model of  
863 phage-bacterial host dynamics in the human gut. Proc Natl Acad Sci U S A.  
864 2013;110(50):20236-41. Epub 2013/11/22. doi: 10.1073/pnas.1319470110. PubMed PMID:  
865 24259713; PubMed Central PMCID: PMC6579560.

866 80. Dissanayake U, Ukhanova M, Moyer ZD, Sulakvelidze A, Mai V. Bacteriophages reduce  
867 pathogenic *Escherichia coli* counts in mice without distorting gut microbiota. Front Microbiol.  
868 2019;10:1984. Epub 2019/09/26. doi: 10.3389/fmicb.2019.01984. PubMed PMID: 31551950;  
869 PubMed Central PMCID: PMC6748168.

870 81. Ruhe ZC, Wallace AB, Low DA, Hayes CS. Receptor polymorphism restricts contact-  
871 dependent growth inhibition to members of the same species. mBio. 2013;4(4). Epub  
872 2013/07/25. doi: 10.1128/mBio.00480-13. PubMed PMID: 23882017; PubMed Central PMCID:  
873 PMC3735181.

874 82. Cascales E, Buchanan SK, Duche D, Kleantous C, Llobes R, Postle K, et al. Colicin  
875 biology. Microbiol Mol Biol Rev. 2007;71(1):158-229. Epub 2007/03/10. doi:  
876 10.1128/MMBR.00036-06. PubMed PMID: 17347522; PubMed Central PMCID:  
877 PMC1847374.

878 83. Ruhe ZC, Low DA, Hayes CS. Polymorphic toxins and their immunity proteins: diversity,  
879 evolution, and mechanisms of delivery. Annu Rev Microbiol. 2020. Epub 2020/07/19. doi:  
880 10.1146/annurev-micro-020518-115638. PubMed PMID: 32680451.

881 84. Kohler T, Donner V, van Delden C. Lipopolysaccharide as shield and receptor for R-  
882 pyocin-mediated killing in *Pseudomonas aeruginosa*. J Bacteriol. 2010;192(7):1921-8. Epub

883 2010/02/02. doi: 10.1128/JB.01459-09. PubMed PMID: 20118263; PubMed Central PMCID:  
884 PMCPMC2838038.

885 85. Ruhe ZC, Nguyen JY, Xiong J, Koskiniemi S, Beck CM, Perkins BR, et al. CdiA effectors  
886 use modular receptor-binding domains to recognize target bacteria. *mBio*. 2017;8(2). Epub  
887 2017/03/30. doi: 10.1128/mBio.00290-17. PubMed PMID: 28351921; PubMed Central PMCID:  
888 PMCPMC5371414.

889 86. Willett JL, Gucinski GC, Fatherree JP, Low DA, Hayes CS. Contact-dependent growth  
890 inhibition toxins exploit multiple independent cell-entry pathways. *Proc Natl Acad Sci U S A*.  
891 2015;112(36):11341-6. Epub 2015/08/26. doi: 10.1073/pnas.1512124112. PubMed PMID:  
892 26305955; PubMed Central PMCID: PMCPMC4568652.

893 87. Coulthurst S. The type VI secretion system: a versatile bacterial weapon. *Microbiology*.  
894 2019;165(5):503-15. Epub 2019/03/21. doi: 10.1099/mic.0.000789. PubMed PMID: 30893029.

895 88. Krasauskas R, Skerniškytė J, Martinkus J, Armalytė J, Sužiedėlienė E. Capsule protects  
896 *Acinetobacter baumannii* from inter-bacterial competition mediated by CdiA toxin. *Frontiers in*  
897 *Microbiology*. 2020;11(1493). doi: 10.3389/fmicb.2020.01493.

898 89. Aoki SK, Malinverni JC, Jacoby K, Thomas B, Pamma R, Trinh BN, et al. Contact-  
899 dependent growth inhibition requires the essential outer membrane protein BamA (YaeT) as the  
900 receptor and the inner membrane transport protein AcrB. *Mol Microbiol*. 2008;70(2):323-40.  
901 Epub 2008/09/03. doi: 10.1111/j.1365-2958.2008.06404.x. PubMed PMID: 18761695; PubMed  
902 Central PMCID: PMCPMC2579741.

903 90. Virtanen P, Wäneskog M, Koskiniemi S. Class II contact-dependent growth inhibition  
904 (CDI) systems allow for broad-range cross-species toxin delivery within the Enterobacteriaceae

905 family. Mol Microbiol. 2019;111(4):1109-25. Epub 2019/03/18. doi: 10.1111/mmi.14214.  
906 PubMed PMID: 30710431; PubMed Central PMCID: PMC6850196.

907 91. Flores-Mireles AL, Walker JN, Caparon M, Hultgren SJ. Urinary tract infections:  
908 epidemiology, mechanisms of infection and treatment options. Nat Rev Microbiol.  
909 2015;13(5):269-84. Epub 2015/04/09. doi: 10.1038/nrmicro3432. PubMed PMID: 25853778;  
910 PubMed Central PMCID: PMC4457377.

911 92. Giacometti A, Cirioni O, Schimizzi AM, Del Prete MS, Barchiesi F, D'Errico MM, et al.  
912 Epidemiology and microbiology of surgical wound infections. J Clin Microbiol. 2000;38(2):918-  
913 22. Epub 2000/02/03. PubMed PMID: 10655417; PubMed Central PMCID: PMC686247.

914 93. Keogh D, Tay WH, Ho YY, Dale JL, Chen S, Umashankar S, et al. Enterococcal  
915 metabolite cues facilitate interspecies niche modulation and polymicrobial infection. Cell Host  
916 Microbe. 2016;20(4):493-503. Epub 2016/10/14. doi: 10.1016/j.chom.2016.09.004. PubMed  
917 PMID: 27736645; PubMed Central PMCID: PMC5076562.

918 94. Goh HMS, Yong MHA, Chong KKL, Kline KA. Model systems for the study of  
919 enterococcal colonization and infection. Virulence. 2017;8(8):1525-62. Epub 2017/01/20. doi:  
920 10.1080/21505594.2017.1279766. PubMed PMID: 28102784; PubMed Central PMCID:  
921 PMC5810481.

922 95. King KC, Brockhurst MA, Vasieva O, Paterson S, Betts A, Ford SA, et al. Rapid  
923 evolution of microbe-mediated protection against pathogens in a worm host. ISME J.  
924 2016;10(8):1915-24. Epub 2016/03/16. doi: 10.1038/ismej.2015.259. PubMed PMID: 26978164;  
925 PubMed Central PMCID: PMC5029159.

926 96. Hammer ND, Cassat JE, Noto MJ, Lojek LJ, Chadha AD, Schmitz JE, et al. Inter- and  
927 intraspecies metabolite exchange promotes virulence of antibiotic-resistant *Staphylococcus*

- 928 *aureus*. Cell Host Microbe. 2014;16(4):531-7. Epub 2014/10/10. doi:  
929 10.1016/j.chom.2014.09.002. PubMed PMID: 25299336; PubMed Central PMCID:  
930 PMCPMC4197139.
- 931 97. Sullivan MJ, Petty NK, Beatson SA. Easyfig: a genome comparison visualizer.  
932 Bioinformatics. 2011;27(7):1009-10. Epub 2011/01/28. doi: 10.1093/bioinformatics/btr039.  
933 PubMed PMID: 21278367; PubMed Central PMCID: PMCPMC3065679.
- 934 98. Kanehisa M, Goto S. KEGG: kyoto encyclopedia of genes and genomes. Nucleic Acids  
935 Res. 2000;28(1):27-30. doi: 10.1093/nar/28.1.27. PubMed PMID: 10592173; PubMed Central  
936 PMCID: PMCPMC102409.
- 937 99. Sigrist CJ, de Castro E, Cerutti L, Cuče BA, Hulo N, Bridge A, et al. New and  
938 continuing developments at PROSITE. Nucleic Acids Res. 2013;41(Database issue):D344-7.  
939 Epub 2012/11/17. doi: 10.1093/nar/gks1067. PubMed PMID: 23161676; PubMed Central  
940 PMCID: PMCPMC3531220.
- 941 100. DeLano WD. The PyMOL Molecular Graphics System, 1.3. Schroedinger, LLC2010.
- 942 101. Kumar S, Stecher G, Li M, Knyaz C, Tamura K. MEGA X: Molecular Evolutionary  
943 Genetics Analysis across computing platforms. Mol Biol Evol. 2018;35(6):1547-9. doi:  
944 10.1093/molbev/msy096. PubMed PMID: 29722887; PubMed Central PMCID:  
945 PMCPMC5967553.
- 946 102. Coordinators NR. Database resources of the National Center for Biotechnology  
947 Information. Nucleic Acids Res. 2018;46(D1):D8-D13. doi: 10.1093/nar/gkx1095. PubMed  
948 PMID: 29140470; PubMed Central PMCID: PMCPMC5753372.

949 103. Letunic I, Bork P. Interactive Tree Of Life (iTOL) v4: recent updates and new  
950 developments. *Nucleic Acids Res.* 2019;47(W1):W256-W9. doi: 10.1093/nar/gkz239. PubMed  
951 PMID: 30931475; PubMed Central PMCID: PMC6602468.

952 104. Geer LY, Domrachev M, Lipman DJ, Bryant SH. CDART: protein homology by domain  
953 architecture. *Genome Res.* 2002;12(10):1619-23. doi: 10.1101/gr.278202. PubMed PMID:  
954 12368255; PubMed Central PMCID: PMC6602468.

955 105. Barnes WM. PCR amplification of up to 35-kb DNA with high fidelity and high yield from  
956 lambda bacteriophage templates. *Proc Natl Acad Sci U S A.* 1994;91(6):2216-20. Epub  
957 1994/03/15. PubMed PMID: 8134376; PubMed Central PMCID: PMC6602468.

958 106. Gibson DG, Young L, Chuang RY, Venter JC, Hutchison CA, 3rd, Smith HO. Enzymatic  
959 assembly of DNA molecules up to several hundred kilobases. *Nat Methods.* 2009;6(5):343-5.  
960 Epub 2009/04/14. doi: 10.1038/nmeth.1318. PubMed PMID: 19363495.

961 107. Thurlow LR, Thomas VC, Hancock LE. Capsular polysaccharide production in  
962 *Enterococcus faecalis* and contribution of CpsF to capsule serospecificity. *J Bacteriol.*  
963 2009;191(20):6203-10. Epub 2009/08/18. doi: 10.1128/JB.00592-09. PubMed PMID: 19684130;  
964 PubMed Central PMCID: PMC6602468.

965 108. Krogh A, Larsson B, von Heijne G, Sonnhammer EL. Predicting transmembrane protein  
966 topology with a hidden Markov model: application to complete genomes. *J Mol Biol.*  
967 2001;305(3):567-80. doi: 10.1006/jmbi.2000.4315. PubMed PMID: 11152613.

968

## 969 **Acknowledgments**

970 This work was supported by National Institutes of Health grants R01AI141479 (B.A.D.) and  
971 R01AI122742 (G.M.D.). J.L.E.W. was supported by American Heart Association Grant



972 19POST34450124 / Julia Willett / 2018. We would like to thank Andrés Vázquez-Torres, Laurel  
973 Lenz, Alex Horswill, Stefan Pukatzki, Kelly Doran, and their lab members for sharing bacterial  
974 strains used in this study. We thank Michelle Korir for the *ireK* complementation plasmid  
975 construct and strain.

976

## 977 **Author Contributions**

978 A.C., J.L.E.W., G.M.D. and B.A.D. designed the study. A.C. and J.L.E.W. performed  
979 experiments and bioinformatic analyses. A.C., J.L.E.W., G.M.D. and B.A.D. analyzed data. A.C.,  
980 J.L.E.W. and B.A.D. wrote the paper with input from G.M.D.

981

## 982 **Corresponding author**

983 Address correspondence to Breck A. Duerkop [breck.duerkop@cuanschutz.edu](mailto:breck.duerkop@cuanschutz.edu)

984

## 985 **Competing Interests**

986 There are no competing interests to report for this work.

987

## 988 **Figure Legends**

989

990 **Figure 1. Phage mediated inhibition of bystander bacteria is dependent on enterococcal**  
991 **T7SS. (A)** Diagram showing the location of T7SS genes in *E. faecalis* OG1RF (NC\_017316.1)  
992 compared to *E. faecalis* V583 (NC\_004668.1). Sequences were obtained from NCBI, and  
993 homology comparisons were rendered in EasyFig. Nucleotide alignments generated by Clustal  
994 Omega are enlarged for clarity (dashed lines). Stop codons of genes EF1328/OG1RF\_11099  
995 and EF1337/OG1RF\_11127 are boxed. **(B)** Schematic representation of the co-culture assay  
996 used to assess the viability of bystander bacteria during phage induced T7SS activity of wild  
997 type *E. faecalis* OG1RF and  $\Delta$ *essB*. Relative viability of bystander strains is calculated by

998 measuring the ratio of bystander cfus in the phage infected culture compared to the bystander  
999 cfus from an uninfected control culture. **(C)** The relative abundance of viable bystander  
1000 bacterium *E. faecalis*  $\Delta pip_{V583}$ . Complementation of the *E. faecalis*  $\Delta essB$  mutant,  $\Delta essB$   
1001 (pLZ12A::*essB*), restores T7SS dependent bystander inhibition.  $\Delta essB$  (pLZ12A) is the empty  
1002 vector control. **(D)** T7SS inhibition of other bacterial species in the presence and absence of  
1003 phage infected *E. faecalis* OG1RF or  $\Delta essB$ . Data represent three biological replicates. Error  
1004 bars indicate standard deviation. \* $P < 0.00001$  by unpaired Student's t-test.

1005

1006 **Figure 2. Identification of *E. faecalis* T7SS toxin and immunity proteins that dictate**  
1007 **bystander growth inhibition. (A)** Putative toxin-encoding genes in the OG1RF T7SS locus.  
1008 LXG domains in OG1RF\_11109 and OG1RF\_11121 were identified using KEGG and ExPASy  
1009 PROSITE. Putative orphan toxins were identified by homology to OG1RF\_11109 or  
1010 OG1RF\_11121. Gray lines between diagrams indicate the regions and degree of nucleotide  
1011 conservation between genes. Homology diagrams were rendered in EasyFig. Gene colors for  
1012 OG1RF\_11109, OG1RF\_11111, and OG1RF\_11121 match the color scheme in panel **(B)**.  
1013 OG1RF\_11113 and OG1RF\_11123 are shaded black to indicate that their corresponding  
1014 immunity genes were not tested in panel **(B)**. **(B)** *E. faecalis* OG1RF T7SS mediated growth  
1015 inhibition of phage resistant *E. faecalis*  $\Delta pip_{V583}$  during infection is alleviated by expressing  
1016 OG1RF\_11122 in *E. faecalis*  $\Delta pip_{V583}$  but not in the presence of pLZ12A empty vector, or  
1017 expressing OG1RF\_11110, OG1RF\_11112, or OG1RF\_12413. **(C – D)** Disruption of  
1018 OG1RF\_11121 by a transposon insertion rescues growth of phage resistant *E. faecalis*  $\Delta pip_{V583}$   
1019 **(C)** and *S. aureus* **(D)** strains during co-culture. Complementation of OG1RF\_11121-Tn restores  
1020 bystander intoxication. Data represent three biological replicates. Error bars indicate standard  
1021 deviation. \* $P < 0.0001$  by unpaired Student's t-test.

1022

1023 **Figure 3. Sub-lethal antibiotic treatment enhances T7SS gene expression leading to**  
1024 **inhibition of bystander bacteria.** Altered expression of T7SS genes upon exposure to sub-  
1025 inhibitory concentrations of **(A)** ampicillin (0.19 µg/ml), vancomycin (0.78 µg/ml) or daptomycin  
1026 (6.25 µg/ml) and **(B)** ciprofloxacin (2 µg/ml) or mitomycin C (4 µg/ml) for 40 minutes relative to  
1027 the untreated control. *clpX* is shown as a negative control. **(C-E)** Contact-dependent T7SS  
1028 mediated inhibition of bystander bacteria in the presence of daptomycin. Relative viability of *E.*  
1029 *faecalis*  $\Delta pip_{V583}$  was measured during co-culture with *E. faecalis* OG1RF or  $\Delta essB$  antagonists  
1030 in the presence and absence of daptomycin treatment in **(C)** liquid culture (2.5 µg/ml  
1031 daptomycin), **(D)** trans-well plates to prevent physical engagement between cells (2.5 µg/ml  
1032 daptomycin) and **(E)** in contact on agar media (0.5 µg/ml daptomycin).  $\Delta essB$  (pLZ12A) and  
1033  $\Delta essB$  (pLZ12A::*essB*) represent the empty vector control and complemented strains. Data  
1034 show three biological replicates. Error bars indicate standard deviation. \* $P < 0.01$ , \*\* $P < 0.001$  to  
1035 0.0001 by unpaired Student's t-test.

1036  
1037 **Figure 4. IreK and OG1RF\_11099 control transcription of enterococcal T7SS genes and**  
1038 **subsequent inhibition of bystander bacteria during phage infection.** **(A)** Phage infection  
1039 leads to enhanced expression of T7SS genes in wild type *E. faecalis* OG1RF but not in a  $\Delta ireK$   
1040 mutant strain. **(B)** Growth inhibition of *E. faecalis*  $\Delta pip_{V583}$  during phage infection of *E. faecalis*  
1041 OG1RF is abrogated in the  $\Delta essB$  and  $\Delta ireK$  mutants carrying empty pCIEtm. pCIEtm::*ireK*  
1042 complemented the T7SS activity defect of the  $\Delta ireK$  strain. **(C)** Disruption of OG1RF\_11099  
1043 leads to reduced expression of T7SS genes during phage infection. The data are represented  
1044 as the fold change of normalized mRNA relative to uninfected samples at the same time  
1045 points. **(D)** T7SS dependent intraspecies antagonism during phage infection is alleviated in the  
1046 presence of OG1RF\_11099-Tn mutant carrying empty pCIEtm. pCIEtm::11099 complemented  
1047 the T7SS activity defect of the OG1RF\_11099-Tn mutant strain. Data represent three biological  
1048 replicates. Error bars indicate standard deviation. \* $P < 0.00001$  by unpaired Student's t-test.

1049

1050 **Figure 5. A model for inhibition of bystander bacteria by the *E. faecalis* OG1RF T7SS.**

1051 Phage and select antibiotics trigger a response involving IreK that results in induction of  
1052 expression of T7SS genes. Transcription of T7SS genes is regulated by the predicted GntR-  
1053 family transcription factor OG1RF\_11099. The predicted core components of the OG1RF T7SS  
1054 machinery are putative membrane proteins EsaA (OG1RF\_11101), OG1RF\_11102, EssB  
1055 (OG1RF\_11104), and EssC1 (OG1RF\_11105) as well as the putative cytoplasmic protein EsaB  
1056 (OG1RF\_11103). EssC2 (OG1RF\_11115) lacks transmembrane domains and is thus not  
1057 predicted to be membrane-anchored. Upon induction of the T7SS, OG1RF\_11121 is secreted  
1058 from the cell, resulting in antibacterial activity against select neighboring bacteria. Expression of  
1059 OG1RF\_11122 can partially block toxicity caused by OG1RF\_11121. Predictions of membrane  
1060 topology were obtained using TMHMM [108]. The figure was created with Biorender.com.

1061

1062 **Figure S1. Phylogenetic tree of EsxA sequences in *enterococci*.** Non-redundant sequences

1063 (n=96) were identified using NCBI BLAST with OG1RF EsxA (OG1RF\_11100) as the input. The  
1064 tree was constructed in MEGAX using the Maximum Likelihood method and JTT matrix-based  
1065 model and is drawn to scale, with branch lengths measured in the number of substitutions per  
1066 site. The tree with the highest log likelihood (-3544.39) is shown. *E. faecalis* sequences are  
1067 highlighted in purple, and the GenBank identifier for EsxA from OG1RF (AEA93787.1) is shown  
1068 in red font.

1069

1070 **Figure S2. Phage VPE25 infects wild type *E. faecalis* OG1RF and T7SS mutants with**

1071 **similar efficacy. (A)** The measurement of phage particles released from wild type *E. faecalis*  
1072 OG1RF,  $\Delta$ essB, OG1RF\_11121-Tn, and OG1RF\_11099-Tn mutant strains following phage  
1073 VPE25 infection. **(B)** Viability of strains of the OG1RF background exhibiting differential T7SS  
1074 activity in the absence and presence of phage. **(C)** Viability of T7SS susceptible strains during

1075 intraspecies competition experiments in the absence and presence of phage. Data represent  
1076 three biological replicates. Error bars indicate standard deviation. \* $P < 0.0001$  by unpaired  
1077 Student's t-test.

1078

1079 **Figure S3. Phage induced T7SS inhibitory activity is contact dependent.** Intraspecies  
1080 competition experiment performed in the presence of unfiltered supernatant from phage treated  
1081 and untreated *E. faecalis* wild type OG1RF or  $\Delta essB$  added **(A)** to the top of a well separated by  
1082 a 0.4  $\mu\text{m}$  membrane from the bottom well containing *E. faecalis*  $\Delta pip_{V583}$  culture, and bacterial  
1083 viability was determined after 24 hours, or **(B)** directly into *E. faecalis*  $\Delta pip_{V583}$  culture in  
1084 microtiter plate wells ( $P = 0.7955$  by two-way analysis of variance [ANOVA]). **(C)** Growth of  
1085  $\Delta pip_{V583}$  was monitored in the presence of filtered supernatant from uninfected and phage  
1086 infected cultures of wild type *E. faecalis* OG1RF and  $\Delta essB$  ( $P = 0.0883$  by two-way analysis of  
1087 variance [ANOVA]). *E. faecalis*  $\Delta pip_{V583}$  cultures in all of these three contact-dependent assays  
1088 contained gentamicin (25  $\mu\text{g/ml}$ ) to prevent growth of the OG1RF background strains that may  
1089 have carried over in unfiltered supernatants. Error bars indicate standard deviation.

1090

1091 **Figure S4. Putative orphan toxins in OG1RF are found as full-length LXG-domain**  
1092 **proteins in other bacteria.** OG1RF\_11111, OG1RF\_11113, and OG1RF\_11123 sequences  
1093 were used as input for NCBI BLAST. Alignments and homology were rendered in EasyFig.

1094

1095 **Figure S5. A distal *E. faecalis* OG1RF locus encodes an additional LXG-domain protein.**  
1096 **(A)** Schematic showing homology between V583 (NC\_004668.1, top) and OG1RF  
1097 (NC\_017316.1, bottom). Sequences were obtained from NCBI, and homology comparisons  
1098 were rendered in EasyFig. **(B)** Cartoon depicting the LXG domain of OG1RF\_12414 (identified  
1099 using KEGG and ExPASy PROSITE). **(C)** Predicted structural homology between  
1100 OG1RF\_12414 (lilac) and the *Pseudomonas protogens* Pf-5 Tne2/Tni2 complex (PDB 6B12).

1101 Tne2 is shown in green, and Tni2 is shown in gray. Structural modeling was done using  
1102 PHYRE2, and images were rendered in Pymol.

1103

1104 **Figure S6. Domain architecture of enterococcal LXG proteins.** Domain architectures were  
1105 identified using the NCBI Conserved Domain Architectural Retrieval Tool (DART) with  
1106 OG1RF\_11109 as an input. Diagrams are drawn to scale.

1107

1108 **Figure S7. Antibiotic susceptibility of *E. faecalis* OG1RF.** Growth of wild type *E. faecalis*  
1109 OG1RF was monitored over 20 hours in the presence or absence of **(A)** ampicillin, **(B)**  
1110 vancomycin and **(C)** daptomycin in microtiter plates. The antibiotic concentrations highlighted  
1111 with a blue box were deemed sub-inhibitory and used to investigate T7SS gene expression  
1112 levels. Early log-phase cultures of *E. faecalis* OG1RF were grown in the presence or absence of  
1113 **(D)** mitomycin C (4 µg/ml) or **(E)** ciprofloxacin (2 µg/ml) to show that these concentrations of  
1114 DNA targeting antibiotics do not prevent bacterial growth. Error bars indicate standard deviation.

1115

1116 **Figure S8. Impact of daptomycin concentration on *E. faecalis* growth and T7SS induction.**  
1117 Growth of different enterococcal strains either untreated or treated with 6.25 µg/ml, 2.5 µg/ml or  
1118 0.5 µg/ml of daptomycin in **(A – C)** liquid media. **(D)** T7SS transcripts were measured from *E.*  
1119 *faecalis* OG1RF cells grown in liquid media containing either no daptomycin or 6.25 µg/ml, 2.5  
1120 µg/ml, or 0.5 µg/ml of daptomycin. The data are expressed as the average of three biological  
1121 replicates ± the standard deviation.  $P < 0.001$  by unpaired Student's t-test. **(E)** Viable bacterial  
1122 cells recovered from growth on daptomycin supplemented agar media for 24 hours. The dashed  
1123 line indicates the limit of detection.

1124

1125 **Figure S9. Effect of sub-lethal bile salt treatment on growth and T7SS transcription in *E.***  
1126 ***faecalis* OG1RF.** **(A)** Optical density of wild type *E. faecalis* OG1RF grown in the absence and

1127 presence of 4% sodium cholate was measured for 18 hours. **(B)** Transcript levels of OG1RF  
1128 T7SS genes in untreated and 4% sodium cholate treated *E. faecalis* OG1RF after 4 hours.  $P <$   
1129 0.001 to by unpaired Student's t-test. Error bars indicate standard deviation.

1130

1131 **Figure S10. *E. faecalis* mutants of cell wall homeostasis show no growth defects and**  
1132 **respond to phage VPE25 infection. (A)** Optical density of wild type *E. faecalis* OG1RF and  
1133 isogenic mutants were monitored for 18 hours. **(B)** While all strains were susceptible to phage  
1134 VPE25 infection, the proportion of released phage particles was diminished in the *croR* and  
1135 *croS* transposon mutant background. Data represent three biological replicates. Error bars  
1136 indicate standard deviation.  $*P < 0.001$  by unpaired Student's t-test.

1137

1138 **Figure S11. Quantitative PCR demonstrates that LiaR/S and CroS/R two-component**  
1139 **systems do not influence T7SS gene expression during phage infection. (A- F)** mRNA  
1140 transcript levels of T7SS genes are enhanced in the transposon mutants of *liaR*, *liaS*, *croR* and  
1141 *croS* strains similar to wild type *E. faecalis* OG1RF during phage infection (MOI = 1) compared  
1142 to untreated controls. Data represent three biological replicates. Error bars indicate standard  
1143 deviation.  $*P < 0.01$ ,  $**P < 0.0001$  by unpaired Student's t-test.

1144

1145 **Figure S12. Influence of sub-lethal ceftriaxone challenge and phage infection on the**  
1146 **expression of *E. faecalis* T7SS genes. (A)** Transcription of T7SS genes in *E. faecalis* OG1RF  
1147 are not elevated 20 minutes post ceftriaxone (128 $\mu$ g/ml) administration relative to an untreated  
1148 control. **(B)** OG1RF\_11099 expression remains unaltered during phage predation of wild type *E.*  
1149 *faecalis* OG1RF and  $\Delta ireK$  strains relative to uninfected controls. Data represent three biological  
1150 replicates. Error bars indicate standard deviation.

1151

1152 **Table S1. List of bacterial strains, phages, plasmids and primers used in this study.**

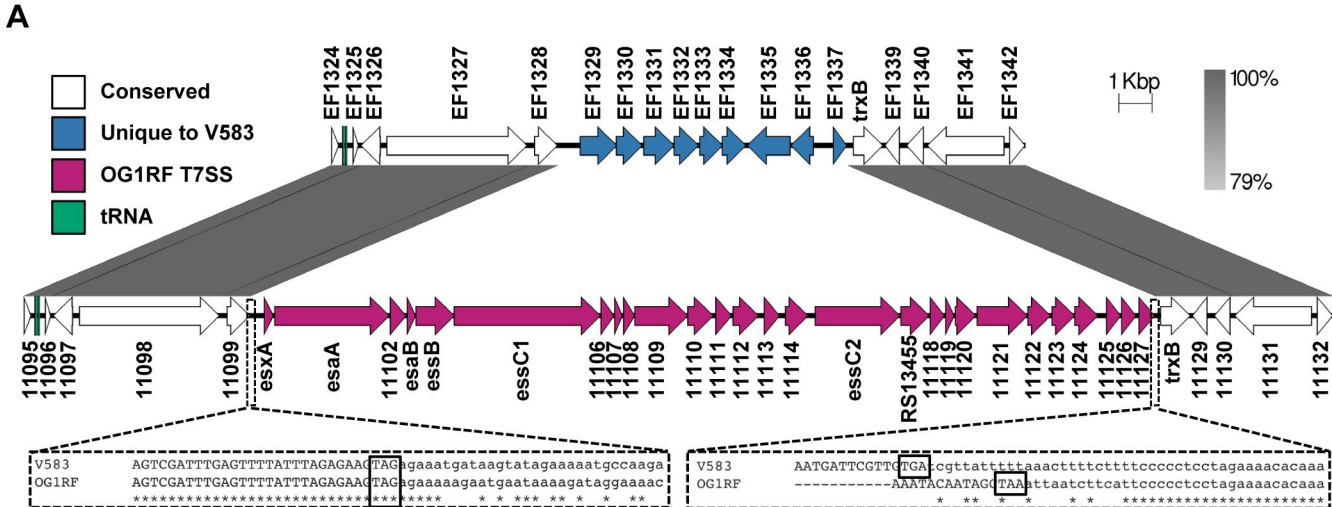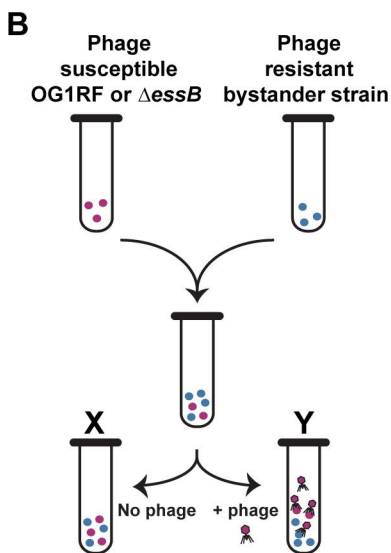

Relative viability =  
CFU/ml of **phage resistant bystander** in Y  
CFU/ml of **phage resistant bystander** in X

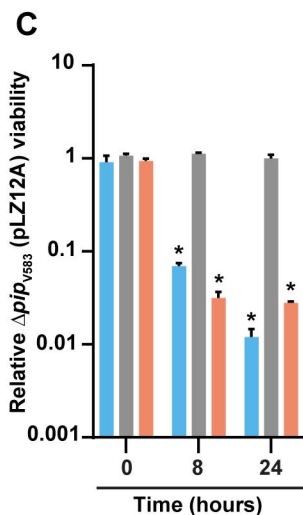

OG1RF (pLZ12A)  
 $\Delta$ essB (pLZ12A)  
 $\Delta$ essB (pLZ12A::essB)

Co-cultured with  
 $\Delta$ pip<sub>v583</sub> (pLZ12A)

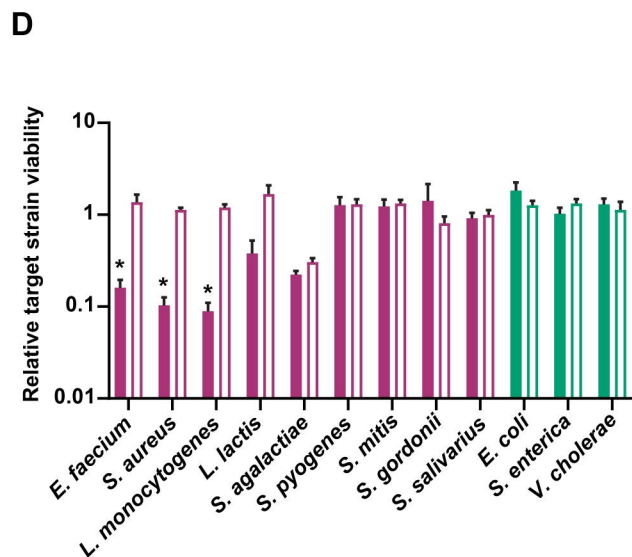

OG1RF or  $\Delta$ essB

Co-cultured with Gram - positive or - negative bacteria



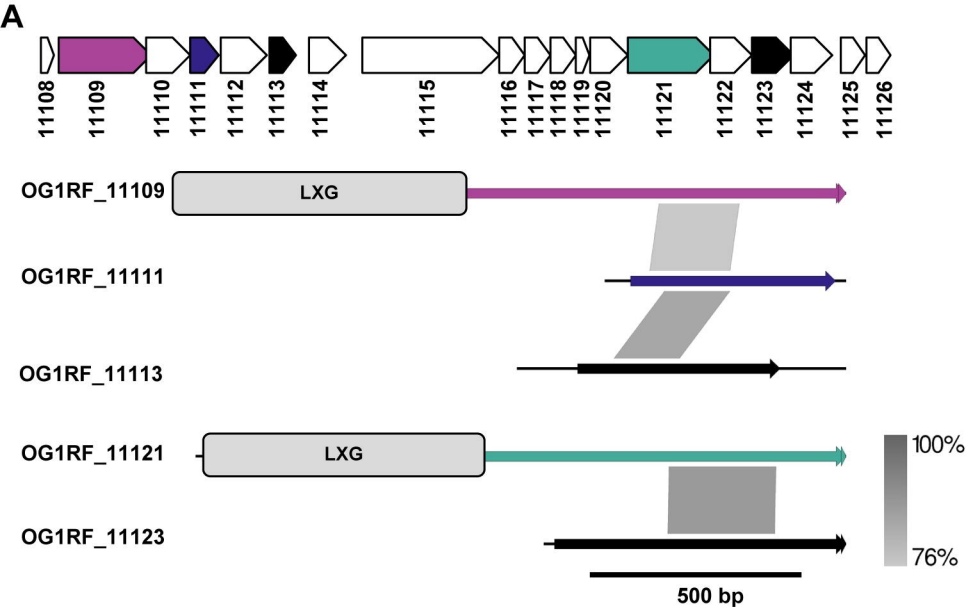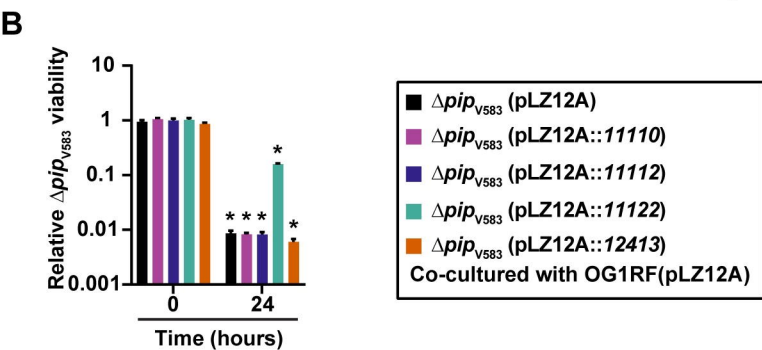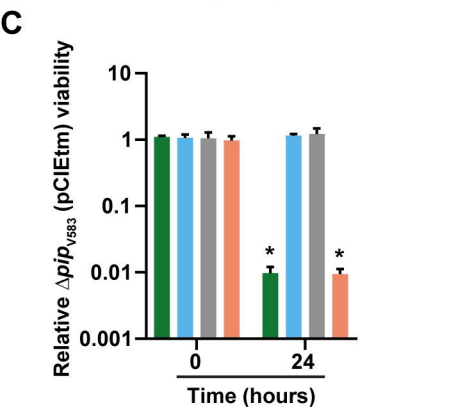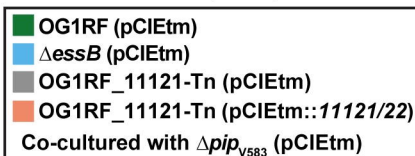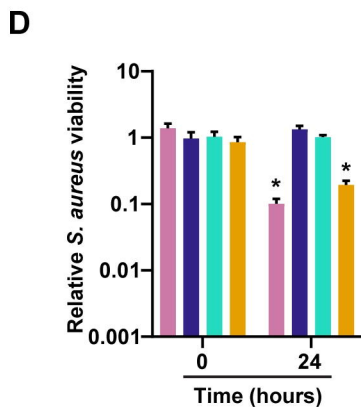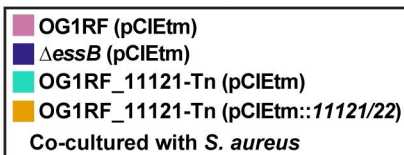

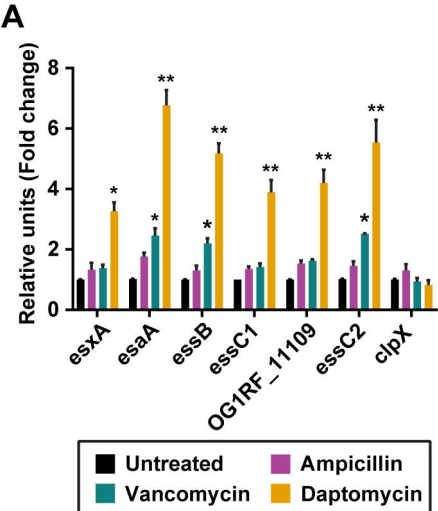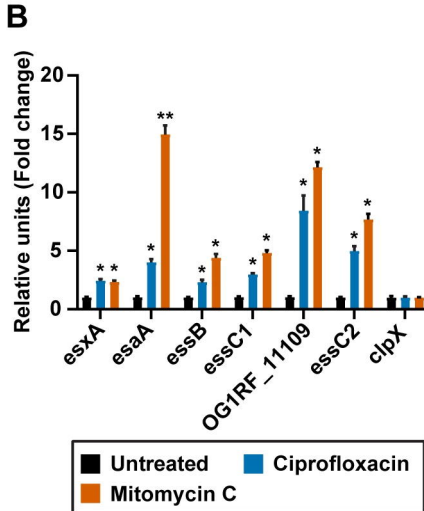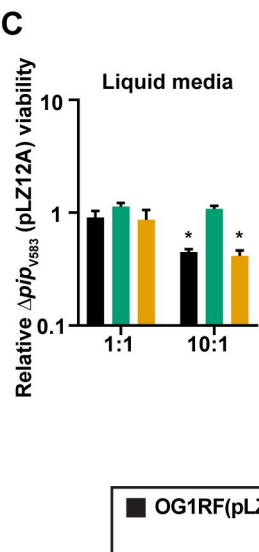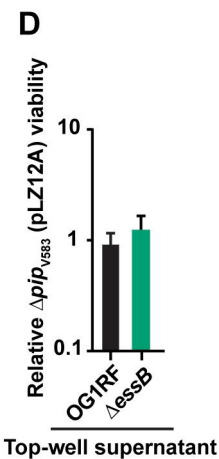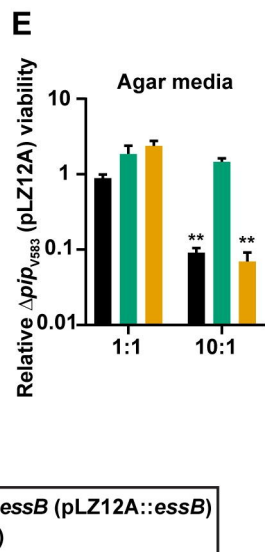

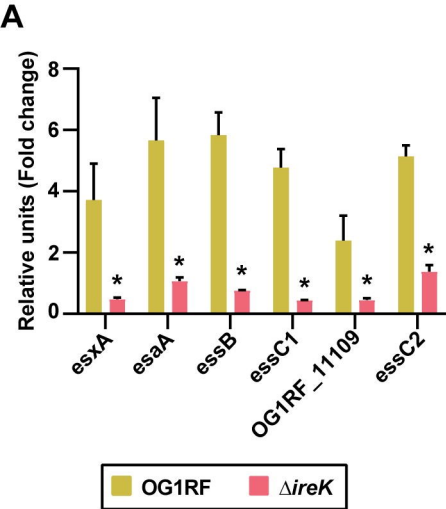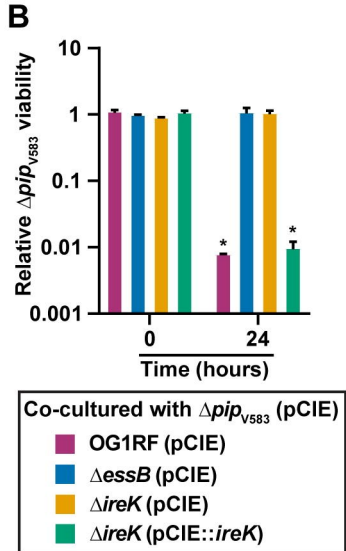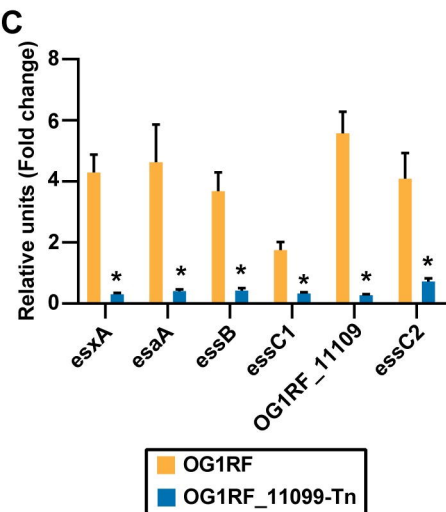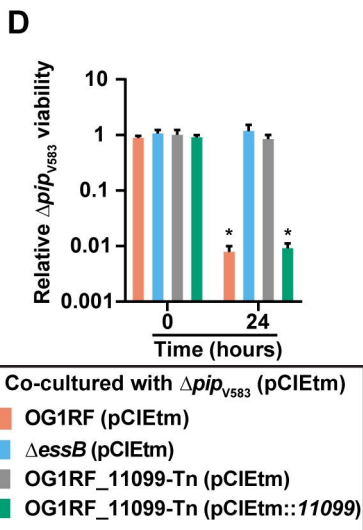

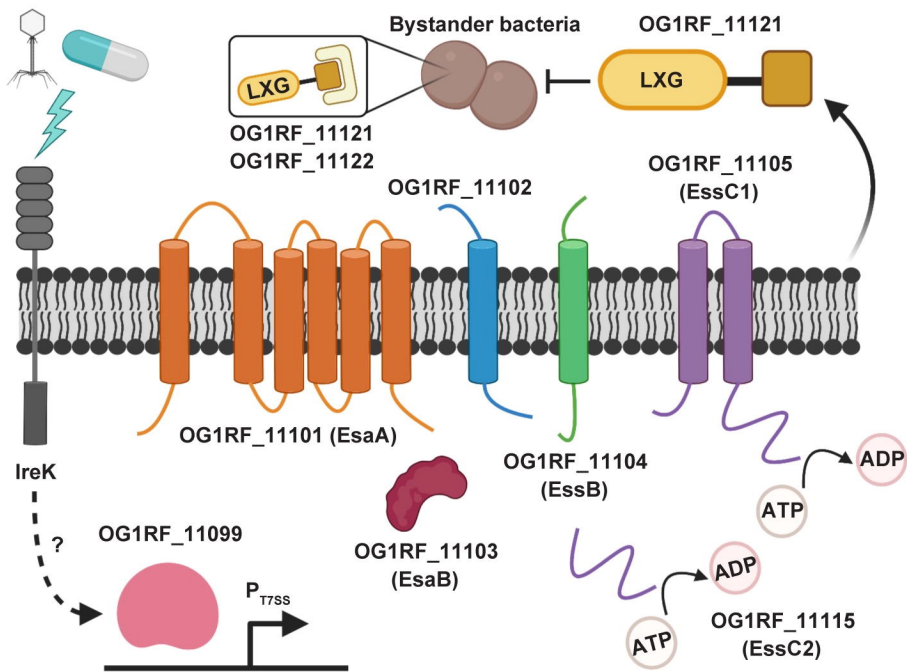

Source: https://www.biorxiv.org/content/10.1101/2020.05.11.077669v3.full.pdf
